# Supplementary material for: Bells, bomas and beefsteak: complex patterns of human-predator conflict at the wildlife-agropastoral interface in Zimbabwe
Source: PeerJ. 2017 Jan 24;5:e2898. doi: 10.7717/peerj.2898 (PMC5267574; doi:10.7717/peerj.2898)
Supplement: Data S1 [file peerj-05-2898-s002.xlsx]

## Sheet: ALL_CONFLICT_FINAL
	OID	DateRecorded	Dateincident	Year	locatioMabale	village	Longhomestead	Lathomestead	Longitude	Latitude	Animalslost	Specieslost	Animalsinjured	Speciesinjured	predator	Boma	Timeday	bell
1	1	2010-10-22	2009-01-01	2009	Tsholotsho	matetshaneni	507231	7855086	507208	7855507	1	goat	0	NA	Lion	N	N	NA
2	2	2009-01-28	2009-01-07	2009	Mabale	Lupote	499683	7952942	499683	7952942	1	goat	0	NA	Lion	Y	D	NA
3	3	2009-02-25	2009-01-18	2009	Tsholotsho	Mlevu	546198	7869756	546500	7872059	1	cattle	0	NA	Lion	N	NA	NA
4	4	2009-02-24	2009-01-24	2009	Mabale	Gezi	501024	7953277	501001	7953261	2	goat	0	NA	Lion	Y	N	NA
5	5	2009-02-24	2009-01-24	2009	Mabale	Gezi	500171	7954250	500249	7954214	1	cattle	0	NA	Lion	Y	N	NA
6	6	2009-02-27	2009-01-27	2009	Tsholotsho	Ziga	548736	7876732	546997	7875551	2	cattle	0	NA	Lion	N	NA	NA
7	7	2009-02-25	2009-01-31	2009	Tsholotsho	Mlevu	546285	7868255	545172	7871464	1	cattle	0	NA	Lion	N	N	NA
8	8	2009-02-27	2009-02-01	2009	Tsholotsho	Gwenga	543442	7870301	543752	7871328	2	donkey	0	NA	Lion	N	N	NA
9	9	2009-03-05	2009-02-03	2009	Tsholotsho	Mahlelengwa	539862	7869538	540197	7869800	1	goat	0	NA	Lion	N	N	NA
10	10	2009-02-27	2009-02-12	2009	Tsholotsho	Pelendaba	0	0	490500	7840700	1	cattle	0	NA	Lion	NA	N	NA
11	11	2010-10-29	2009-02-15	2009	Tsholotsho	gibixhegu	497201	7853959	497238	7854007	1	cattle	1	cattle	Lion	Y	N	NA
12	12	2010-10-30	2009-02-15	2009	Tsholotsho	bemba	529250	7848896	534500	7850000	2	cattle	0	NA	Leopard	N	D	N
13	13	2009-02-25	2009-02-17	2009	Tsholotsho	Mlevu	547938	7870160	547073	7870661	4	donkey	0	NA	Lion	N	N	NA
14	14	2009-02-27	2009-02-20	2009	Tsholotsho	Ndodana	524597	7863925	524180	7862029	1	cattle	3	cattle	Lion	N	N	NA
15	15	2009-02-24	2009-02-22	2009	Mabale	Magoli	487743	7945853	487760	7945836	1	cattle	1	cattle	Lion	N	N	NA
16	16	2009-02-25	2009-02-22	2009	Tsholotsho	Mhlabeni	538021	7872557	538336	7873053	2	donkey	1	donkey	Lion	N	N	NA
17	17	2009-02-25	2009-02-23	2009	Tsholotsho	Dibutibu	0	0	569496	7882235	5	cattle	0	NA	Lion	N	N	NA
18	18	2009-02-27	2009-02-24	2009	Tsholotsho	makeni	522859	7857799	519100	7860900	1	cattle	1	cattle	Lion	N	N	NA
19	19	2009-03-20	2009-02-26	2009	Tsholotsho	Zandile	0	0	0	0	1	cattle	0	NA	Hyaena	N	N	NA
20	20	2009-03-05	2009-02-28	2009	Tsholotsho	Ndodana	524900	7864600	525400	7865000	1	donkey	0	NA	Lion	N	N	NA
21	21	2009-03-12	2009-03-01	2009	Mabale	Mabale	507533	7946623	507505	7946627	1	donkey	0	NA	Lion	Y	N	NA
22	22	2009-03-12	2009-03-01	2009	Mabale	Mabale	507533	7946623	507505	7946627	1	donkey	0	NA	Lion	Y	N	NA
23	23	2010-10-07	2009-03-01	2009	Tsholotsho	umtshayeli	535415	7864495	535383	7864414	1	donkey	0	NA	Hyaena	N	N	NA
24	24	2009-03-12	2009-03-05	2009	Mabale	Mabale	507272	7946430	507280	7946390	1	cattle	0	NA	Lion	Y	N	NA
25	25	2009-03-12	2009-03-06	2009	Mabale	Dopota	500448	7948485	500257	7948531	8	goat	0	NA	Lion	N	N	NA
26	26	2009-03-12	2009-03-07	2009	Mabale	Dopota	500908	7948557	500325	7947852	1	cattle	1	cattle	Lion	N	N	NA
27	27	2009-03-12	2009-03-07	2009	Mabale	Dopota	500908	7948557	499502	7948401	1	cattle	1	cattle	Lion	N	N	NA
28	28	2009-04-02	2009-03-26	2009	Mabale	Lupote	496792	7952187	496494	7952152	0	NA	1	donkey	Lion	N	N	NA
29	29	2009-04-25	2009-04-07	2009	Tsholotsho	Mlevu	546361	7869790	542500	7873500	1	cattle	1	cattle	Lion	N	N	NA
30	30	2009-04-25	2009-04-09	2009	Tsholotsho	Ziga	550130	7875844	547606	7875929	4	cattle	0	NA	Lion	N	NA	NA
31	31	2009-04-25	2009-04-09	2009	Tsholotsho	Ndlovu	548736	7876732	547606	7875929	1	cattle	0	NA	Lion	N	N	NA
32	32	2010-10-21	2009-04-09	2009	Tsholotsho	gagwini	505619	7857872	506579	7859854	1	cattle	0	NA	Lion	N	D	NA
33	33	2009-05-10	2009-04-14	2009	Mabale	Lupote	497014	7951621	497016	7951592	1	cattle	1	cattle	Lion	N	D	NA
34	34	2010-10-06	2009-04-15	2009	Tsholotsho	umtshayeli	535970	7864912	538126	7863254	1	donkey	0	NA	Hyaena	Y	N	NA
35	35	2010-11-11	2009-04-15	2009	Tsholotsho	gwabazabuya	499869	7852129	497100	7853900	1	cattle	0	NA	Lion	N	N	N
36	36	2010-10-21	2009-04-19	2009	Tsholotsho	gagwini	505619	7857872	506900	7856020	1	cattle	0	NA	Lion	N	N	NA
37	37	2009-04-27	2009-04-21	2009	Mabale	Mabale	508346	7945603	508346	7945603	4	goat	0	NA	Lion	N	N	NA
38	38	2009-04-02	2009-04-25	2009	Mabale	Lupote	496509	7952143	496494	7952152	5	goat	0	NA	Lion	N	N	NA
39	39	2009-04-27	2009-04-26	2009	Mabale	Mabale	503427	7947495	503492	7947427	2	cattle	0	NA	Leopard	Y	N	NA
40	40	2010-11-11	2009-04-30	2009	Tsholotsho	gwabazabuya	499712	7852153	496201	7854900	1	cattle	0	NA	Lion	N	D	N
41	41	2010-11-16	2009-05-01	2009	Tsholotsho	Mangutana	536460	7855967	536086	7856567	1	donkey	0	NA	Hyaena	N	N	N
42	42	2010-11-16	2009-05-01	2009	Tsholotsho	Mangutana	536460	7855967	536086	7856567	1	cattle	0	NA	Leopard	N	N	N
43	43	2009-05-11	2009-05-02	2009	Mabale	Lupote	497589	7952120	497583	7952122	1	cattle	0	NA	Lion	N	N	NA
44	44	2010-12-16	2009-05-02	2009	Mabale	Chimwaravillage2	534784	7929147	534480	7928718	1	cattle	0	NA	Lion	N	D	NA
45	45	2009-05-06	2009-05-05	2009	Mabale	Lupote	498284	7951775	498297	7951772	1	cattle	0	NA	Lion	Y	N	NA
46	46	2010-10-21	2009-05-15	2009	Tsholotsho	Elangeni	499819	7857560	503400	7861646	3	cattle	2	cattle	Lion	N	N	NA
47	47	2010-10-21	2009-05-15	2009	Tsholotsho	emanaleni	499819	7857560	503400	7861646	3	cattle	2	cattle	Lion	N	N	NA
48	48	2009-05-26	2009-05-17	2009	Mabale	Sianyanga	504405	7954603	504399	7954548	1	cattle	0	NA	Lion	Y	N	NA
49	49	2009-05-26	2009-05-17	2009	Mabale	Sianyanga	504405	7954603	504399	7954548	1	cattle	0	NA	Lion	Y	N	NA
50	50	2009-05-27	2009-05-19	2009	Mabale	Mabale	513176	7948133	513221	7948137	1	cattle	0	NA	Lion	Y	D	NA
51	51	2009-06-07	2009-05-21	2009	Tsholotsho	Vulashaba	534276	7869540	534226	7872357	0	NA	1	cattle	Lion	N	N	NA
52	52	2009-05-26	2009-05-24	2009	Mabale	Lupote	498192	7954713	498255	7954664	1	cattle	0	NA	Lion	Y	N	NA
53	53	2009-05-26	2009-05-25	2009	Mabale	Lupote	496742	7952659	796742	7952684	0	NA	2	cattle	Hyaena	Y	N	NA
54	54	2009-05-24	2009-05-26	2009	Tsholotsho	Nganyana	548930	7882328	548511	7884765	1	cattle	0	NA	Hyaena	N	N	NA
55	55	2009-06-03	2009-06-02	2009	Mabale	Lupote	497732	7954962	497729	7954980	4	goat	1	goat	Lion	Y	N	NA
56	56	2009-06-03	2009-06-03	2009	Mabale	Nabushome	506029	7950478	506534	7950478	1	cattle	0	NA	Lion	N	D	NA
57	57	2009-06-07	2009-06-04	2009	Tsholotsho	Ngamo	0	0	0	0	1	goat	0	NA	Hyaena	Y	N	NA
58	58	2009-06-12	2009-06-12	2009	Mabale	Masikili	507591	7945299	507591	7945299	1	goat	0	NA	Cheetah	N	D	NA
59	59	2009-06-14	2009-06-13	2009	Mabale	Sianyanga	504545	7954644	504792	7954469	1	cattle	0	NA	Lion	N	N	NA
60	60	2009-07-15	2009-06-15	2009	Mabale	Masikili	512376	7947668	512376	7947668	4	dog	0	NA	Lion	N	D	NA
61	61	2010-10-20	2009-06-15	2009	Tsholotsho	sodaka	509344	7855202	509676	7856017	1	donkey	0	NA	Lion	N	D	NA
62	62	2009-06-30	2009-06-16	2009	Mabale	sialwindi	487598	7949146	487913	7949259	1	donkey	0	NA	Lion	Y	N	NA
63	63	2009-06-30	2009-06-17	2009	Mabale	sialwindi	487598	7949146	487495	7949117	10	pig	0	NA	Lion	Y	N	NA
64	64	2009-06-30	2009-06-22	2009	Mabale	Lupote	494722	7953111	494669	7953092	1	cattle	0	NA	Lion	Y	N	NA
65	65	2010-12-16	2009-06-25	2009	Mabale	Chimwaravillage2	534784	7929147	534817	7929101	2	donkey	0	NA	Lion	N	N	NA
66	66	2009-07-01	2009-06-29	2009	Mabale	Sianyanga	499136	7956132	499130	7956166	2	goat	0	NA	Lion	N	N	NA
67	67	2009-07-01	2009-06-30	2009	Mabale	Sianyanga	0	0	0	0	0	NA	2	cattle	Lion	N	N	NA
68	68	2010-11-18	2009-06-30	2009	Tsholotsho	Mashula	540465	7860867	541576	7861978	1	donkey	0	NA	Hyaena	N	N	N
69	69	2009-07-15	2009-07-01	2009	Mabale	Mabale	0	7945437	508074	7945437	0	NA	1	dog	Lion	N	N	NA
70	70	2010-10-21	2009-07-01	2009	Tsholotsho	gagwini	505868	7857856	505868	7857856	1	goat	0	NA	Leopard	Y	N	NA
71	71	2009-07-09	2009-07-06	2009	Tsholotsho	Stambara	0	0	0	0	1	cattle	0	NA	Hyaena	N	N	NA
72	72	2009-07-23	2009-07-09	2009	Tsholotsho	Vulashaba	533934	7869761	533930	7869782	1	donkey	0	NA	Lion	Y	N	NA
73	73	2009-07-15	2009-07-11	2009	Mabale	Mabale	505067	7945307	504762	7945969	2	goat	0	NA	Cheetah	N	NA	NA
74	74	2009-07-15	2009-07-12	2009	Mabale	Mabale	504931	7946302	505160	7946235	1	cattle	0	NA	Cheetah	N	D	NA
75	75	2009-07-15	2009-07-12	2009	Mabale	Masikili	512376	7947668	512376	7947668	1	dog	0	NA	Lion	N	N	NA
76	76	2010-10-20	2009-07-15	2009	Tsholotsho	sodaka	509062	7855280	508765	7855969	3	cattle	0	NA	Lion	N	D	NA
77	77	2009-07-17	2009-07-17	2009	Mabale	Sianyanga	504100	7954089	504870	7953790	1	cattle	0	NA	Hyaena	N	D	NA
78	78	2009-07-23	2009-07-20	2009	Tsholotsho	Ngamo	550290	7883523	550408	7883446	1	cattle	0	NA	Lion	Y	N	NA
79	79	2009-07-23	2009-07-21	2009	Tsholotsho	Ziga	548736	7876732	548736	7876932	1	cattle	0	NA	Lion	Y	N	NA
80	80	2010-10-21	2009-07-31	2009	Tsholotsho	gagwini	505751	7857780	505105	7857783	1	cattle	0	NA	Lion	N	D	NA
81	81	2009-10-08	2009-08-11	2009	Mabale	Sianyanga	503724	7954044	503874	7953947	2	goat	0	NA	Cheetah	Y	D	NA
82	82	2010-11-16	2009-08-15	2009	Tsholotsho	Manguta	534544	7853155	534865	7853719	2	cattle	0	NA	Cheetah	N	N	N
83	83	2009-09-15	2009-08-26	2009	Tsholotsho	Thokozani	0	0	0	0	1	donkey	0	NA	Hyaena	N	N	NA
84	84	2010-10-20	2009-08-31	2009	Tsholotsho	sodaka	508596	7855211	509223	7854910	1	donkey	0	NA	Lion	N	N	NA
85	85	2010-11-16	2009-08-31	2009	Tsholotsho	Mangutana	536460	7855967	536086	7856567	1	cattle	0	NA	Leopard	N	N	N
86	86	2009-06-02	2009-09-01	2009	Tsholotsho	Ngamo	550659	7883901	550104	7884467	1	cattle	0	NA	Hyaena	N	N	NA
87	87	2010-10-20	2009-09-01	2009	Tsholotsho	sodaka	509469	7855194	515866	7862606	1	cattle	0	NA	Hyaena	N	N	NA
88	88	2010-10-22	2009-09-01	2009	Tsholotsho	zanqaweni	503024	7854054	500500	7853200	1	donkey	0	NA	Hyaena	N	N	NA
89	89	2009-10-08	2009-09-24	2009	Mabale	Sianyanga	503381	7954221	503362	7954226	1	dog	0	NA	Cheetah	N	D	NA
90	90	2010-11-16	2009-09-30	2009	Tsholotsho	Mashula	539860	7861241	535500	7862500	1	donkey	0	NA	Hyaena	N	N	N
91	91	2009-10-08	2009-10-08	2009	Mabale	Sianyanga	503724	7954044	0	0	4	cattle	2	cattle	Hyaena	N	N	NA
92	92	2010-11-18	2009-10-31	2009	Tsholotsho	Mashula	539984	7861427	535500	7862500	1	donkey	0	NA	Hyaena	N	N	Y
93	93	2010-01-15	2009-11-05	2009	Mabale	Lupote	496159	7952165	494189	7949769	1	cattle	0	NA	Lion	N	D	NA
94	94	2010-01-15	2009-11-05	2009	Mabale	Lupote	496159	7952165	0	0	1	cattle	0	NA	Lion	N	D	NA
95	95	2010-10-20	2009-11-09	2009	Tsholotsho	sodaka	509485	7855262	508858	7854844	1	donkey	0	NA	Hyaena	N	N	NA
96	96	2010-01-15	2009-11-10	2009	Mabale	Lupote	497226	7951763	0	0	1	cattle	0	NA	Hyaena	N	D	NA
97	97	2010-10-29	2009-11-15	2009	Tsholotsho	gibixhegu	497983	7854449	497983	7859000	1	cattle	0	NA	Hyaena	N	N	Y
98	98	2010-01-30	2009-11-15	2009	Mabale	dopota	499064	7950530	499039	7950511	1	cattle	0	NA	Lion	Y	N	NA
99	99	2010-01-15	2009-11-30	2009	Mabale	Lupote	496159	7952165	495798	7951624	1	cattle	0	NA	Lion	N	D	NA
100	100	2010-01-15	2009-11-30	2009	Mabale	Lupote	496159	7952165	0	0	1	cattle	0	NA	Lion	N	D	NA
101	101	2010-01-15	2009-12-05	2009	Mabale	Jwapi	493974	7951293	494654	7948832	1	cattle	0	NA	Lion	N	N	NA
102	102	2010-01-30	2009-12-11	2009	Mabale	dopota	498794	7950172	498794	7950172	1	cattle	0	NA	Lion	Y	N	NA
103	103	2010-10-29	2009-12-15	2009	Tsholotsho	gibixhegu	498150	7854539	494589	7857115	2	cattle	0	NA	Lion	N	D	Y
104	104	2009-12-24	2009-12-17	2009	Mabale	Magoli	488318	7946941	488355	7946933	1	cattle	0	NA	Lion	Y	D	NA
105	105	2010-01-13	2009-12-20	2009	Mabale	Lupote	496612	7951833	496439	7951175	1	cattle	0	NA	Lion	N	N	NA
106	106	2010-01-15	2009-12-21	2009	Mabale	Lupote	497859	7951789	497955	7951821	0	NA	1	donkey	Lion	Y	N	NA
107	107	2010-10-29	2009-12-31	2009	Tsholotsho	gibixhegu	497850	7854058	497861	7854092	1	cattle	0	NA	Lion	N	NA	Y
108	108	2010-10-29	2009-12-31	2009	Tsholotsho	gibixhegu	497850	7854058	497861	7854092	1	donkey	0	NA	Lion	N	NA	Y
109	109	2010-10-29	2009-12-31	2009	Tsholotsho	gibixhegu	497837	7854513	492500	7856100	1	cattle	0	NA	Hyaena	N	N	N
110	110	2010-10-20	2010-01-01	2010	Tsholotsho	sodaka	509344	7855202	509355	7854975	1	donkey	0	NA	Hyaena	N	N	NA
111	111	2010-09-08	2010-01-01	2010	Mabale	Chimwara	534262	7929735	533544	7928662	1	cattle	0	NA	Lion	N	D	NA
112	112	2010-09-08	2010-01-01	2010	Mabale	Chimwara	534262	7929735	0	0	1	cattle	0	NA	Lion	N	D	NA
113	113	2010-01-15	2010-01-03	2010	Mabale	Lupote	497681	7951797	497728	7949781	0	NA	1	cattle	Lion	N	N	NA
114	114	2010-01-15	2010-01-05	2010	Mabale	Lupote	492587	7951265	492462	7950660	1	cattle	0	NA	Lion	N	N	NA
115	115	2010-01-15	2010-01-10	2010	Mabale	Jwapi	494178	7950819	495217	7950419	1	cattle	0	NA	Lion	N	N	NA
116	116	2010-01-15	2010-01-10	2010	Mabale	Jwapi	493974	7951293	495303	7950429	1	cattle	0	NA	Lion	N	N	NA
117	117	2010-10-21	2010-01-15	2010	Tsholotsho	emanaleni	499819	7857560	499784	7857294	1	donkey	0	NA	Hyaena	N	N	NA
118	118	2010-01-30	2010-01-22	2010	Mabale	Dopota	499064	7950530	499046	7950518	2	donkey	0	NA	Hyaena	Y	N	NA
119	119	2010-01-30	2010-01-22	2010	Mabale	Lupote	496509	7952143	496594	7951147	2	goat	0	NA	Lion	N	D	NA
120	120	2010-01-30	2010-01-22	2010	Mabale	Lupote	496509	7952143	0	0	2	goat	0	NA	Lion	N	D	NA
121	121	2010-01-30	2010-01-25	2010	Mabale	Jwapi	494480	7951707	494486	7951680	2	goat	0	NA	Lion	Y	N	NA
122	122	2010-11-08	2010-01-31	2010	Tsholotsho	Manjelengwa	539489	7869625	538964	7871244	2	donkey	0	NA	Lion	N	N	Y
123	123	2010-11-21	2010-01-31	2010	Tsholotsho	Manjelengwa	539489	7869625	538870	7871270	2	cattle	1	cattle	Lion	N	N	Y
124	124	2010-10-07	2010-02-01	2010	Tsholotsho	Vulashaba	534265	7869537	532728	7873114	0	NA	1	cattle	Lion	N	D	NA
125	125	2010-10-20	2010-02-01	2010	Tsholotsho	sodaka	509344	7855202	509514	7855063	1	donkey	0	NA	Hyaena	Y	N	NA
126	126	2010-10-30	2010-02-01	2010	Tsholotsho	bemba	529009	7849371	529500	7852500	1	cattle	0	NA	Leopard	N	D	Y
127	127	2010-02-23	2010-02-04	2010	Mabale	Mabale	504893	7947782	504891	7947818	1	goat	0	NA	Hyaena	Y	N	NA
128	128	2010-03-11	2010-02-05	2010	Tsholotsho	mlevusiyaznia	546223	7869854	547309	7872777	1	donkey	0	NA	Hyaena	N	NA	NA
129	129	2010-02-08	2010-02-07	2010	Tsholotsho	Gwenga	542568	7870362	542571	7874327	1	cattle	0	NA	Lion	N	D	NA
130	130	2010-02-19	2010-02-08	2010	Tsholotsho	Mlevu	546254	7868290	544489	7874817	2	cattle	1	cattle	Lion	N	D	NA
131	131	2010-05-05	2010-02-15	2010	Tsholotsho	Ndodana	524564	7863921	524031	7864012	1	donkey	0	NA	Hyaena	N	N	NA
132	132	2010-10-22	2010-02-15	2010	Tsholotsho	zanqaweni	503482	7854287	501539	7855944	1	donkey	0	NA	Hyaena	N	N	NA
133	133	2010-10-30	2010-02-15	2010	Tsholotsho	bemba	529108	7849180	528500	7853900	2	cattle	0	NA	Lion	N	D	Y
134	134	2011-02-11	2010-02-15	2010	Mabale	Chimwaravillage3	533194	7930827	531807	7930414	1	cattle	0	NA	Lion	N	D	NA
135	135	2011-04-07	2010-02-15	2010	Tsholotsho	Ndodana	525860	7864527	525370	7864242	2	goat	0	NA	Lion	Y	N	Y
136	136	2010-02-23	2010-02-18	2010	Mabale	Mabale	505890	7944361	505890	7944361	2	goat	0	NA	Lion	Y	N	NA
137	137	2010-02-23	2010-02-18	2010	Mabale	Mabale	504521	7945897	503781	7945924	5	cattle	0	NA	Lion	N	D	NA
138	138	2010-02-23	2010-02-21	2010	Mabale	Mabale	504072	7947033	501403	7946616	1	cattle	0	NA	Lion	N	D	NA
139	139	2010-02-27	2010-02-26	2010	Tsholotsho	gwenga	542325	7870261	0	0	1	donkey	0	NA	Hyaena	N	N	NA
140	140	2010-10-19	2010-03-01	2010	Tsholotsho	sodaka	510316	7855051	513137	7857912	1	cattle	0	NA	Hyaena	N	N	NA
141	141	2010-10-22	2010-03-01	2010	Tsholotsho	makeni	522951	7857611	521489	7858546	1	cattle	0	NA	Hyaena	N	N	NA
142	142	2010-03-04	2010-03-03	2010	Tsholotsho	Nganyana	549455	7882637	547431	7884907	5	cattle	0	NA	Lion	N	D	NA
143	143	2010-03-05	2010-03-04	2010	Tsholotsho	BeseniaNdlovu	550634	7883788	547554	7885477	5	cattle	0	NA	Lion	N	N	NA
144	144	2010-03-09	2010-03-08	2010	Tsholotsho	ziga	550145	7874949	547752	7873815	5	cattle	0	NA	Lion	N	N	NA
145	145	2010-03-09	2010-03-08	2010	Tsholotsho	Mlevu	546445	7869778	545653	7875078	1	cattle	1	cattle	Lion	N	D	NA
146	146	2010-03-10	2010-03-08	2010	Tsholotsho	Vozheka	554636	7883540	549736	7885110	1	cattle	0	NA	Hyaena	N	N	NA
147	147	2010-06-02	2010-03-08	2010	Tsholotsho	Ngamo	551323	7885350	551603	7886836	1	cattle	0	NA	Hyaena	N	N	NA
148	148	2010-03-10	2010-03-09	2010	Tsholotsho	kapanyana	0	0	549485	7871300	1	donkey	0	NA	Lion	N	N	NA
149	149	2010-05-05	2010-03-10	2010	Tsholotsho	Vulashaba	533989	7868836	535342	7868736	0	NA	1	donkey	Lion	N	N	NA
150	150	2010-05-05	2010-03-10	2010	Tsholotsho	Vulashaba	534008	7868919	533343	7868737	2	donkey	0	NA	Lion	N	N	NA
151	151	2010-05-05	2010-03-10	2010	Tsholotsho	Vulashaba	534006	7869002	533317	7868808	2	donkey	0	NA	Lion	N	N	NA
152	152	2010-10-21	2010-03-15	2010	Tsholotsho	zanqaweni	503116	7854224	505042	7851391	1	donkey	1	donkey	Leopard	N	D	NA
153	153	2010-10-21	2010-03-15	2010	Tsholotsho	sodaka	508759	7855281	508752	7855260	1	goat	0	NA	Leopard	Y	N	NA
154	154	2010-10-22	2010-03-15	2010	Tsholotsho	sodaka	509690	7855013	510548	7855198	2	goat	0	NA	Leopard	N	N	NA
155	155	2010-10-22	2010-03-15	2010	Tsholotsho	makeni	522951	7857611	521225	7856694	1	cattle	0	NA	Hyaena	N	N	NA
156	156	2010-10-22	2010-03-15	2010	Tsholotsho	makeni	522951	7857611	521936	7858142	1	cattle	0	NA	Hyaena	N	N	NA
157	157	2010-03-30	2010-03-24	2010	Tsholotsho	Zandile	549856	7879168	550918	7879042	1	cattle	0	NA	Hyaena	N	N	NA
158	158	2010-05-19	2010-03-29	2010	Tsholotsho	bemba	529072	7849252	529278	7849131	8	goat	0	NA	Leopard	N	D	NA
159	159	2010-05-18	2010-03-30	2010	Tsholotsho	Mlevu	545062	7869307	546126	7870066	1	donkey	0	NA	Lion	N	N	NA
160	160	2010-10-21	2010-03-30	2010	Tsholotsho	emanaleni	499819	7857560	499634	7857226	2	cattle	0	NA	Hyaena	N	N	NA
161	161	2010-10-22	2010-03-30	2010	Tsholotsho	makeni	522951	7857611	521875	7857597	1	cattle	0	NA	Hyaena	N	N	NA
162	162	2010-05-04	2010-03-31	2010	Tsholotsho	Mhlabeni	538058	7872551	538006	7872630	1	donkey	0	NA	Lion	N	N	NA
163	163	2010-05-19	2010-03-31	2010	Tsholotsho	Mlevu	546048	7870204	545492	7869634	1	donkey	2	donkey	Lion	N	N	NA
164	164	2010-10-20	2010-03-31	2010	Tsholotsho	sodaka	509062	7855280	507662	7855420	1	donkey	0	NA	Hyaena	N	N	NA
165	165	2010-05-04	2010-04-01	2010	Mabale	Lupote	497016	7951614	496034	7948074	1	cattle	0	NA	Lion	N	D	NA
166	166	2010-04-03	2010-04-02	2010	Tsholotsho	Zandile	549670	7879521	550881	7880480	1	cattle	0	NA	Hyaena	N	N	NA
167	167	2010-05-19	2010-04-03	2010	Tsholotsho	Mlevu	546937	7870299	547175	7869894	4	cattle	0	NA	Lion	Y	N	NA
168	168	2010-05-18	2010-04-04	2010	Tsholotsho	kapanyana	549969	7871220	549417	7872065	3	cattle	1	cattle	Lion	N	D	NA
169	169	2010-04-07	2010-04-06	2010	Tsholotsho	Manjelengwa	539733	7869022	539973	7869463	1	donkey	0	NA	Lion	N	N	NA
170	170	2010-04-07	2010-04-06	2010	Tsholotsho	Manjelengwa	539733	7869022	539973	7869463	1	dog	0	NA	Lion	N	N	NA
171	171	2010-04-07	2010-04-06	2010	Tsholotsho	Manjelengwa	539615	7869301	539993	7869543	2	donkey	0	NA	Lion	N	N	NA
172	172	2010-05-05	2010-04-08	2010	Tsholotsho	Ndodana	524564	7863921	520327	7861912	1	cattle	0	NA	Hyaena	N	N	NA
173	173	2010-05-18	2010-04-09	2010	Tsholotsho	kapanyana	549969	7871220	548680	7871284	1	donkey	0	NA	Lion	N	N	NA
174	174	2010-10-19	2010-04-09	2010	Tsholotsho	nsingweni	514200	7854614	515970	7855866	1	cattle	0	NA	Hyaena	N	N	NA
175	175	2010-04-11	2010-04-10	2010	Tsholotsho	Zandile	549136	7878798	548743	7878752	1	donkey	0	NA	Lion	Y	N	NA
176	176	2010-10-29	2010-04-15	2010	Tsholotsho	gibixhegu	497453	7854269	497418	7855236	1	cattle	1	cattle	Lion	N	N	N
177	177	2010-10-30	2010-04-15	2010	Tsholotsho	bemba	529356	7858913	534500	7850000	2	goat	0	NA	Leopard	N	D	N
178	178	2010-10-30	2010-04-15	2010	Tsholotsho	bemba	529009	7849371	528500	7853900	8	cattle	1	cattle	Lion	N	D	N
179	179	2010-12-16	2010-04-15	2010	Mabale	Chimwaravillage2	534774	7929150	534480	7928718	1	cattle	0	NA	Leopard	N	D	NA
180	180	2010-10-21	2010-04-19	2010	Tsholotsho	emanaleni	500054	7857586	500575	7860984	2	donkey	0	NA	Lion	NA	NA	NA
181	181	2010-05-19	2010-04-20	2010	Tsholotsho	mlevu	545062	7869307	544940	7868929	1	donkey	0	NA	Hyaena	N	N	NA
182	182	2010-04-22	2010-04-21	2010	Tsholotsho	Tshefutshefu	559938	7880718	548423	7884707	2	cattle	0	NA	Lion	N	N	NA
183	183	2010-04-27	2010-04-24	2010	Tsholotsho	stambalizinkwakwe	552160	7883882	550850	7884819	1	cattle	0	NA	Lion	N	N	NA
184	184	2010-04-27	2010-04-24	2010	Tsholotsho	Ngamo	550520	7884774	550625	7884981	6	goat	1	goat	Lion	N	N	NA
185	185	2010-04-27	2010-04-24	2010	Tsholotsho	Ngamo	550755	7885201	553625	7884981	4	goat	0	NA	Lion	N	N	NA
186	186	2010-05-04	2010-04-25	2010	Mabale	Lupote	496509	7952146	496563	7947723	1	cattle	0	NA	Lion	N	D	NA
187	187	2010-05-04	2010-04-25	2010	Mabale	Lupote	496509	7952146	0	0	1	cattle	0	NA	Lion	N	D	NA
188	188	2010-04-27	2010-04-25	2010	Tsholotsho	Ngamo	550666	7885218	550615	7885063	1	cattle	0	NA	Lion	Y	N	NA
189	189	2010-05-04	2010-04-26	2010	Mabale	Lupote	496509	7952146	496057	7948928	1	cattle	0	NA	Hyaena	N	D	NA
190	190	2010-05-04	2010-04-26	2010	Mabale	Lupote	496509	7952146	0	0	1	cattle	1	cattle	Hyaena	N	D	NA
191	191	2010-10-22	2010-04-30	2010	Tsholotsho	zanqaweni	503116	7854224	502498	7855177	1	donkey	0	NA	Hyaena	N	N	NA
192	192	2010-10-22	2010-04-30	2010	Tsholotsho	makeni	522951	7857611	522803	7856552	1	donkey	0	NA	Lion	N	N	NA
193	193	2010-11-18	2010-05-01	2010	Tsholotsho	Mashula	539781	7861510	535500	7862500	2	donkey	0	NA	Hyaena	N	N	N
194	194	2010-05-04	2010-05-02	2010	Tsholotsho	Ndodana	524937	7864228	524386	7864067	1	cattle	0	NA	Lion	N	N	NA
195	195	2010-05-19	2010-05-02	2010	Tsholotsho	kapanyana	548287	7870484	549095	7870633	1	donkey	1	donkey	Lion	Y	D	NA
196	196	2010-05-04	2010-05-03	2010	Mabale	Lupote	497016	7951611	496034	7948074	2	cattle	1	cattle	Lion	N	D	NA
197	197	2010-05-19	2010-05-03	2010	Tsholotsho	kapanyana	549693	7870702	548890	7871191	2	donkey	0	NA	Lion	N	D	NA
198	198	2010-06-23	2010-05-04	2010	Mabale	Lupote	497168	7951887	497233	7951062	1	goat	0	NA	Lion	N	D	NA
199	199	2010-05-05	2010-05-04	2010	Tsholotsho	Ndodana	524767	7864260	525143	7864374	4	goat	0	NA	Lion	Y	N	NA
200	200	2010-08-19	2010-05-14	2010	Tsholotsho	mlevu	545449	7869474	0	0	1	cattle	0	NA	Hyaena	N	N	NA
201	201	2010-05-19	2010-05-15	2010	Tsholotsho	vusani	532856	7851330	534041	7857919	3	cattle	0	NA	Lion	N	D	NA
202	202	2010-05-19	2010-05-15	2010	Tsholotsho	zamazamamanguta	534291	7853252	533815	7858111	1	cattle	0	NA	Lion	N	N	NA
203	203	2010-10-20	2010-05-15	2010	Tsholotsho	matetshaneni	507368	7855085	507577	7854730	1	donkey	0	NA	Hyaena	N	N	NA
204	204	2010-10-22	2010-05-15	2010	Tsholotsho	sodaka	508759	7855281	506355	7856629	1	cattle	0	NA	Hyaena	N	N	NA
205	205	2011-04-08	2010-05-15	2010	Tsholotsho	janiza	547238	7867029	547394	7867308	1	cattle	0	NA	Hyaena	N	D	N
206	206	2011-04-29	2010-05-15	2010	Tsholotsho	Dibutibu	570899	7890359	572236	7890562	1	donkey	0	NA	Hyaena	N	N	N
207	207	2010-10-29	2010-05-15	2010	Tsholotsho	gibixhegu	497837	7854513	494000	7854800	1	cattle	0	NA	Hyaena	N	D	Y
208	208	2010-05-18	2010-05-17	2010	Tsholotsho	Mlevu	546156	7869312	546698	7869799	1	donkey	0	NA	Lion	N	N	NA
209	209	2010-05-18	2010-05-17	2010	Tsholotsho	mlevu	546375	7869796	546827	7870466	2	donkey	0	NA	Lion	N	N	NA
210	210	2010-05-18	2010-05-17	2010	Tsholotsho	ziga	548762	7876729	548722	7876677	1	donkey	0	NA	Lion	N	N	NA
211	211	2010-10-29	2010-05-18	2010	Tsholotsho	majabani	548443	7866296	547057	7855928	1	donkey	0	NA	Lion	N	D	NA
212	212	2010-06-10	2010-05-25	2010	Mabale	Mabale	508527	7947960	509029	7946558	1	donkey	0	NA	Hyaena	N	D	NA
213	213	2010-10-19	2010-05-25	2010	Tsholotsho	nsingweni	513698	7854732	513830	7854762	1	donkey	0	NA	Lion	Y	N	NA
214	214	2010-11-11	2010-05-25	2010	Tsholotsho	gwabazabuya	499712	7852153	497477	7852157	1	cattle	0	NA	Lion	N	D	Y
215	215	2010-06-02	2010-05-27	2010	Tsholotsho	gwabazabuya	0	0	0	0	2	cattle	0	NA	Lion	NA	NA	NA
216	216	2010-06-02	2010-05-30	2010	Tsholotsho	makeni	522964	7850818	520337	7854544	1	cattle	2	cattle	Lion	N	N	NA
217	217	2011-04-28	2010-05-30	2010	Tsholotsho	Dibutibu	569507	7886638	569043	7888152	2	donkey	0	NA	Hyaena	N	N	Y
218	218	2010-10-06	2010-05-31	2010	Tsholotsho	umtshayeli	535970	7864912	537077	7864865	3	goat	0	NA	Hyaena	N	N	NA
219	219	2010-10-20	2010-05-31	2010	Tsholotsho	sodaka	509062	7855280	509101	7855157	1	donkey	0	NA	Hyaena	N	N	NA
220	220	2010-09-08	2010-06-01	2010	Mabale	chimwara	534262	7929735	534290	7929761	2	cattle	0	NA	Lion	Y	N	NA
221	221	2010-06-02	2010-06-01	2010	Tsholotsho	sihazela	520534	7854319	519963	7854198	1	donkey	0	NA	Lion	N	N	NA
222	222	2010-06-10	2010-06-04	2010	Mabale	Magoli	487247	7946908	488758	7946859	1	donkey	0	NA	Lion	N	D	NA
223	223	2010-11-11	2010-06-04	2010	Tsholotsho	gwabazabuya	500257	7852616	500200	7853950	4	cattle	0	NA	Hyaena	N	N	Y
224	224	2010-06-10	2010-06-05	2010	Mabale	Mabale	509938	7946597	509956	7946677	1	goat	0	NA	Lion	N	N	NA
225	225	2010-10-20	2010-06-15	2010	Tsholotsho	matetshaneni	507368	7855085	507623	7854907	1	goat	0	NA	Hyaena	N	N	NA
226	226	2010-10-22	2010-06-15	2010	Tsholotsho	zanqaweni	502731	7854130	502727	7854204	2	donkey	0	NA	Lion	Y	N	NA
227	227	2010-11-16	2010-06-15	2010	Tsholotsho	Mangutana	536460	7855967	537406	7856260	1	donkey	0	NA	Hyaena	N	N	N
228	228	2010-11-16	2010-06-15	2010	Tsholotsho	Mangutana	537060	7856251	538500	7856500	1	cattle	0	NA	Lion	N	D	N
229	229	2011-04-05	2010-06-15	2010	Tsholotsho	bemba	529091	7849257	528953	7849234	1	cattle	0	NA	Lion	N	N	N
230	230	2011-04-08	2010-06-15	2010	Tsholotsho	janiza	546056	7866728	546130	7866735	1	donkey	0	NA	Hyaena	N	N	Y
231	231	2011-06-01	2010-06-15	2010	Tsholotsho	Pumula	556764	7860763	555779	7860415	1	cattle	0	NA	Hyaena	N	N	N
232	232	2011-06-02	2010-06-15	2010	Tsholotsho	Hobho	572716	7894503	568894	7892394	1	cattle	0	NA	Hyaena	N	N	Y
233	233	2011-02-19	2010-06-25	2010	Mabale	Gundwane	542435	7928895	542216	7927528	1	donkey	0	NA	Hyaena	N	N	NA
234	234	2010-10-22	2010-06-29	2010	Mabale	Makhulumo	497328	7952404	497335	7952353	3	goat	0	NA	Hyaena	N	N	NA
235	235	2010-09-08	2010-07-01	2010	Mabale	Chimwara	534698	7929068	534723	7929037	1	cattle	0	NA	Lion	Y	N	NA
236	236	2010-09-08	2010-07-01	2010	Mabale	Chimwara	534698	7929068	534723	7929037	1	cattle	0	NA	Lion	Y	N	NA
237	237	2010-09-08	2010-07-01	2010	Mabale	Chimwara	534773	7929158	534780	7929127	3	goat	0	NA	Lion	Y	N	NA
238	238	2010-09-08	2010-07-01	2010	Mabale	Chimwara	536644	7931018	534533	7930384	4	cattle	1	cattle	Lion	N	D	NA
239	239	2010-09-08	2010-07-01	2010	Mabale	Chimwara	536644	7931018	0	0	4	cattle	0	NA	Lion	N	D	NA
240	240	2011-06-22	2010-07-01	2010	Mabale	Mambanje	477524	7950319	477516	7950305	1	goat	0	NA	Leopard	Y	N	NA
241	241	2011-06-02	2010-07-01	2010	Tsholotsho	Hobho	572486	7894656	572475	7894684	1	cattle	0	NA	Lion	Y	N	Y
242	242	2011-02-20	2010-07-03	2010	Mabale	Gundwane	541465	7929624	541501	7929632	2	donkey	0	NA	Lion	N	N	NA
243	243	2010-10-08	2010-07-04	2010	Tsholotsho	Vulashaba	534319	7869772	533081	7868305	2	donkey	0	NA	Hyaena	N	N	NA
244	244	2010-10-17	2010-07-06	2010	Tsholotsho	umtshayeli	535415	7864495	535842	7861628	1	donkey	0	NA	Lion	N	D	NA
245	245	2010-08-10	2010-07-11	2010	Tsholotsho	Vulashaba	534319	7869772	533355	7868398	1	donkey	0	NA	Hyaena	N	N	NA
246	246	2010-10-20	2010-07-15	2010	Tsholotsho	sodaka	509062	7855280	507314	7857159	1	cattle	0	NA	Hyaena	N	N	NA
247	247	2010-11-11	2010-07-15	2010	Tsholotsho	gwabazabuya	500152	7852354	500770	7855287	1	donkey	0	NA	Hyaena	N	N	Y
248	248	2011-03-08	2010-07-15	2010	Mabale	Gundwane	541948	7928734	542218	7927528	1	donkey	0	NA	Lion	N	N	NA
249	249	2010-12-09	2010-07-15	2010	Tsholotsho	Manjelengwa	539852	7869550	539820	7869558	1	donkey	0	NA	Lion	N	N	N
250	250	2012-01-20	2010-07-16	2010	Mabale	Mazwa	529093	7939247	529076	7939243	10	goat	0	NA	Lion	Y	N	NA
251	251	2012-01-20	2010-07-16	2010	Mabale	Mazwa	529093	7939247	529076	7939243	8	sheep	0	NA	Lion	Y	N	NA
252	252	2010-12-09	2010-07-30	2010	Tsholotsho	Manjelengwa	539807	7869076	538676	7870127	1	donkey	0	NA	Lion	N	N	Y
253	253	2010-10-30	2010-07-31	2010	Tsholotsho	bemba	529009	7849371	529251	7848895	4	donkey	1	donkey	Hyaena	N	N	Y
254	254	2010-12-09	2010-07-31	2010	Tsholotsho	Manjelengwa	539296	7869786	540896	7870156	1	donkey	0	NA	Lion	N	N	Y
255	255	2010-09-08	2010-08-01	2010	Mabale	chimwara	534262	7929735	535311	7928258	3	cattle	0	NA	Lion	N	D	NA
256	256	2010-09-08	2010-08-01	2010	Mabale	chimwara	534262	7929735	535311	7928258	5	donkey	0	NA	Lion	N	D	NA
257	257	2010-10-20	2010-08-01	2010	Tsholotsho	matetshaneni	507368	7885085	507926	7855327	1	goat	0	NA	Leopard	N	N	NA
258	258	2010-10-21	2010-08-01	2010	Tsholotsho	matetshaneni	506624	7855007	505949	7854400	1	donkey	0	NA	Hyaena	N	N	NA
259	259	2010-10-21	2010-08-01	2010	Tsholotsho	matetshaneni	506419	7855170	506422	7855164	1	cattle	0	NA	Lion	Y	N	NA
260	260	2010-11-16	2010-08-05	2010	Tsholotsho	Mangutana	536460	7855967	536086	7855567	1	donkey	0	NA	Hyaena	N	N	N
261	261	2010-10-21	2010-08-07	2010	Tsholotsho	matetshaneni	506624	7855007	506864	7854780	1	donkey	0	NA	Hyaena	N	N	NA
262	262	2010-10-21	2010-08-14	2010	Tsholotsho	matetshaneni	506419	7855170	506332	7854823	1	donkey	0	NA	Lion	N	N	NA
263	263	2010-09-15	2010-08-15	2010	Tsholotsho	Nganyana	549259	7882318	548511	7884765	1	donkey	0	NA	Hyaena	N	N	NA
264	264	2010-10-20	2010-08-15	2010	Tsholotsho	matetshaneni	507368	7855085	505208	7854171	2	cattle	1	cattle	Hyaena	N	N	NA
265	265	2010-10-30	2010-08-15	2010	Tsholotsho	bemba	529009	7849371	532600	7853900	2	cattle	0	NA	Hyaena	N	N	N
266	266	2011-04-28	2010-08-15	2010	Tsholotsho	Dibutibu	573542	7888477	572795	7889667	1	donkey	0	NA	Hyaena	N	N	N
267	267	2011-08-03	2010-08-15	2010	Mabale	Gundwane	541389	7928438	543130	7926218	1	cattle	0	NA	Lion	N	N	NA
268	268	2011-04-28	2010-08-15	2010	Tsholotsho	Dibutibu	572921	7888500	572795	7889667	1	cattle	0	NA	Hyaena	N	N	N
269	269	2011-07-28	2010-08-15	2010	Tsholotsho	sodaka	509379	7855253	510157	7849561	1	donkey	0	NA	Lion	N	N	NA
270	270	2010-09-15	2010-08-19	2010	Tsholotsho	Tshefutshefu	559634	7880786	557560	7880836	1	cattle	0	NA	Hyaena	N	D	NA
271	271	2010-08-26	2010-08-26	2010	Tsholotsho	Nganyana	0	0	548112	7886722	2	cattle	0	NA	Hyaena	NA	NA	NA
272	272	2010-08-26	2010-08-26	2010	Tsholotsho	Nganyana	0	0	548112	7886722	2	donkey	0	NA	Hyaena	NA	NA	NA
273	273	2010-09-08	2010-08-27	2010	Mabale	Chimwara	536799	7931660	535644	7932754	3	donkey	0	NA	Lion	N	N	NA
274	274	2010-09-08	2010-08-27	2010	Mabale	Chimwara	536799	7931660	0	0	3	donkey	0	NA	Lion	N	N	NA
275	275	2010-10-08	2010-08-31	2010	Tsholotsho	Vulashaba	0	0	0	0	1	donkey	0	NA	Lion	NA	NA	NA
276	276	2010-10-20	2010-08-31	2010	Tsholotsho	matetshaneni	506365	7855077	504486	7855550	1	cattle	0	NA	Hyaena	N	N	NA
277	277	2010-10-21	2010-08-31	2010	Tsholotsho	matetshaneni	506419	7855170	504561	7856831	1	donkey	0	NA	Lion	N	N	NA
278	278	2011-04-08	2010-08-31	2010	Tsholotsho	ziga	549413	7875424	549181	7875734	1	donkey	0	NA	Hyaena	N	N	N
279	279	2011-04-28	2010-08-31	2010	Tsholotsho	Dibutibu	567968	7887424	566911	7887008	1	donkey	0	NA	Hyaena	N	N	Y
280	280	2010-10-20	2010-08-31	2010	Tsholotsho	sodaka	509062	7855280	509712	7856045	1	donkey	0	NA	Hyaena	N	N	NA
281	281	2010-10-20	2010-09-01	2010	Tsholotsho	mazilingwane	516320	7853581	515578	7853974	2	goat	0	NA	Hyaena	N	N	NA
282	282	2010-10-22	2010-09-01	2010	Tsholotsho	zanqaweni	503482	7854287	503457	7853268	1	donkey	0	NA	Hyaena	N	N	NA
283	283	2011-04-29	2010-09-01	2010	Tsholotsho	Dibutibu	570639	7890330	568071	7887693	1	cattle	0	NA	Hyaena	N	N	Y
284	284	2010-09-08	2010-09-02	2010	Mabale	gwaairanch	519986	7942565	519988	7942564	2	donkey	0	NA	Lion	Y	N	NA
285	285	2010-02-15	2010-09-02	2010	Tsholotsho	Thokozani	0	0	0	0	1	cattle	0	NA	Hyaena	N	N	NA
286	286	2010-09-08	2010-09-04	2010	Mabale	Chimwara	534698	7929068	534495	7928706	1	cattle	0	NA	Lion	N	N	NA
287	287	2010-09-08	2010-09-04	2010	Mabale	Chimwara	534698	7929068	0	0	1	cattle	0	NA	Lion	N	N	NA
288	288	2010-10-22	2010-09-10	2010	Mabale	Siabuyungwi3	498969	7951694	498926	7951704	2	goat	0	NA	Hyaena	Y	N	NA
289	289	2010-09-17	2010-09-10	2010	Tsholotsho	Mhlabeni	538348	7872425	537676	7872159	1	donkey	0	NA	Lion	N	N	NA
290	290	2010-09-16	2010-09-11	2010	Tsholotsho	Ngamo	550686	7884414	550493	7883828	1	donkey	0	NA	Hyaena	N	N	NA
291	291	2010-09-20	2010-09-13	2010	Tsholotsho	Vozheka	0	0	0	0	1	cattle	0	NA	Hyaena	N	D	NA
292	292	2010-09-17	2010-09-14	2010	Tsholotsho	Manjelengwa	539653	7869296	0	0	1	donkey	0	NA	Lion	N	N	NA
293	293	2010-11-18	2010-09-15	2009	Tsholotsho	Mashula	540284	7861072	541000	7858500	1	cattle	0	NA	Hyaena	N	N	Y
294	294	2010-09-23	2010-09-15	2010	Tsholotsho	Nganyana	548738	7881809	548695	7881932	1	donkey	0	NA	Hyaena	N	N	NA
295	295	2010-09-23	2010-09-15	2010	Tsholotsho	Nganyana	549615	7882287	549149	7882876	1	donkey	0	NA	Hyaena	N	N	NA
296	296	2010-10-22	2010-09-15	2010	Tsholotsho	zanqaweni	503024	7854054	503080	7853845	1	donkey	0	NA	Hyaena	N	N	NA
297	297	2010-10-30	2010-09-15	2010	Tsholotsho	bemba	529009	7849371	528500	7853900	1	cattle	0	NA	Hyaena	N	N	N
298	298	2010-11-11	2010-09-15	2010	Tsholotsho	gwabazabuya	500257	7852616	500743	7850933	1	cattle	0	NA	Lion	N	N	N
299	299	2010-11-11	2010-09-15	2010	Tsholotsho	gwabazabuya	500115	7852375	500801	7853569	2	donkey	0	NA	Hyaena	N	N	N
300	300	2010-11-11	2010-09-15	2010	Tsholotsho	gwabazabuya	500197	7852211	502919	7854073	1	cattle	0	NA	Lion	N	D	N
301	301	2010-12-08	2010-09-15	2010	Tsholotsho	Mhlabeni	538349	7872429	538617	7873210	1	donkey	0	NA	Lion	N	D	NA
302	302	2011-04-08	2010-09-15	2010	Tsholotsho	Janiza	547279	7867046	547189	7867116	1	donkey	0	NA	Hyaena	N	N	N
303	303	2011-04-29	2010-09-15	2010	Tsholotsho	Dibutibu	570953	7890433	570714	7887739	1	goat	0	NA	Hyaena	Y	N	N
304	304	2011-04-29	2010-09-15	2010	Tsholotsho	Dibutibu	570953	7890433	569624	7889721	1	goat	0	NA	Hyaena	Y	N	N
305	305	2011-02-11	2010-09-15	2010	Mabale	Chimwaravillage3	533194	7930827	533104	7929700	1	cattle	0	NA	Lion	N	N	NA
306	306	2011-04-29	2010-09-15	2010	Tsholotsho	Dibutibu	571012	7800610	570473	7890603	2	cattle	0	NA	Lion	N	D	N
307	307	2010-10-22	2010-09-18	2010	Tsholotsho	zanqaweni	503024	7854054	502854	7853809	1	donkey	0	NA	Hyaena	N	N	NA
308	308	2011-04-28	2010-09-27	2010	Tsholotsho	Dibutibu	571376	7890771	572252	7890120	3	goat	0	NA	Hyaena	Y	N	N
309	309	2010-12-10	2010-09-30	2010	Tsholotsho	Manjelengwa	539489	7869625	539539	7870975	1	donkey	0	NA	Lion	N	N	Y
310	310	2011-04-08	2010-09-30	2010	Tsholotsho	Bonke	539787	7864281	539890	7864341	1	donkey	0	NA	Hyaena	N	N	Y
311	311	2010-10-05	2010-10-01	2010	Tsholotsho	mlevu	0	0	0	0	2	cattle	0	NA	Hyaena	N	N	NA
312	312	2010-10-19	2010-10-01	2010	Tsholotsho	sodaka	510316	7855051	509970	7855289	1	donkey	0	NA	Hyaena	N	N	NA
313	313	2011-06-22	2010-10-01	2010	Mabale	Mambanje	477984	7950607	476135	7951372	2	cattle	0	NA	Leopard	N	D	NA
314	314	2011-06-22	2010-10-01	2010	Mabale	Mambanje	477984	7950607	476135	7951372	2	cattle	0	NA	Leopard	N	D	NA
315	315	2011-06-02	2010-10-01	2010	Tsholotsho	Hobho	571829	7896343	571685	7896636	2	cattle	0	NA	Lion	N	N	Y
316	316	2010-10-05	2010-10-03	2010	Tsholotsho	Manjelengwa	0	0	0	0	1	cattle	0	NA	Lion	NA	NA	NA
317	317	2010-10-07	2010-10-05	2010	Tsholotsho	ziga	550075	7875812	548974	7877891	1	donkey	0	NA	Hyaena	N	N	NA
320	320	2010-10-19	2010-10-14	2010	Tsholotsho	Mhlabeni	0	0	0	0	1	cattle	1	cattle	Lion	NA	NA	NA
321	321	2010-12-16	2010-10-15	2010	Mabale	Chimwaravillage4	533015	7932265	534418	7929635	1	cattle	0	NA	Lion	N	D	NA
322	322	2010-12-16	2010-10-15	2010	Mabale	Chimwaravillage5	535031	7932847	532620	7933213	1	donkey	0	NA	Lion	N	N	NA
323	323	2010-11-12	2010-10-15	2010	Tsholotsho	vusani	531781	7850042	531256	7849031	1	donkey	1	donkey	Leopard	N	D	Y
324	324	2010-12-09	2010-10-15	2010	Tsholotsho	Manjelengwa	539296	7869786	540951	7870198	1	cattle	0	NA	Hyaena	N	N	Y
325	325	2011-04-08	2010-10-15	2010	Tsholotsho	Bonke	539670	7864294	539683	7864359	1	donkey	0	NA	Hyaena	N	N	Y
326	326	2011-04-28	2010-10-15	2010	Tsholotsho	Dibutibu	569692	7886212	565622	7885966	1	cattle	0	NA	Hyaena	N	N	Y
327	327	2011-04-28	2010-10-15	2010	Tsholotsho	Dibutibu	570486	7885299	573391	7886255	1	cattle	0	NA	Hyaena	N	N	Y
328	328	2011-04-28	2010-10-15	2010	Tsholotsho	Dibutibu	570486	7885299	567363	7886782	1	donkey	0	NA	Hyaena	N	N	N
329	329	2011-04-29	2010-10-15	2010	Tsholotsho	Dibutibu	572183	7890868	568071	7887693	1	cattle	0	NA	Hyaena	N	N	N
330	330	2011-04-29	2010-10-15	2010	Tsholotsho	Dibutibu	572183	7890868	571950	7889879	3	donkey	0	NA	Hyaena	N	N	N
331	331	2011-04-29	2010-10-15	2010	Tsholotsho	Dibutibu	570828	7890490	572301	7890020	1	cattle	0	NA	Lion	N	N	N
332	332	2011-04-29	2010-10-15	2010	Tsholotsho	Dibutibu	571951	7891333	569026	7890392	3	cattle	0	NA	Hyaena	N	N	N
333	333	2011-04-29	2010-10-15	2010	Tsholotsho	Dibutibu	570899	7890359	569026	7891296	2	cattle	0	NA	Lion	N	D	Y
334	334	2011-04-29	2010-10-15	2010	Tsholotsho	Dibutibu	570953	7890433	570202	7891296	2	cattle	0	NA	Hyaena	N	D	Y
335	335	2010-10-19	2010-10-16	2010	Tsholotsho	Nganyana	548213	7881745	548097	7879861	1	donkey	0	NA	Hyaena	N	N	NA
336	336	2010-10-19	2010-10-17	2010	Tsholotsho	Nganyana	548213	7881745	548573	7879099	1	donkey	0	NA	Lion	N	N	NA
337	337	2010-10-19	2010-10-17	2010	Tsholotsho	Nganyana	548467	7881953	548619	7879131	1	donkey	0	NA	Lion	N	N	NA
338	338	2011-04-28	2010-10-18	2010	Tsholotsho	Dibutibu	571376	7890771	569624	7889721	2	cattle	0	NA	Hyaena	N	D	Y
339	339	2010-10-26	2010-10-24	2010	Tsholotsho	ziga	550109	7875637	549120	7877591	1	donkey	0	NA	Lion	N	N	NA
340	340	2010-11-11	2010-10-31	2010	Tsholotsho	gwabazabuya	499701	7851933	502000	7853950	1	cattle	1	cattle	Hyaena	N	N	N
341	341	2010-11-19	2010-10-31	2010	Tsholotsho	Manjelengwa	539807	7869076	539969	7869462	1	cattle	0	NA	Hyaena	N	N	N
342	342	2010-12-09	2010-10-31	2010	Tsholotsho	Manjelengwa	540737	7869572	538847	7869875	1	donkey	0	NA	Lion	N	N	Y
343	343	2011-04-28	2010-10-31	2010	Tsholotsho	Dibutibu	571366	7885235	568834	7884446	1	cattle	0	NA	Hyaena	N	N	Y
344	344	2010-11-16	2010-11-01	2010	Tsholotsho	manguta	534872	7852949	534519	7853103	1	goat	0	NA	Hyaena	N	N	N
345	345	2010-11-18	2010-11-01	2010	Tsholotsho	Mashula	540433	7860665	535500	7862500	0	NA	1	cattle	Hyaena	N	N	Y
346	346	2010-11-18	2010-11-01	2010	Tsholotsho	Mashula	540465	7860867	535500	7862500	0	NA	1	cattle	Hyaena	N	N	N
347	347	2010-12-07	2010-11-03	2010	Tsholotsho	Mlevu	546264	7869639	547007	7870415	1	donkey	0	NA	Lion	N	N	N
348	348	2010-12-07	2010-11-03	2010	Tsholotsho	Mlevu	546246	7868594	546996	7870493	1	donkey	0	NA	Lion	N	N	N
349	349	2010-12-07	2010-11-03	2010	Tsholotsho	Mlevu	546225	7869857	546118	7871788	2	cattle	0	NA	Lion	N	D	N
350	350	2010-12-07	2010-11-03	2010	Tsholotsho	Mlevu	546058	7869612	546251	7871856	2	donkey	0	NA	Lion	N	D	N
351	351	2010-12-16	2010-11-04	2010	Mabale	Chimwaravillage4	533086	7932538	533677	7936485	3	cattle	0	NA	Lion	N	N	NA
352	352	2010-12-07	2010-11-05	2010	Tsholotsho	Mlevu	547234	7869902	549450	7871500	1	cattle	0	NA	Lion	N	D	N
353	353	2010-11-11	2010-11-07	2010	Tsholotsho	gwabazabuya	499644	7851972	495200	7853100	1	cattle	0	NA	Hyaena	N	N	N
354	354	2011-04-08	2010-11-11	2010	Tsholotsho	Manjelengwa	539196	7869041	535500	7862500	1	donkey	0	NA	Lion	N	N	N
355	355	2010-11-16	2010-11-13	2010	Tsholotsho	Manguta	534303	7853241	534316	7853213	1	goat	0	NA	Hyaena	N	N	N
356	356	2010-12-16	2010-11-15	2010	Mabale	Chimwaravillage4	533107	7932073	534210	7931920	1	donkey	0	NA	Lion	N	N	NA
357	357	2010-12-16	2010-11-15	2010	Mabale	Chimwaravillage5	534711	7933057	534723	7933063	1	cattle	0	NA	Lion	Y	N	NA
358	358	2010-12-16	2010-11-15	2010	Mabale	Chimwaravillage4	533015	7932265	532805	7935956	1	cattle	0	NA	Lion	N	N	NA
359	359	2010-11-16	2010-11-15	2010	Tsholotsho	Mangutana	536504	7855948	535373	7856342	1	donkey	0	NA	Hyaena	N	N	N
360	360	2011-04-08	2010-11-15	2010	Tsholotsho	janiza	545976	7866703	545819	7866947	1	goat	0	NA	Hyaena	N	N	Y
361	361	2011-04-28	2010-11-15	2010	Tsholotsho	Dibutibu	570480	7885299	569920	7885402	0	NA	3	donkey	Hyaena	N	N	N
362	362	2011-04-28	2010-11-15	2010	Tsholotsho	Dibutibu	572341	7889991	568071	7887693	1	cattle	0	NA	Hyaena	N	N	N
363	363	2011-04-29	2010-11-15	2010	Tsholotsho	Dibutibu	572341	7889991	572358	7889907	2	donkey	0	NA	Hyaena	Y	N	Y
364	364	2011-04-29	2010-11-15	2010	Tsholotsho	Dibutibu	570899	7890359	570091	7890361	1	donkey	0	NA	Hyaena	Y	N	Y
365	365	2011-04-29	2010-11-15	2010	Tsholotsho	Dibutibu	570899	7890359	570877	7890400	1	donkey	0	NA	Hyaena	N	N	Y
366	366	2011-03-08	2010-11-15	2010	Mabale	Gundwane	542164	7928679	542967	7935693	1	cattle	0	NA	Lion	N	N	NA
367	367	2011-07-28	2010-11-15	2010	Tsholotsho	sodaka	509393	7855290	512319	7855839	1	cattle	2	cattle	Hyaena	N	N	NA
368	368	2010-12-10	2010-11-21	2010	Tsholotsho	Mangutana	536480	7855977	536975	7857060	2	cattle	0	NA	Hyaena	N	N	Y
369	369	2010-12-14	2010-11-22	2010	Mabale	Lupote	497016	7951614	497020	7950961	1	donkey	0	NA	Hyaena	N	N	NA
370	370	2010-02-20	2010-11-25	2010	Mabale	Gundwane	541465	7929624	541531	7929678	1	donkey	0	NA	Hyaena	N	N	NA
371	371	2010-12-16	2010-11-25	2010	Mabale	Chimwaravillage5	535257	7933083	532943	7932949	2	donkey	0	NA	Lion	N	N	NA
372	372	2012-01-20	2010-11-25	2010	Mabale	Mazwa	531070	7939133	532070	7938743	1	cattle	1	cattle	Lion	N	N	NA
373	373	2010-12-14	2010-11-27	2010	Mabale	Magoli	488155	7948586	490092	7945327	2	cattle	0	NA	Lion	N	D	NA
374	374	2010-12-30	2010-11-27	2010	Mabale	Magoli	487941	7949584	492067	7946295	2	cattle	0	NA	Lion	N	D	NA
375	375	2010-12-07	2010-11-28	2010	Tsholotsho	Mlevu	548158	7870302	547200	7873118	1	cattle	1	cattle	Lion	N	D	Y
376	376	2010-12-09	2010-11-28	2010	Tsholotsho	Ndodana	525865	7864521	526310	7863928	1	donkey	0	NA	Hyaena	N	N	Y
377	377	2010-12-07	2010-11-30	2010	Tsholotsho	Mlevu	545603	7879662	542960	7872595	1	cattle	0	NA	Lion	N	D	N
378	378	2010-12-08	2010-11-30	2010	Tsholotsho	Mhlabeni	538053	7872568	538888	7872978	1	cattle	0	NA	Lion	N	N	N
379	379	2010-12-09	2010-11-30	2010	Tsholotsho	Ndodana	525865	7864521	527133	7860911	1	cattle	0	NA	Hyaena	N	N	Y
380	380	2011-04-08	2010-11-30	2010	Tsholotsho	ziga	549590	7875737	548551	7875928	1	cattle	0	NA	Lion	N	N	N
381	381	2011-04-09	2010-11-30	2010	Tsholotsho	Fambatshena	560810	7874917	560331	7875068	0	NA	1	cattle	Hyaena	N	N	Y
382	382	2011-06-22	2010-12-01	2010	Mabale	Mambanje	477821	7850521	477858	7950493	1	goat	0	NA	Hyaena	N	N	NA
383	383	2010-12-16	2010-12-02	2010	Mabale	Chimwaravillage4	533080	7932736	533428	7933098	0	NA	1	cattle	Lion	N	D	NA
384	384	2010-12-09	2010-12-04	2010	Tsholotsho	makeni	522958	7858023	518187	7861277	1	cattle	2	cattle	Hyaena	N	N	Y
385	385	2010-12-09	2010-12-04	2010	Tsholotsho	Ndodana	525195	7864311	526059	7865160	1	cattle	0	NA	Hyaena	N	N	N
386	386	2010-12-09	2010-12-04	2010	Tsholotsho	Vulashaba	534292	7869519	534449	7868922	2	goat	0	NA	Lion	N	N	N
387	387	2010-12-09	2010-12-06	2010	Tsholotsho	gwenga	543802	7870127	543882	7870405	3	donkey	0	NA	Lion	N	N	Y
388	388	2011-04-08	2010-12-11	2010	Tsholotsho	ziga	550105	7875617	548554	7875726	1	cattle	0	NA	Lion	N	N	N
389	389	2011-04-07	2010-12-12	2010	Tsholotsho	ziga	540105	7875617	549476	7875213	0	NA	1	cattle	Lion	N	D	Y
390	390	2011-04-07	2010-12-15	2010	Tsholotsho	Manjelengwa	539748	7869473	539791	7869630	2	donkey	0	NA	Lion	N	N	N
391	391	2011-04-08	2010-12-15	2010	Tsholotsho	janiza	545267	7866299	545272	7866327	1	donkey	0	NA	Hyaena	N	N	N
392	392	2011-04-08	2010-12-15	2010	Tsholotsho	Xhabamude	543172	7865983	543615	7866593	1	donkey	0	NA	Hyaena	N	N	Y
393	393	2011-04-28	2010-12-15	2010	Tsholotsho	Dibutibu	570802	7885495	570831	7885441	0	NA	2	donkey	Hyaena	Y	N	N
394	394	2011-04-29	2010-12-15	2010	Tsholotsho	Dibutibu	571961	7891342	569087	7892140	4	goat	0	NA	Lion	N	D	N
395	395	2011-03-08	2010-12-15	2010	Mabale	Gundwane	541687	7928541	543486	7926895	1	donkey	0	NA	Lion	N	N	NA
396	396	2011-06-01	2010-12-15	2010	Tsholotsho	kapanyana	555794	7865569	556097	7865742	1	donkey	1	donkey	Hyaena	N	N	Y
397	397	2011-03-08	2010-12-19	2010	Mabale	Halfway	539027	7928950	539324	7929057	1	cattle	0	NA	Lion	N	N	NA
398	398	2011-04-06	2010-12-26	2010	Tsholotsho	Ngamo	549687	7879560	551477	7881033	1	cattle	0	NA	Hyaena	N	N	Y
399	399	2011-04-29	2010-12-30	2010	Tsholotsho	Dibutibu	570899	7890359	570900	7894000	1	cattle	0	NA	Lion	N	N	N
400	400	2011-04-08	2010-12-31	2010	Tsholotsho	Mashula	539620	7861740	539683	7867093	0	NA	2	cattle	Hyaena	N	D	Y
401	401	2011-04-08	2010-12-31	2010	Tsholotsho	ziga	549413	7875424	549408	7875427	1	donkey	0	NA	Lion	Y	N	Y
402	402	2011-04-07	2011-01-01	2011	Tsholotsho	makeni	522735	7857267	522681	7857283	1	cattle	0	NA	Hyaena	N	N	N
403	403	2011-01-03	2011-01-01	2011	Mabale	Chimwaravillage3	534270	7929730	534284	7929772	1	cattle	0	NA	Lion	Y	N	NA
404	404	2011-01-03	2011-01-01	2011	Mabale	Chimwaravillage3	534108	7929785	534092	7929785	1	cattle	0	NA	Lion	Y	N	NA
405	405	2011-01-07	2011-01-01	2011	Mabale	Chimwaravillage5	535895	7932541	535902	7932500	1	donkey	1	donkey	Lion	Y	N	NA
406	406	2011-02-17	2011-01-01	2011	Mabale	Magoli	488329	7946324	488397	7946237	1	cattle	0	NA	Lion	Y	N	NA
407	407	2011-06-22	2011-01-01	2011	Mabale	Mambanje	477821	7950521	477858	7950493	2	goat	1	cattle	Leopard	Y	N	NA
408	408	2011-06-22	2011-01-01	2011	Mabale	Mambanje	477821	7950521	477858	7950493	2	cattle	0	NA	Leopard	Y	N	NA
409	409	2011-06-22	2011-01-01	2011	Mabale	Mambanje	477821	7950521	477858	7950493	2	goat	0	NA	Leopard	Y	N	NA
410	410	2011-06-22	2011-01-01	2011	Mabale	Mambanje	477821	7950521	477858	7950493	2	cattle	0	NA	Leopard	Y	N	NA
411	411	2011-04-07	2011-01-01	2011	Tsholotsho	Vulashaba	533920	7869768	533604	7868494	1	donkey	0	NA	Lion	N	N	N
412	412	2011-04-07	2011-01-01	2011	Tsholotsho	Vulashaba	533920	7869768	533606	7868606	1	donkey	0	NA	Lion	N	N	N
413	413	2011-04-07	2011-01-01	2011	Tsholotsho	Vulashaba	533920	7869768	533851	7869693	1	donkey	0	NA	Lion	N	N	N
414	414	2011-04-08	2011-01-01	2011	Tsholotsho	Bonke	539787	7864281	539805	7864404	1	donkey	0	NA	Hyaena	N	N	Y
415	415	2011-04-08	2011-01-01	2011	Tsholotsho	janiza	545976	7866703	545947	7866591	5	goat	0	NA	Hyaena	N	N	N
416	416	2011-04-08	2011-01-01	2011	Tsholotsho	janiza	546056	7866728	545620	7866639	1	donkey	0	NA	Hyaena	N	N	Y
417	417	2011-04-27	2011-01-01	2011	Tsholotsho	sihazela	520447	7854353	519971	7858305	1	cattle	0	NA	Hyaena	N	N	Y
418	418	2011-06-02	2011-01-01	2011	Tsholotsho	Hobho	572716	7894503	573385	7896886	3	cattle	0	NA	Lion	N	D	Y
419	419	2012-03-25	2011-01-05	2011	Tsholotsho	Dibutibu	568331	7855977	568055	7857885	2	cattle	0	NA	Hyaena	N	N	N
420	420	2011-04-07	2011-01-07	2011	Tsholotsho	Ndodana	526155	7864560	526152	7864552	1	donkey	0	NA	Hyaena	N	D	N
421	421	2011-04-09	2011-01-09	2011	Tsholotsho	Siwela	553388	7878103	552471	7878654	1	cattle	0	NA	Hyaena	N	N	Y
422	422	2011-01-17	2011-01-12	2011	Mabale	Dopota	501919	7948246	501895	7948322	1	cattle	0	NA	Lion	Y	N	NA
423	423	2011-02-18	2011-01-15	2011	Mabale	Chimwaravillage2	536650	7930809	539422	7930648	1	cattle	0	NA	Lion	N	D	NA
424	424	2011-02-18	2011-01-15	2011	Mabale	Chimwaravillage2	536703	7930598	539537	7931071	1	cattle	0	NA	Lion	N	D	NA
425	425	2011-02-19	2011-01-15	2011	Mabale	Gundwane	542435	7928895	542449	7928864	1	sheep	0	NA	Hyaena	Y	N	NA
426	426	2011-03-08	2011-01-15	2011	Mabale	Gundwane	542668	7929561	558186	7923924	0	NA	1	donkey	Lion	N	N	NA
427	427	2011-04-07	2011-01-15	2011	Tsholotsho	makeni	522863	7857589	522817	7857854	1	cattle	0	NA	Hyaena	N	N	Y
428	428	2011-04-07	2011-01-15	2011	Tsholotsho	Nkoba	528775	7864652	542447	7859766	1	cattle	0	NA	Hyaena	N	D	Y
429	429	2011-04-07	2011-01-15	2011	Tsholotsho	Ndodana	524570	7863918	524562	7863924	1	goat	0	NA	Lion	Y	N	Y
430	430	2011-04-29	2011-01-15	2011	Tsholotsho	Dibutibu	570828	7890490	567821	7890603	2	cattle	0	NA	Lion	N	N	Y
431	431	2011-06-02	2011-01-15	2011	Tsholotsho	Hobho	570894	7892899	564941	7895628	1	cattle	0	NA	Lion	N	D	Y
432	432	2011-06-02	2011-01-15	2011	Tsholotsho	Hobho	572230	7891792	567277	7898143	2	cattle	0	NA	Lion	N	D	Y
433	433	2011-03-08	2011-01-20	2011	Mabale	Halfway	539027	7928950	539324	7929057	3	cattle	0	NA	Lion	Y	N	NA
434	434	2011-04-09	2011-01-23	2011	Tsholotsho	Siwela	553693	7877852	553622	7879083	1	cattle	0	NA	Hyaena	N	N	N
435	435	2011-04-09	2011-01-23	2011	Tsholotsho	Siwela	553693	7877852	553537	7879191	1	cattle	0	NA	Hyaena	N	N	N
436	436	2012-01-20	2011-01-25	2011	Mabale	Mazwa	531070	7939138	531082	7939150	2	cattle	0	NA	Lion	Y	N	NA
437	437	2011-12-09	2011-01-25	2011	Mabale	Hankano	526766	7945629	526719	7945622	10	goat	4	goat	Lion	Y	N	NA
438	438	2011-04-28	2011-01-27	2011	Tsholotsho	Dibutibu	570953	7890433	569750	7890934	1	goat	2	goat	Hyaena	Y	N	N
439	439	2011-04-08	2011-01-31	2011	Tsholotsho	Nkoba	528775	7864652	528249	7864298	1	donkey	0	NA	Lion	N	N	N
440	440	2011-04-28	2011-02-05	2011	Tsholotsho	Dibutibu	570953	7890433	570775	7888432	5	donkey	0	NA	Hyaena	N	N	Y
441	441	2011-04-06	2011-02-07	2011	Tsholotsho	Nganyana	548612	7882262	547531	7885499	1	cattle	0	NA	Lion	N	D	N
442	442	2011-04-06	2011-02-07	2011	Tsholotsho	Nganyana	548561	7881786	547562	7885536	1	cattle	0	NA	Lion	N	D	Y
443	443	2011-04-06	2011-02-08	2011	Tsholotsho	Nganyana	549587	7882731	547849	7885166	1	cattle	0	NA	Lion	N	N	N
444	444	2011-04-06	2011-02-08	2011	Tsholotsho	Nganyana	549631	7882821	547909	7885239	2	cattle	0	NA	Lion	N	D	N
445	445	2011-04-09	2011-02-10	2011	Tsholotsho	Siwela	553746	7877902	551583	7878390	1	cattle	0	NA	Hyaena	N	N	Y
446	446	2011-04-27	2011-02-14	2011	Tsholotsho	vusani	532908	7851399	532255	7852663	0	NA	2	cattle	Hyaena	N	N	Y
447	447	2011-02-18	2011-02-15	2011	Mabale	Chimwaravillage2	536540	7930452	536670	7930599	1	cattle	0	NA	Leopard	N	D	NA
448	448	2011-04-06	2011-02-15	2011	Tsholotsho	Ngamo	548400	7887254	548328	7887148	2	cattle	0	NA	Lion	N	D	Y
449	449	2011-04-07	2011-02-15	2011	Tsholotsho	Vulashaba	536277	7869537	534578	7869789	0	NA	1	cattle	Lion	N	D	N
450	450	2011-04-28	2011-02-15	2011	Tsholotsho	Dibutibu	567968	7887424	566873	7886481	1	donkey	0	NA	Hyaena	N	N	N
451	451	2011-04-29	2011-02-15	2011	Tsholotsho	Dibutibu	570639	7890330	569087	7890452	1	cattle	0	NA	Hyaena	N	D	Y
452	452	2011-02-24	2011-02-16	2011	Mabale	Makwandara	483276	7954559	477104	7951464	1	goat	1	cattle	Lion	N	D	NA
453	453	2011-03-08	2011-02-19	2011	Mabale	Halfway	539027	7929895	539324	7929057	1	cattle	0	NA	Lion	Y	N	NA
454	454	2011-04-06	2011-02-24	2011	Tsholotsho	Ngamo	550690	7844160	548932	7885742	1	donkey	0	NA	Lion	N	N	Y
455	455	2011-03-08	2011-02-25	2011	Mabale	Gundwane	541948	7928734	540638	7928196	1	donkey	0	NA	Leopard	N	N	NA
456	456	2011-03-08	2011-02-25	2011	Mabale	Halfway	539027	7928950	539324	7929057	1	cattle	0	NA	Lion	N	N	NA
457	457	2011-03-10	2011-02-26	2011	Mabale	Chezhou	482480	7947348	482021	7944143	1	cattle	0	NA	Lion	N	N	NA
458	458	2011-03-10	2011-02-26	2011	Mabale	Chezhou	482087	7947570	482123	7947595	3	goat	0	NA	Lion	Y	N	NA
459	459	2011-06-02	2011-02-27	2011	Tsholotsho	Hobho	572716	7894503	574822	7892394	1	cattle	0	NA	Lion	N	D	N
460	460	2011-03-10	2011-02-28	2011	Mabale	Chezhou	482273	7947390	481994	7944055	1	cattle	0	NA	Lion	N	D	NA
461	461	2011-04-06	2011-02-28	2011	Tsholotsho	Nganyana	547776	7881062	547929	7881097	3	cattle	0	NA	Lion	N	D	Y
462	462	2011-06-20	2011-03-01	2011	Mabale	Mambanje	477955	7950842	477955	7950842	1	sheep	0	NA	Leopard	Y	N	NA
463	463	2011-06-22	2011-03-01	2011	Mabale	Mambanje	477524	7950319	477516	7950305	1	goat	0	NA	Hyaena	Y	N	NA
464	464	2011-04-08	2011-03-01	2011	Tsholotsho	makeni	522959	7858021	522995	7858133	1	cattle	0	NA	Hyaena	N	N	N
465	465	2011-04-08	2011-03-01	2011	Tsholotsho	makeni	522986	7857603	523093	7858450	1	donkey	0	NA	Hyaena	N	N	N
466	466	2011-04-08	2011-03-01	2011	Tsholotsho	janiza	545976	7866703	546017	7866544	1	goat	0	NA	Hyaena	N	N	N
467	467	2011-04-27	2011-03-01	2011	Tsholotsho	sihazela	520533	7854312	524658	7856841	1	cattle	0	NA	Hyaena	N	N	Y
468	468	2011-04-28	2011-03-01	2011	Tsholotsho	Dibutibu	573539	7888473	571583	7886179	4	cattle	0	NA	Lion	N	N	Y
469	469	2011-04-28	2011-03-01	2011	Tsholotsho	Dibutibu	569586	7885970	568343	7886292	1	cattle	1	cattle	Hyaena	N	N	Y
470	470	2011-04-28	2011-03-01	2011	Tsholotsho	Dibutibu	569613	7883795	564160	7890512	3	cattle	1	cattle	Lion	N	D	Y
471	471	2011-06-01	2011-03-01	2011	Tsholotsho	Kapanyana	556764	7860763	559192	7862930	1	cattle	0	NA	Hyaena	N	N	Y
472	472	2011-06-02	2011-03-01	2011	Tsholotsho	Hobho	572716	7894503	572879	7894493	1	cattle	0	NA	Lion	N	D	Y
473	473	2011-06-02	2011-03-01	2011	Tsholotsho	Hobho	572486	7894656	572482	7894654	1	donkey	0	NA	Hyaena	N	N	N
474	474	2011-06-22	2011-03-01	2011	Mabale	Mambanje	477524	7950319	477516	7950305	1	goat	0	NA	Hyaena	Y	N	NA
475	475	2011-07-26	2011-03-01	2011	Tsholotsho	Dibutibu	571523	7885465	570928	7884815	1	donkey	0	NA	Hyaena	N	N	N
476	476	2011-03-10	2011-03-03	2011	Mabale	Chezhou	482480	7947348	482443	7947358	1	goat	0	NA	Lion	Y	N	NA
477	477	2011-04-07	2011-03-04	2011	Tsholotsho	Mtshayeli	534804	7865084	522939	7858329	1	donkey	0	NA	Hyaena	N	N	N
478	478	2011-03-10	2011-03-08	2011	Mabale	Makwandara	479725	7953059	479835	7953079	1	cattle	1	cattle	Lion	Y	N	NA
479	479	2011-03-10	2011-03-08	2011	Mabale	Makwandara	479902	7953226	479899	7953215	1	goat	0	NA	Lion	Y	N	NA
480	480	2011-04-07	2011-03-15	2011	Tsholotsho	mlevu	545913	7869015	545746	7868817	1	cattle	0	NA	Lion	N	D	N
481	481	2011-04-07	2011-03-15	2011	Tsholotsho	gwenga	543057	7870332	543076	7871002	0	NA	1	cattle	Lion	N	D	Y
482	482	2011-04-08	2011-03-15	2011	Tsholotsho	manguta	534680	7853104	534858	7853253	1	cattle	2	cattle	Hyaena	N	N	Y
483	483	2011-04-08	2011-03-15	2011	Tsholotsho	makeni	522863	7857259	522684	7857873	1	cattle	0	NA	Hyaena	N	N	Y
484	484	2011-04-08	2011-03-15	2011	Tsholotsho	ziga	550105	7875617	548658	7873880	1	cattle	0	NA	Lion	N	N	N
485	485	2011-04-09	2011-03-15	2011	Tsholotsho	janiza	546342	7866842	546136	7866544	1	cattle	0	NA	Hyaena	N	N	N
486	486	2011-04-28	2011-03-15	2011	Tsholotsho	Dibutibu	570486	7885299	570450	7885312	5	goat	0	NA	Hyaena	Y	N	N
487	487	2011-04-28	2011-03-15	2011	Tsholotsho	Dibutibu	570350	7885278	574371	7889834	1	cattle	0	NA	Hyaena	N	N	N
488	488	2011-06-02	2011-03-15	2011	Tsholotsho	Hobho	571227	7892701	571053	7892508	3	cattle	0	NA	Hyaena	N	N	N
489	489	2011-06-03	2011-03-15	2011	Tsholotsho	Elangeni	503101	7846797	503835	7847058	2	goat	0	NA	Caracal	N	D	N
490	490	2011-07-27	2011-03-15	2011	Tsholotsho	Vozheka	554628	7883818	548791	7885750	2	cattle	0	NA	Lion	N	N	NA
491	491	2012-02-01	2011-03-25	2011	Mabale	Chimwaravillage5	535876	7932515	535897	7932504	2	donkey	0	NA	Lion	Y	N	NA
492	492	2012-01-20	2011-03-25	2011	Mabale	Mazwa	529163	7939375	529170	7939364	6	goat	0	NA	Lion	Y	N	NA
493	493	2011-04-28	2011-03-29	2011	Tsholotsho	Dibutibu	570189	7883619	568071	7887693	1	cattle	0	NA	Hyaena	N	N	N
494	494	2011-04-27	2011-03-30	2011	Tsholotsho	Bemba	529192	7848917	530142	7850754	1	cattle	0	NA	Hyaena	N	N	Y
495	495	2011-04-27	2011-03-30	2011	Tsholotsho	Bemba	529254	7848751	529312	7850837	0	NA	1	cattle	Hyaena	N	N	N
496	496	2011-04-08	2011-03-31	2011	Tsholotsho	bemba	529008	7849370	528508	7850123	0	NA	2	cattle	Hyaena	N	N	Y
497	497	2011-04-08	2011-03-31	2011	Tsholotsho	makeni	522852	7857802	522897	7857248	1	cattle	0	NA	Hyaena	N	N	Y
498	498	2011-06-22	2011-04-01	2011	Mabale	Mambanje	477821	7950521	477013	7949267	1	cattle	0	NA	Lion	N	D	NA
499	499	2011-06-22	2011-04-01	2011	Mabale	Mambanje	477821	7950521	477013	7949267	1	cattle	0	NA	Lion	N	D	NA
500	500	2011-04-08	2011-04-01	2011	Tsholotsho	Mashula	539454	7862265	539255	7862459	1	donkey	0	NA	Hyaena	N	N	N
501	501	2011-04-28	2011-04-01	2011	Tsholotsho	Dibutibu	569586	7885970	565637	7887065	1	cattle	1	cattle	Hyaena	N	N	Y
502	502	2011-06-22	2011-04-01	2011	Mabale	Mambanje	477524	7950319	477281	7949881	0	NA	1	goat	Lion	N	D	NA
503	503	2011-07-26	2011-04-01	2011	Tsholotsho	Dibutibu	571523	7885465	571512	7885469	1	goat	0	NA	Hyaena	Y	N	NA
504	504	2011-07-28	2011-04-01	2011	Tsholotsho	sodaka	509989	7855026	511064	7856816	1	cattle	1	cattle	Hyaena	N	N	NA
506	506	2012-01-20	2011-04-05	2011	Mabale	Mazwa	529163	7939375	529042	7939418	2	goat	0	NA	Lion	N	N	NA
507	507	2011-06-20	2011-04-06	2011	Mabale	Mambanje	477955	7950842	477412	7950589	3	goat	0	NA	Lion	N	D	NA
508	508	2011-04-12	2011-04-07	2011	Mabale	Gundwane	541463	7928447	541228	7926708	0	NA	1	cattle	Lion	N	D	NA
509	509	2011-04-12	2011-04-07	2011	Mabale	Gundwane	541762	7929543	542368	7929360	6	sheep	0	NA	Lion	Y	N	NA
510	510	2011-04-06	2011-04-08	2011	Tsholotsho	Ngamo	550478	7885253	550466	7888006	1	cattle	1	cattle	Lion	N	D	Y
511	511	2011-04-09	2011-04-08	2011	Tsholotsho	Vozheka	0	0	548900	7885916	1	cattle	0	NA	Lion	N	N	NA
512	512	2011-04-09	2011-04-08	2011	Tsholotsho	Vozheka	0	0	548872	7885955	1	cattle	0	NA	Lion	N	N	NA
513	513	2011-04-28	2011-04-15	2011	Tsholotsho	Dibutibu	571178	7884522	571884	7887347	1	cattle	0	NA	Hyaena	N	N	Y
514	514	2011-04-27	2011-04-19	2011	Tsholotsho	Manguta	534282	7853250	534486	7854682	1	cattle	0	NA	Hyaena	N	N	Y
515	515	2011-04-28	2011-04-19	2011	Tsholotsho	Dibutibu	571366	7885235	571884	7886179	1	cattle	0	NA	Hyaena	N	N	Y
516	516	2011-04-27	2011-04-20	2011	Tsholotsho	Manguta	534839	7852944	534181	7854793	1	cattle	0	NA	Hyaena	N	N	Y
517	517	2011-04-27	2011-04-24	2011	Tsholotsho	vusani	532908	7851399	532646	7851600	1	donkey	0	NA	Hyaena	N	N	Y
518	518	2011-04-27	2011-04-24	2011	Tsholotsho	Mlevu	546369	7869781	544834	7874311	2	cattle	0	NA	Lion	N	D	Y
519	519	2011-04-27	2011-04-24	2011	Tsholotsho	Mlevu	546201	7878552	544834	7874311	2	cattle	0	NA	Lion	N	D	N
520	520	2011-06-01	2011-05-01	2011	Tsholotsho	Dibutibu	570627	7890341	567277	7890418	1	cattle	3	cattle	Hyaena	N	N	Y
521	521	2011-06-15	2011-05-01	2011	Mabale	Gezi	499888	7954582	506380	7959235	3	cattle	0	NA	Lion	N	N	NA
522	522	2011-06-22	2011-05-01	2011	Mabale	Mambanje	477984	7950607	477552	7950195	1	goat	1	goat	Lion	N	D	NA
523	523	2011-06-03	2011-05-01	2011	Tsholotsho	sihazela	520450	7854361	521031	7854751	1	donkey	0	NA	Hyaena	N	N	N
524	524	2011-06-01	2011-05-15	2011	Tsholotsho	Kapanyana	556732	7864477	555698	7865445	1	cattle	0	NA	Hyaena	N	N	N
525	525	2011-06-04	2011-05-15	2011	Tsholotsho	Mangutana	536441	7855738	536236	7856288	1	donkey	1	donkey	Hyaena	N	N	Y
526	526	2011-06-20	2011-05-15	2011	Mabale	Mambanje	477955	7950842	477352	7950320	2	goat	0	NA	Leopard	N	D	NA
527	527	2011-06-22	2011-05-15	2011	Mabale	Mambanje	477984	7950607	477552	7950195	1	goat	0	NA	Lion	N	D	NA
528	528	2011-06-04	2011-05-15	2011	Tsholotsho	Mashula	539606	7861750	537097	7860779	1	cattle	0	NA	Hyaena	N	N	N
529	529	2011-07-27	2011-05-15	2011	Tsholotsho	Vozheka	554672	7883994	548792	7885749	1	cattle	0	NA	Lion	N	N	NA
530	530	2012-01-20	2011-05-15	2011	Mabale	Mazwa	529040	7939408	529043	7939418	6	goat	0	NA	Lion	Y	N	NA
531	531	2011-07-28	2011-05-15	2011	Tsholotsho	sodaka	509379	7856253	509320	7852700	1	cattle	0	NA	Hyaena	N	N	Y
532	532	2012-01-11	2011-05-25	2011	Tsholotsho	Manguta	535563	7852761	537938	7853289	1	cattle	2	cattle	Hyaena	N	N	N
533	533	2011-06-01	2011-05-27	2011	Tsholotsho	Mlevu	546313	7869683	545959	7869803	1	donkey	0	NA	Lion	N	N	N
534	534	2011-06-01	2011-05-27	2011	Tsholotsho	Mlevu	546158	7868981	545933	7869814	2	donkey	0	NA	Lion	N	N	N
535	535	2011-06-01	2011-05-27	2011	Tsholotsho	Mlevu	546182	7868886	545935	7869814	1	donkey	1	donkey	Lion	N	N	N
536	536	2012-04-24	2011-05-28	2011	Tsholotsho	Mvana	557730	7875746	558170	7875564	1	cattle	0	NA	Hyaena	N	N	NA
537	537	2011-06-01	2011-05-30	2011	Tsholotsho	Kapanyana	556764	7860763	557216	7861493	1	cattle	0	NA	Hyaena	N	N	N
538	538	2011-06-03	2011-05-30	2011	Tsholotsho	Nsingweni	512853	7854673	512335	7854451	1	donkey	0	NA	Hyaena	N	N	Y
539	539	2011-06-04	2011-05-30	2011	Tsholotsho	Mashula	539724	7861885	537391	7857909	1	donkey	0	NA	Hyaena	N	N	N
540	540	2011-06-04	2011-05-30	2011	Tsholotsho	Mashula	539967	7861459	537906	7859749	1	donkey	0	NA	Hyaena	N	N	Y
541	541	2011-06-01	2011-06-01	2011	Tsholotsho	Kapanyana	556745	7861231	556167	7862519	1	donkey	0	NA	Hyaena	N	N	N
542	542	2011-06-04	2011-06-02	2011	Tsholotsho	Mangutana	536499	7855969	535874	7855914	1	donkey	1	donkey	Hyaena	N	N	Y
543	543	2011-06-15	2011-06-05	2011	Mabale	Songwa	493294	7965643	494803	7971414	1	cattle	0	NA	Lion	Y	N	NA
544	544	2012-03-24	2011-06-05	2011	Tsholotsho	Mvana	557730	7875746	554394	7870511	1	cattle	0	NA	Hyaena	N	N	NA
545	545	2011-06-15	2011-06-09	2011	Mabale	Kamalala	492120	7967624	493653	7965073	2	cattle	0	NA	Lion	N	D	NA
546	546	2011-06-15	2011-06-09	2011	Mabale	Kamalala	492120	7967624	492084	7967614	4	goat	0	NA	Lion	Y	N	NA
547	547	2011-07-27	2011-06-15	2011	Tsholotsho	Vozheka	554407	7883918	554592	7884230	2	cattle	0	NA	Lion	N	N	NA
548	548	2011-07-28	2011-06-15	2011	Tsholotsho	makeni	522973	7858231	525503	7859605	1	cattle	0	NA	Hyaena	N	N	NA
549	549	2011-07-28	2011-06-15	2011	Tsholotsho	makeni	522859	7857261	525224	7857792	1	cattle	1	cattle	Hyaena	N	N	N
550	550	2011-07-28	2011-06-15	2011	Tsholotsho	sodaka	509393	7855290	509599	7855700	1	cattle	0	NA	Hyaena	N	N	NA
551	551	2012-05-04	2011-06-15	2011	Tsholotsho	gwabazabuya	500369	7852760	499793	7851731	0	NA	1	cattle	Lion	N	N	NA
552	552	2012-01-11	2011-06-15	2011	Tsholotsho	Vusani	532584	7851223	532444	7851622	1	donkey	0	NA	Hyaena	N	N	N
553	553	2012-01-20	2011-06-25	2011	Mabale	Mazwa	529304	7939174	529295	7939140	1	goat	1	goat	Lion	Y	N	NA
554	554	2012-03-25	2011-06-25	2011	Tsholotsho	Hobho	572094	7892917	572090	7892918	1	goat	0	NA	Hyaena	Y	N	NA
555	555	2011-07-28	2011-06-30	2011	Tsholotsho	bonke	515984	7847845	516269	7847842	1	donkey	0	NA	Hyaena	N	N	NA
556	556	2011-07-26	2011-07-01	2011	Tsholotsho	Dibutibu	570865	7884812	570928	7884815	1	goat	0	NA	Hyaena	Y	N	NA
557	557	2011-07-26	2011-07-01	2011	Tsholotsho	Dibutibu	570865	7884812	574124	7885556	1	donkey	0	NA	Hyaena	N	N	NA
558	558	2011-07-27	2011-07-01	2011	Tsholotsho	Ngamo	550674	7884408	547606	7885746	1	cattle	0	NA	Lion	N	N	NA
559	559	2011-07-27	2011-07-01	2011	Tsholotsho	stambaraold	553623	7881051	548057	7885691	2	cattle	0	NA	Lion	N	N	NA
560	560	2012-03-24	2011-07-05	2011	Tsholotsho	Dibutibu	572094	7892917	572121	7892945	0	NA	1	goat	Hyaena	N	N	NA
561	561	2012-03-25	2011-07-05	2011	Tsholotsho	Hobho	572094	7892917	572121	7892945	1	goat	0	NA	Hyaena	N	N	NA
562	562	2012-03-09	2011-07-15	2011	Mabale	Mazwa	530165	7939219	524634	7939495	2	donkey	0	NA	Lion	N	D	NA
563	563	2012-03-09	2011-07-15	2011	Mabale	Mazwa	530165	7939219	530223	7939231	1	cattle	0	NA	Lion	Y	N	NA
564	564	2011-07-28	2011-07-15	2011	Tsholotsho	makeni	522964	7857608	524387	7856676	1	donkey	1	donkey	Hyaena	N	N	N
565	565	2011-07-28	2011-07-15	2011	Tsholotsho	Bemba	529124	7849132	527570	7848662	1	cattle	0	NA	Hyaena	N	N	NA
566	566	2011-07-28	2011-07-18	2011	Tsholotsho	makeni	522814	7857797	523969	7857932	0	NA	1	cattle	Hyaena	N	N	N
567	567	2011-07-27	2011-07-20	2011	Tsholotsho	Ngamo	550524	7884619	547710	7885559	1	cattle	0	NA	Lion	N	D	NA
568	568	2011-07-27	2011-07-25	2011	Tsholotsho	Vozheka	554672	7883994	554522	7884091	0	NA	1	cattle	Hyaena	N	N	NA
569	569	2011-07-27	2011-07-25	2011	Tsholotsho	Ngamo	551324	7885355	548942	7886044	1	cattle	0	NA	Lion	N	N	NA
570	570	2012-03-24	2011-07-25	2011	Tsholotsho	sodaka	508573	7855100	508819	7854565	1	donkey	0	NA	Hyaena	N	N	NA
571	571	NA	2011-07-25	2011	Tsholotsho	Ndodana	524760	7864250	524552	7864449	1	cattle	0	NA	Lion	Y	N	N
572	572	2011-07-27	2011-07-27	2011	Tsholotsho	zandile	549504	7878749	549484	7878742	1	cattle	2	cattle	Lion	Y	N	NA
573	573	2012-03-25	2011-08-02	2011	Tsholotsho	Dibutibu	570793	7885491	571977	7885897	1	cattle	0	NA	Hyaena	N	N	NA
574	574	2011-10-04	2011-08-03	2011	Tsholotsho	Mhlabathini	572181	7890887	572181	7890887	3	goat	0	NA	Hyaena	Y	N	NA
575	575	2012-01-20	2011-08-05	2011	Mabale	Mazwa	530312	7939074	529447	7938061	1	donkey	0	NA	Lion	N	D	NA
576	576	2012-03-24	2011-08-09	2011	Tsholotsho	matetshaneni	507382	7855129	509503	7855492	1	donkey	0	NA	Hyaena	N	N	NA
577	577	2012-02-01	2011-08-15	2011	Mabale	Chimwaravillage4	533076	7932241	530165	7930882	1	cattle	0	NA	Lion	N	D	Y
578	578	2012-03-24	2011-08-15	2011	Tsholotsho	Elangeni	507365	7848595	507641	7851836	1	cattle	0	NA	Hyaena	N	N	NA
579	579	2012-03-24	2011-08-15	2011	Tsholotsho	Siwela	553792	7877931	553674	7877994	1	goat	0	NA	Hyaena	N	N	NA
580	580	2012-01-20	2011-08-15	2011	Mabale	Mazwa	529040	7939408	528270	7940186	1	donkey	0	NA	Lion	N	N	NA
581	581	2012-03-25	2011-08-15	2011	Tsholotsho	Hobho	572643	7894550	572962	7894699	1	donkey	0	NA	Hyaena	N	N	NA
582	582	2012-03-25	2011-08-16	2011	Tsholotsho	Dibutibu	570951	7890440	569806	7889845	0	NA	2	cattle	Hyaena	N	N	NA
583	583	2012-03-24	2011-08-25	2011	Tsholotsho	bonke	516500	7846799	516010	7847357	1	donkey	0	NA	Hyaena	N	N	NA
584	584	2012-05-03	2011-08-25	2011	Tsholotsho	dzimidza	512996	7850187	512432	7849453	1	cattle	0	NA	Lion	N	D	NA
585	585	2012-10-06	2011-08-25	2011	Tsholotsho	emanaleni	506374	7855077	506470	7856927	1	cattle	0	NA	Hyaena	N	N	NA
586	586	2012-10-06	2011-08-25	2011	Tsholotsho	NA	506655	7854979	507985	7855698	1	donkey	0	NA	Hyaena	N	N	Y
587	587	2011-10-05	2011-09-02	2011	Tsholotsho	Ngamo	550483	7885155	550505	7885177	1	cattle	0	NA	Lion	Y	N	NA
588	588	2011-10-04	2011-09-13	2011	Tsholotsho	Mhlabathini	542181	7890887	572913	7891799	3	goat	0	NA	Hyaena	N	N	NA
589	589	2011-10-06	2011-09-13	2011	Tsholotsho	ziga	550097	7875889	548591	7877649	1	donkey	0	NA	Hyaena	N	N	NA
590	590	2012-02-01	2011-09-15	2011	Mabale	Chimwaravillage2	535854	7929777	536400	7928014	1	cattle	0	NA	Lion	N	N	N
591	591	2012-02-01	2011-09-15	2011	Mabale	Chimwaravillage2	535854	7929777	535669	7927774	1	cattle	0	NA	Lion	N	D	N
592	592	2012-02-01	2011-09-15	2011	Mabale	Chimwaravillage5	534914	7933024	534929	7933029	2	goat	0	NA	Lion	N	N	NA
593	593	2011-10-06	2011-09-15	2011	Tsholotsho	zandile	549710	7879310	549340	7879704	1	donkey	0	NA	Hyaena	N	N	NA
594	594	2011-10-04	2011-09-17	2011	Tsholotsho	Mhlabathini	569303	7867314	571240	7888936	1	cattle	0	NA	Hyaena	N	N	NA
595	595	2011-10-07	2011-09-17	2011	Tsholotsho	Mhlabathini	569303	7867314	571240	7888936	0	NA	1	cattle	Hyaena	N	D	NA
596	596	2011-10-04	2011-09-21	2011	Tsholotsho	Hobho	572293	7891776	571240	7888936	1	cattle	0	NA	Hyaena	N	N	NA
597	597	2011-10-05	2011-09-22	2011	Tsholotsho	Ngamo	550715	7884365	551696	7886699	1	cattle	0	NA	Lion	N	N	NA
598	598	2011-10-05	2011-09-22	2011	Tsholotsho	Mashula	540197	7861112	537702	7864376	1	cattle	0	NA	Hyaena	N	N	NA
599	599	2011-10-05	2011-09-27	2011	Tsholotsho	Mashula	539960	7861461	536601	7860066	1	donkey	0	NA	Hyaena	N	N	NA
600	600	2011-10-05	2011-10-01	2011	Tsholotsho	Ndodana	524567	7863922	571242	7888936	1	cattle	0	NA	Lion	N	N	NA
601	601	2011-10-05	2011-10-01	2011	Tsholotsho	makeni	523024	7857772	524122	7858308	1	donkey	0	NA	Hyaena	N	N	NA
602	602	2011-10-05	2011-10-01	2011	Tsholotsho	Mashula	539960	7861451	538343	7860180	1	donkey	0	NA	Hyaena	N	N	NA
603	603	2011-12-02	2011-10-01	2011	Tsholotsho	Dibutibu	571160	7892573	575564	7893371	2	cattle	1	cattle	Hyaena	N	N	NA
604	604	2011-10-05	2011-10-02	2011	Tsholotsho	sihazela	519943	7853940	518788	7858344	1	cattle	0	NA	Hyaena	N	N	NA
605	605	2011-12-03	2011-10-07	2011	Tsholotsho	Mashula	540516	7860992	540754	7853509	1	cattle	0	NA	Hyaena	N	N	NA
606	606	2011-12-03	2011-10-07	2011	Tsholotsho	Mashula	540516	7860992	540754	7853509	1	cattle	0	NA	Hyaena	N	N	N
607	607	2012-02-01	2011-10-11	2011	Mabale	Chimwaravillage3	533414	7930328	534482	7928598	1	cattle	0	NA	Lion	N	D	N
608	608	2011-10-19	2011-10-14	2011	Tsholotsho	Ngamo	0	0	547249	7884229	1	cattle	0	NA	Lion	N	D	NA
609	609	2011-10-19	2011-10-14	2011	Tsholotsho	Ngamo	0	0	547270	7884282	1	cattle	0	NA	Lion	N	D	NA
610	610	2011-10-19	2011-10-14	2011	Tsholotsho	Ngamo	0	0	547257	7884293	1	cattle	0	NA	Lion	N	D	NA
611	611	2011-10-19	2011-10-14	2011	Tsholotsho	Ngamo	0	0	547227	7884203	1	cattle	0	NA	Lion	N	D	NA
612	612	2011-10-27	2011-10-14	2011	Tsholotsho	Nganyana	548738	7882172	547314	7885325	1	cattle	0	NA	Lion	N	N	NA
613	613	2011-10-28	2011-10-14	2011	Tsholotsho	Nganyana	548971	7882055	546869	7883822	1	cattle	0	NA	Lion	N	N	NA
614	614	2011-10-27	2011-10-14	2011	Tsholotsho	nganyana	548735	7882172	547314	7885325	1	cattle	0	NA	Lion	N	N	N
615	615	2011-10-19	2011-10-14	2011	Tsholotsho	nganyana	0	0	547239	7884232	4	cattle	0	NA	Lion	N	D	N
616	616	2011-10-28	2011-10-14	2011	Tsholotsho	nganyana	548971	7882055	546869	7883822	1	cattle	0	NA	Lion	N	N	N
617	617	2011-10-27	2011-10-14	2011	Tsholotsho	nganyana	548738	7882172	547314	7885325	1	cattle	0	NA	Lion	N	N	N
618	618	2012-02-01	2011-10-15	2011	Mabale	Chimwaravillage5	534914	7933024	533111	7929390	1	donkey	0	NA	Lion	N	N	NA
619	619	2011-10-19	2011-10-15	2011	Tsholotsho	Nganyana	548738	7882172	546869	7883807	1	cattle	0	NA	Lion	N	N	NA
620	620	2011-10-28	2011-10-15	2011	Tsholotsho	Nganyana	548100	7882700	547314	7885325	1	cattle	0	NA	Lion	N	N	NA
621	621	2011-10-28	2011-10-15	2011	Tsholotsho	Nganyana	548122	7881361	548122	7881914	1	donkey	0	NA	Lion	N	N	NA
622	622	2012-01-11	2011-10-15	2011	Tsholotsho	Mangutana	536478	7855968	540474	7856878	2	cattle	0	NA	Hyaena	N	N	N
623	623	2012-01-11	2011-10-15	2011	Tsholotsho	manguta	534563	7853123	534772	7854063	0	NA	1	cattle	Hyaena	N	N	N
624	624	2012-01-11	2011-10-15	2011	Tsholotsho	Manguta	534290	7853252	534774	7854065	1	cattle	0	NA	Hyaena	N	N	N
625	625	2012-01-11	2011-10-15	2011	Tsholotsho	Manguta	534867	7852932	534757	7854036	1	cattle	1	cattle	Hyaena	N	N	N
626	626	2011-10-28	2011-10-15	2011	Tsholotsho	nganyana	548100	7882700	547314	7885325	1	cattle	0	NA	Lion	N	N	N
627	627	2011-10-28	2011-10-15	2011	Tsholotsho	nganyana	548122	7881361	548122	7881914	1	donkey	0	NA	Lion	N	N	N
628	628	2011-10-19	2011-10-15	2011	Tsholotsho	nganyana	548738	7882173	546869	7883807	1	cattle	0	NA	Lion	N	N	N
629	629	2011-10-28	2011-10-16	2011	Tsholotsho	zandile	550250	7878922	548901	7877807	1	cattle	1	cattle	Hyaena	N	N	NA
630	630	2011-10-28	2011-10-16	2011	Tsholotsho	zandile	550250	7878922	548901	7877807	1	cattle	1	cattle	Hyaena	N	N	N
631	631	2011-10-27	2011-10-18	2011	Tsholotsho	Nganyana	548735	7882172	547314	7885325	1	cattle	0	NA	Lion	N	N	NA
632	632	2011-10-27	2011-10-18	2011	Tsholotsho	Nganyana	548735	7882172	547314	7885325	1	cattle	0	NA	Lion	N	N	NA
633	633	2011-10-27	2011-10-18	2011	Tsholotsho	nganyana	548735	7882172	547314	7885325	1	cattle	0	NA	Lion	N	N	N
634	634	2011-10-27	2011-10-19	2011	Tsholotsho	Ngamo	489927	7937799	547611	7886179	2	cattle	0	NA	Lion	N	N	NA
635	635	2011-10-27	2011-10-19	2011	Tsholotsho	Ngamo	489927	7937799	547611	7886179	1	cattle	0	NA	Lion	N	N	NA
636	636	2011-10-27	2011-10-19	2011	Tsholotsho	ngamo	489927	7937799	547611	7886179	2	cattle	0	NA	Lion	N	D	N
637	637	2011-10-27	2011-10-19	2011	Tsholotsho	ngamo	489927	7937799	547611	7886179	1	cattle	0	NA	Lion	N	D	N
638	638	2011-10-27	2011-10-20	2011	Tsholotsho	Nganyana	489927	7937799	547314	7885325	1	cattle	1	cattle	Lion	Y	N	NA
639	639	2011-10-27	2011-10-20	2011	Tsholotsho	nganyana	489927	7937799	547314	7885325	1	cattle	1	cattle	Lion	Y	N	N
640	640	2011-12-03	2011-10-30	2011	Tsholotsho	Mashula	540196	7861112	539322	7860073	1	donkey	0	NA	Hyaena	N	N	Y
641	641	2011-12-01	2011-10-30	2011	Tsholotsho	sodaka	509377	7855268	510998	7859404	0	NA	2	cattle	Hyaena	N	N	Y
642	642	2011-12-03	2011-10-30	2011	Tsholotsho	Mashula	540196	7861112	539322	7860073	1	donkey	0	NA	Hyaena	N	N	Y
643	643	2011-12-02	2011-11-01	2011	Tsholotsho	Dibutibu	570953	7890430	573879	7893652	1	cattle	0	NA	Hyaena	N	N	Y
644	644	2011-12-02	2011-11-01	2011	Tsholotsho	Dibutibu	570953	7890430	570962	7890466	1	goat	0	NA	Hyaena	Y	N	NA
645	645	2011-12-02	2011-11-01	2011	Tsholotsho	Dibutibu	570963	7890430	570962	7893460	1	cattle	0	NA	Hyaena	Y	N	N
646	646	2011-12-02	2011-11-01	2011	Tsholotsho	Dibutibu	570953	7890430	573879	7893652	1	cattle	0	NA	Hyaena	N	N	N
647	647	2012-05-03	2011-11-03	2011	Tsholotsho	gwabazabuya	499678	7852150	497088	7851280	1	cattle	1	cattle	Hyaena	N	N	NA
648	648	2011-12-09	2011-11-05	2011	Mabale	Hankano	527091	7945302	527601	7944133	1	cattle	0	NA	Lion	N	D	NA
649	649	2011-12-09	2011-11-05	2011	Mabale	Hankano	527091	7945302	527601	7944133	1	cattle	0	NA	Lion	N	D	NA
652	652	2011-12-09	2011-11-15	2011	Mabale	Hankano	527103	7845440	527363	7944533	1	cattle	0	NA	Lion	N	N	NA
654	654	2011-12-09	2011-11-15	2011	Mabale	Hankano	526766	7945629	526719	7945622	1	goat	0	NA	Lion	N	N	NA
655	655	2011-12-09	2011-11-15	2011	Mabale	Hankano	526766	7943629	526736	7945597	2	cattle	0	NA	Lion	N	N	NA
656	656	2011-12-09	2011-11-15	2011	Mabale	Hankano	527041	7945527	527044	7945562	1	goat	0	NA	Lion	N	N	NA
657	657	2011-12-09	2011-11-15	2011	Mabale	Hankano	527216	7945749	527610	7944147	0	NA	1	cattle	Lion	N	D	NA
658	658	2011-12-09	2011-11-15	2011	Mabale	Hankano	526620	7945881	526603	7945883	1	pig	1	cattle	Lion	N	N	NA
659	659	2012-02-01	2011-11-15	2011	Mabale	Chimwaravillage4	532603	7936052	533998	7936731	1	cattle	0	NA	Lion	N	D	NA
660	660	2012-02-01	2011-11-15	2011	Mabale	Chimwaravillage4	533076	7932241	531519	7930295	2	cattle	0	NA	Lion	N	D	N
661	661	2012-02-09	2011-11-15	2011	Mabale	Dopota	500643	7948988	500803	7947004	3	cattle	0	NA	Lion	N	N	Y
662	662	2011-12-01	2011-11-15	2011	Tsholotsho	sihazela	520505	7853623	518016	7856876	1	cattle	0	NA	Hyaena	N	N	NA
663	663	2011-12-01	2011-11-15	2011	Tsholotsho	makeni	522757	7857252	516613	7861369	0	NA	1	cattle	Hyaena	N	N	NA
664	664	2011-12-01	2011-11-15	2011	Tsholotsho	makeni	522974	7857587	525596	7865970	2	cattle	1	cattle	Hyaena	N	N	NA
665	665	2011-12-02	2011-11-15	2011	Tsholotsho	Dibutibu	572245	7891373	568260	7893091	1	cattle	0	NA	Hyaena	N	N	NA
666	666	2011-12-01	2011-11-15	2011	Tsholotsho	makeni	522974	7857587	525596	7865970	2	cattle	1	cattle	Hyaena	N	N	N
667	667	2011-12-01	2011-11-15	2011	Tsholotsho	makeni	522757	7857252	516613	7861369	0	NA	1	cattle	Hyaena	N	N	N
668	668	2011-12-01	2011-11-15	2011	Tsholotsho	Sihazela	520505	7853623	518016	7856876	1	cattle	0	NA	Hyaena	N	N	N
669	669	2011-12-09	2011-11-15	2011	Mabale	Hankano	526620	7945881	526603	7945883	1	pig	1	cattle	Lion	N	N	NA
670	670	2011-12-09	2011-11-15	2011	Mabale	Hankano	527216	7945749	527610	7944147	0	NA	1	cattle	Lion	N	D	NA
671	671	2011-12-09	2011-11-15	2011	Mabale	Hankano	527041	7945527	527044	7945562	1	goat	0	NA	Lion	N	N	NA
672	672	2011-12-09	2011-11-15	2011	Mabale	Hankano	526766	7945629	526736	7945597	2	cattle	0	NA	Lion	N	N	NA
673	673	2011-12-09	2011-11-15	2011	Mabale	Hankano	526766	7945629	526719	7945622	1	goat	0	NA	Lion	N	N	NA
674	674	2011-12-09	2011-11-15	2011	Mabale	Hankano	527062	7945403	527610	7944147	0	NA	2	cattle	Lion	N	N	NA
675	675	2011-12-09	2011-11-15	2011	Mabale	Hankano	527103	7945440	527363	7944533	1	cattle	0	NA	Lion	N	N	NA
676	676	2011-12-09	2011-11-15	2011	Mabale	Hankano	527103	7945440	527104	7945447	0	NA	1	cattle	Lion	Y	N	NA
677	677	2011-12-09	2011-11-15	2011	Mabale	Hankano	527062	7945403	527137	7945454	0	NA	1	cattle	Lion	Y	N	NA
678	678	2011-12-02	2011-11-15	2011	Tsholotsho	Dibutibu	572245	7891373	568260	7893091	1	cattle	0	NA	Hyaena	N	N	N
679	679	2011-12-02	2011-11-15	2011	Tsholotsho	Hobho	571160	7892573	575564	7893371	2	cattle	1	cattle	Hyaena	N	N	Y
680	680	2011-11-21	2011-11-20	2011	Mabale	Dete	485419	7942286	485419	7942286	2	cattle	0	NA	Lion	Y	N	NA
681	681	2011-11-21	2011-11-20	2011	Mabale	Dete	485419	7942286	485419	7942286	2	cattle	0	NA	Lion	Y	N	N
682	682	2011-12-01	2011-11-22	2011	Tsholotsho	bonke	516797	7847046	523971	7847890	1	cattle	0	NA	Hyaena	N	N	Y
683	683	2011-12-01	2011-11-22	2011	Tsholotsho	bonke	516797	7847046	523971	7847890	1	cattle	0	NA	Hyaena	N	N	Y
684	684	2011-12-02	2011-11-23	2011	Tsholotsho	Dibutibu	572485	7894655	571901	7896118	2	cattle	0	NA	Hyaena	N	N	NA
685	685	2011-12-02	2011-11-23	2011	Tsholotsho	Hobho	572485	7894655	571901	7896118	0	NA	5	cattle	Hyaena	N	N	N
686	686	2011-12-09	2011-11-25	2011	Mabale	Hankano	526766	7945629	526719	7945622	10	goat	0	NA	Lion	Y	N	NA
687	687	2011-12-09	2011-11-25	2011	Mabale	Hankano	526854	7954632	526858	7945628	0	NA	1	cattle	Lion	N	N	NA
688	688	2011-12-09	2011-11-25	2011	Mabale	Hankano	527764	7945712	527759	7945710	1	donkey	0	NA	Lion	Y	N	NA
689	689	2011-12-09	2011-11-25	2011	Mabale	Hankano	526811	7845763	527116	7944557	1	cattle	0	NA	Lion	N	N	NA
690	690	2011-12-01	2011-11-25	2011	Tsholotsho	vusani	532200	7850536	533456	7861369	2	cattle	0	NA	Hyaena	N	N	NA
691	691	2011-12-02	2011-11-25	2011	Tsholotsho	Dibutibu	573710	7891644	568546	7894494	1	cattle	0	NA	Hyaena	N	N	NA
692	692	2011-12-02	2011-11-25	2011	Tsholotsho	Dibutibu	571967	7891362	573037	7888318	3	cattle	3	cattle	Hyaena	N	N	Y
693	693	2012-03-25	2011-11-25	2011	Tsholotsho	Hobho	572680	7894521	572380	7895568	1	cattle	0	NA	Hyaena	N	N	NA
694	694	2011-12-01	2011-11-25	2011	Tsholotsho	Vusani	532200	7850536	533456	7861369	2	cattle	0	NA	Hyaena	N	N	N
695	695	2011-12-09	2011-11-25	2011	Mabale	Hankano	526811	7845763	527116	7944557	1	cattle	1	cattle	Lion	N	N	NA
696	696	2011-12-09	2011-11-25	2011	Mabale	Hankano	527764	7945712	527759	7945710	1	donkey	0	NA	Lion	Y	N	NA
697	697	2011-12-09	2011-11-25	2011	Mabale	Hankano	526854	7945632	526858	7945628	0	NA	1	goat	Lion	N	N	NA
698	698	2011-12-02	2011-11-25	2011	Tsholotsho	Dibutibu	571697	7891362	573037	7888318	6	cattle	0	NA	Hyaena	N	N	N
699	699	2011-12-02	2011-11-25	2011	Tsholotsho	Dibutibu	573710	7891644	568546	7894494	1	cattle	0	NA	Hyaena	N	N	N
700	700	2011-12-01	2011-11-26	2011	Tsholotsho	sodaka	509980	7855023	510993	7854936	0	NA	1	goat	Hyaena	N	N	Y
701	701	2011-12-01	2011-11-26	2011	Tsholotsho	sodaka	509980	7855023	510993	7854936	0	NA	3	cattle	Hyaena	N	N	Y
702	702	2011-12-01	2011-11-29	2011	Tsholotsho	sodaka	509565	7855153	510998	7857439	2	donkey	0	NA	Hyaena	N	N	NA
703	703	2011-12-01	2011-11-29	2011	Tsholotsho	sodaka	509565	7855153	510998	7857439	2	donkey	1	donkey	Hyaena	N	N	N
704	704	2011-12-01	2011-11-30	2011	Tsholotsho	sodaka	509377	7855268	510998	7859404	0	NA	1	cattle	Hyaena	N	N	Y
705	705	2012-02-01	2011-12-05	2011	Mabale	Chimwaravillage3	533184	7930924	534373	7935482	0	NA	1	cattle	Lion	N	D	NA
706	706	2012-02-01	2011-12-05	2011	Mabale	Chimwaravillage4	533103	7932549	534373	7935482	1	cattle	0	NA	Lion	N	D	NA
707	707	2012-02-09	2011-12-05	2011	Mabale	Dopota	498888	7949949	499404	7949261	1	cattle	0	NA	Lion	N	N	Y
708	708	2012-10-03	2011-12-05	2011	Tsholotsho	makeni	520770	7853725	517380	7854556	1	cattle	0	NA	Hyaena	N	N	N
709	709	2012-01-14	2011-12-05	2011	Tsholotsho	Ndodana	524572	7363919	528964	7866142	2	donkey	0	NA	Hyaena	N	N	N
710	710	2012-01-20	2011-12-09	2011	Mabale	Mazwa	529093	7939247	529070	7939258	1	cattle	0	NA	Lion	Y	N	NA
711	711	2012-01-20	2011-12-10	2011	Mabale	Mazwa	529316	7939319	528863	7940228	1	cattle	0	NA	Lion	N	D	NA
712	712	2012-01-12	2011-12-14	2011	Tsholotsho	mtshayeli	535406	7865128	536263	7847333	1	cattle	0	NA	Lion	N	N	N
713	713	2012-02-01	2011-12-15	2011	Mabale	Chimwaravillage3	533188	7930925	532526	7930288	1	cattle	0	NA	Lion	N	N	NA
714	714	2012-02-01	2011-12-15	2011	Mabale	Chimwaravillage5	534831	7932920	533741	7935010	1	cattle	0	NA	Lion	N	D	N
715	715	2012-01-12	2011-12-15	2011	Tsholotsho	Vozheka	554602	7883829	557669	7885944	1	cattle	0	NA	Hyaena	N	N	N
716	716	2012-01-11	2011-12-15	2011	Tsholotsho	Ndodana	525655	7864406	526569	7866487	1	cattle	0	NA	Lion	N	D	N
717	717	2012-01-11	2011-12-15	2011	Tsholotsho	Ndodana	524572	7363919	530929	7866703	1	cattle	0	NA	Lion	N	D	N
718	718	2012-01-11	2011-12-15	2011	Tsholotsho	manguta	535322	7852927	539070	7858562	0	cattle	3	cattle	Hyaena	N	N	N
719	719	2012-02-01	2011-12-17	2011	Mabale	Chimwaravillage4	533103	7932549	533112	7932500	1	goat	0	NA	Lion	N	N	NA
720	720	2012-01-18	2011-12-25	2011	Mabale	Hankano	523700	7948389	522887	7947121	1	cattle	0	NA	Lion	N	D	N
721	721	2012-02-01	2011-12-25	2011	Mabale	Chimwaravillage2	534821	7929166	536400	7928014	1	donkey	0	NA	Lion	N	D	Y
722	722	2012-02-01	2011-12-25	2011	Mabale	Chimwaravillage2	534821	7929160	534103	7927220	1	donkey	0	NA	Lion	N	D	NA
723	723	2012-02-01	2011-12-25	2011	Mabale	Chimwaravillage2	534448	7929247	533588	7928707	1	cattle	0	NA	Lion	N	D	Y
724	724	2012-01-18	2011-12-25	2011	Mabale	Hankano	523700	7948389	522887	7947121	0	NA	2	cattle	Lion	N	D	NA
725	725	2012-02-01	2011-12-31	2011	Mabale	Chimwaravillage4	533017	792903	533021	7932900	1	donkey	0	NA	Lion	Y	N	NA
726	726	2012-02-01	2011-12-31	2011	Mabale	Chimwaravillage3	533081	7932932	533098	7932946	0	NA	1	cattle	Lion	Y	N	NA
727	727	2012-01-20	2012-01-01	2012	Mabale	Mazwa	529093	7939247	528669	7939354	1	cattle	0	NA	Lion	N	D	NA
728	728	2012-01-20	2012-01-02	2012	Mabale	Mazwa	529093	7939247	528669	7939354	1	donkey	0	NA	Lion	N	D	NA
729	729	2012-01-11	2012-01-02	2012	Tsholotsho	Bemba	529008	7849367	529233	7849311	0	NA	2	cattle	Hyaena	N	N	N
730	730	2012-01-12	2012-01-04	2012	Tsholotsho	Vozheka	555048	7883361	548069	7886126	1	cattle	0	NA	Lion	N	N	N
731	731	2012-02-01	2012-01-05	2012	Mabale	Chimwaravillage4	533087	7931892	532360	7929949	0	NA	1	cattle	Lion	N	D	NA
732	732	2012-02-01	2012-01-05	2012	Mabale	Chimwaravillage5	535010	7932989	535038	7932986	1	cattle	0	NA	Lion	Y	N	NA
733	733	2012-02-01	2012-01-05	2012	Mabale	Chimwaravillage5	535010	7932989	535038	7932986	1	goat	0	NA	Lion	N	N	NA
734	734	2012-01-18	2012-01-05	2012	Mabale	Hankano	523599	7948221	523586	7948244	1	goat	0	NA	Lion	Y	N	NA
735	735	2012-01-18	2012-01-05	2012	Mabale	Hankano	523545	7948037	523529	7948048	1	goat	1	goat	Lion	Y	N	NA
736	736	2012-01-18	2012-01-05	2012	Mabale	Hankano	523545	7948037	523529	7948048	2	pig	0	NA	Lion	Y	N	NA
737	737	2012-01-20	2012-01-05	2012	Mabale	Mazwa	529303	7939177	529288	7939180	0	NA	1	cattle	Lion	Y	N	NA
738	738	2012-01-18	2012-01-11	2012	Mabale	Hankano	523713	7948108	522685	7949642	1	cattle	0	NA	Lion	N	D	N
739	739	2012-01-18	2012-01-11	2012	Mabale	Hankano	523713	7948108	522685	7949642	1	cattle	0	NA	Lion	N	D	NA
740	740	2012-01-18	2012-01-15	2012	Mabale	GwaaiVillage2	520483	7944043	521322	7944842	1	donkey	0	NA	Lion	N	D	N
741	741	2012-10-17	2012-01-15	2012	Mabale	mambanje	479857	7948250	479718	7948125	2	goat	0	NA	Leopard	N	N	NA
742	742	2012-01-18	2012-01-15	2012	Mabale	gwaaivillage	520483	7944043	521322	7944842	1	donkey	0	NA	Lion	N	D	NA
743	743	2012-05-02	2012-01-15	2012	Tsholotsho	dzimidza	513288	7850100	507665	7849086	1	cattle	0	NA	Hyaena	N	N	NA
744	744	2012-01-27	2012-01-17	2012	Mabale	Magoli	486939	7946317	484939	7944358	1	cattle	0	NA	Lion	N	D	Y
745	745	2012-02-08	2012-01-25	2012	Mabale	Dete	485428	7942316	485423	7942313	2	cattle	0	NA	Lion	Y	N	NA
746	746	2012-02-09	2012-01-25	2012	Mabale	Dopota	501998	7947467	501930	7944919	3	cattle	0	NA	Lion	N	N	Y
747	747	2012-02-08	2012-01-26	2012	Mabale	Magoli	488612	7947012	489966	7945705	2	cattle	0	NA	Lion	N	D	Y
748	748	2012-02-08	2012-01-26	2012	Mabale	Magoli	488477	7947122	489966	7945705	1	cattle	0	NA	Lion	N	D	N
749	749	2012-02-01	2012-01-29	2012	Mabale	Chimwaravillage3	534254	7929718	534013	7927668	1	cattle	0	NA	Lion	N	N	N
750	750	2012-02-01	2012-01-31	2012	Mabale	Chimwaravillage4	533070	7932944	532343	7935993	1	cattle	0	NA	Lion	N	D	NA
751	751	2012-03-26	2012-02-05	2012	Tsholotsho	Vozheka	554662	7883755	553095	7883319	1	donkey	0	NA	Hyaena	N	N	Y
752	752	2012-05-04	2012-02-05	2012	Tsholotsho	emanaleni	500352	7857624	498319	7859591	1	cattle	0	NA	Hyaena	N	N	NA
753	753	2012-05-04	2012-02-05	2012	Tsholotsho	gibixhegu	497782	7854274	496354	7853205	1	cattle	0	NA	Hyaena	N	N	NA
754	754	2012-02-09	2012-02-06	2012	Mabale	Dopota	498888	7949949	498616	7950096	1	goat	0	NA	Leopard	N	N	NA
755	755	2012-03-09	2012-02-06	2012	Mabale	Mazwa	530165	7939219	530761	7938212	2	cattle	1	cattle	Lion	N	D	N
756	756	2012-02-10	2012-02-09	2012	Mabale	Magoli	486939	7946317	488704	7946689	0	NA	1	goat	Lion	N	D	NA
757	757	2012-03-09	2012-02-09	2012	Mabale	Mazwa	530059	7939225	526265	7939842	0	NA	1	goat	Lion	N	D	NA
758	758	2012-02-21	2012-02-10	2012	Mabale	Jwapi	492324	7951403	492417	7948381	1	cattle	0	NA	Lion	N	D	Y
759	759	2012-03-25	2012-02-12	2012	Tsholotsho	Dibutibu	570347	7885282	570300	7885280	3	cattle	0	NA	Hyaena	N	N	NA
760	760	2012-02-21	2012-02-14	2012	Mabale	Dingani	488383	7949256	488177	7949495	1	goat	0	NA	Hyaena	N	D	N
761	761	2012-03-26	2012-02-15	2012	Tsholotsho	Vozheka	554486	7883776	553096	7883321	1	donkey	0	NA	Hyaena	N	N	N
762	762	2012-03-25	2012-02-15	2012	Tsholotsho	Hobho	571625	7893144	566331	7893686	1	cattle	0	NA	Lion	N	N	NA
763	763	2012-03-25	2012-02-15	2012	Tsholotsho	Hobho	571346	7890496	570286	7891766	1	cattle	0	NA	Lion	N	D	NA
764	764	2012-03-25	2012-02-15	2012	Tsholotsho	Hobho	570955	7890433	570786	7890180	2	donkey	0	NA	Hyaena	N	N	NA
765	765	2012-05-04	2012-02-15	2012	Tsholotsho	gwabazabuya	500196	7852218	504051	7854515	1	cattle	0	NA	Hyaena	N	N	NA
766	766	2012-02-20	2012-02-18	2012	Mabale	Magoli	487789	7946305	487864	7945838	1	donkey	0	NA	Lion	N	N	NA
767	767	2012-02-21	2012-02-20	2012	Mabale	Magoli	486566	7945050	486565	7945051	0	NA	1	donkey	Lion	Y	N	NA
768	768	2012-02-21	2012-02-20	2012	Mabale	Dingani	488308	7949482	488245	7949537	1	goat	0	NA	Hyaena	Y	N	NA
769	769	2012-02-27	2012-02-25	2012	Mabale	Magoli	487079	7945961	487076	7945981	1	donkey	0	NA	Lion	Y	N	NA
770	770	2012-02-27	2012-02-25	2012	Mabale	Magoli	487079	7945961	487076	7945981	1	donkey	0	NA	Lion	Y	N	NA
771	771	2012-03-26	2012-02-25	2012	Tsholotsho	Dibutibu	568331	7885977	571217	7889892	1	cattle	0	NA	Lion	N	D	N
772	772	2012-05-03	2012-02-25	2012	Tsholotsho	Mashula	539915	7861590	539302	7860440	1	donkey	0	NA	Hyaena	N	N	NA
773	773	2012-02-27	2012-02-26	2012	Mabale	Magoli	488192	7945887	488460	7945713	1	goat	0	NA	Hyaena	N	D	NA
774	774	2012-02-27	2012-02-26	2012	Mabale	Magoli	488149	7945687	488218	7945462	0	NA	1	cattle	Hyaena	N	D	NA
775	775	2012-03-17	2012-03-01	2012	Mabale	Hankano	529085	7939244	527354	7939298	0	NA	1	cattle	Lion	N	N	NA
776	776	2012-03-25	2012-03-01	2012	Tsholotsho	Dibutibu	568331	7855977	568647	7885992	1	donkey	0	NA	Hyaena	N	N	N
777	777	2012-03-25	2012-03-01	2012	Tsholotsho	Dibutibu	567883	7885217	565900	7885363	0	NA	1	cattle	Hyaena	N	N	Y
778	778	2012-03-25	2012-03-05	2012	Tsholotsho	Dibutibu	569826	7886345	572490	7881946	1	cattle	0	NA	Hyaena	N	N	NA
779	779	2012-05-04	2012-03-05	2012	Tsholotsho	emanaleni	499841	7857546	498058	7857171	1	cattle	0	NA	Hyaena	N	N	NA
780	780	2012-05-04	2012-03-05	2012	Tsholotsho	gibixhegu	497988	7854445	497337	7850913	1	cattle	2	cattle	Hyaena	N	N	NA
781	781	2012-05-02	2012-03-05	2012	Tsholotsho	dzimidza	513249	7850082	511107	7847886	1	cattle	0	NA	Hyaena	N	N	NA
782	782	2012-06-28	2012-03-05	2012	Tsholotsho	Lupane	574915	7885400	580055	7886073	1	cattle	0	NA	Lion	N	N	NA
783	783	2012-05-04	2012-03-06	2012	Tsholotsho	emanaleni	499333	7857465	498276	7857960	1	cattle	0	NA	Hyaena	N	N	NA
784	784	2012-03-25	2012-03-10	2012	Tsholotsho	Dibutibu	570166	7883596	572490	7886950	1	cattle	2	cattle	Hyaena	N	N	NA
785	785	2012-03-20	2012-03-13	2012	Mabale	Magoli	487216	7946937	486209	7944716	0	NA	1	cattle	Lion	N	D	NA
786	786	2012-03-20	2012-03-14	2012	Mabale	Magoli	487501	7947244	486209	7944716	0	NA	1	cattle	Lion	N	D	NA
787	787	2012-05-04	2012-03-15	2012	Tsholotsho	emanaleni	500057	7857577	501596	7859184	1	cattle	1	cattle	Hyaena	N	N	NA
788	788	2012-10-06	2012-03-15	2012	Tsholotsho	emanaleni	506374	7855077	506282	7854976	1	donkey	0	NA	Hyaena	N	N	Y
789	789	2012-10-03	2012-03-15	2012	Tsholotsho	Mvana	556544	7875849	557772	7881772	1	cattle	0	NA	Hyaena	N	N	Y
790	790	2012-10-03	2012-03-15	2012	Tsholotsho	Mvana	556150	7881772	557454	7880095	1	cattle	0	NA	Hyaena	N	N	Y
791	791	2012-03-25	2012-03-16	2012	Tsholotsho	Dibutibu	569826	7886345	571266	7892868	2	donkey	0	NA	Lion	N	N	NA
792	792	2012-03-25	2012-03-18	2012	Tsholotsho	Hobho	571211	7892700	571803	7890316	2	donkey	0	NA	Lion	N	N	NA
793	793	2012-03-26	2012-03-21	2012	Tsholotsho	Vozheka	554885	7883343	554899	7883346	2	goat	0	NA	Hyaena	Y	N	NA
794	794	2012-03-26	2012-03-21	2012	Tsholotsho	Stambaranew	552606	7883454	553045	7882607	1	cattle	0	NA	Hyaena	N	N	N
795	795	2012-04-17	2012-03-22	2012	Mabale	Manganganga	554408	7932687	552672	7928306	4	cattle	0	NA	Lion	N	N	NA
796	796	2012-04-17	2012-03-25	2012	Mabale	Manganganga	551922	793500	551972	7929990	2	cattle	0	NA	Lion	N	D	NA
797	797	2012-05-04	2012-03-25	2012	Tsholotsho	emanaleni	500869	7857707	501526	7859448	1	cattle	0	NA	Hyaena	N	N	NA
798	798	2012-05-03	2012-03-25	2012	Tsholotsho	dzimidza	512996	7850187	511571	7848441	1	donkey	0	NA	Hyaena	N	N	NA
799	799	2012-05-02	2012-04-05	2012	Tsholotsho	Ndodana	524541	7863917	523999	7863893	1	cattle	0	NA	Hyaena	N	D	NA
800	800	2012-05-02	2012-04-05	2012	Tsholotsho	gwenga	542587	7870349	534672	7872692	2	cattle	0	NA	Lion	N	N	NA
801	801	2012-04-17	2012-04-14	2012	Mabale	Gundwane	542053	7929399	542998	7931631	1	donkey	0	NA	Lion	N	N	NA
802	802	2012-04-17	2012-04-15	2012	Mabale	Gundwane	541876	7929556	542468	7931927	0	NA	1	cattle	Lion	N	N	NA
803	803	2012-05-02	2012-04-15	2012	Tsholotsho	gwenga	542110	7870228	536637	7873674	1	cattle	0	NA	Lion	N	D	NA
804	804	2012-05-02	2012-04-15	2012	Tsholotsho	ziga	550112	7875506	542860	7874329	3	cattle	0	NA	Lion	N	N	NA
805	805	2012-05-02	2012-04-15	2012	Tsholotsho	makeni	522969	7857605	520917	7857626	1	donkey	1	donkey	Hyaena	N	N	NA
806	806	2012-05-02	2012-04-15	2012	Tsholotsho	makeni	522074	7856693	522020	7856562	1	donkey	0	NA	Hyaena	N	N	NA
807	807	2012-06-29	2012-04-15	2012	Tsholotsho	Lupane	588738	7884620	588637	7884417	2	donkey	0	NA	Lion	N	N	NA
808	808	2012-06-27	2012-04-15	2012	Tsholotsho	Bemba	528765	7849149	527704	7847694	1	donkey	0	NA	Hyaena	N	N	NA
809	809	2012-06-28	2012-04-15	2012	Tsholotsho	Lupane	578595	7884329	577467	7882936	1	cattle	0	NA	Lion	N	N	NA
810	810	2012-06-27	2012-04-15	2012	Tsholotsho	manguta	533195	7851834	528964	7864738	1	cattle	0	NA	Hyaena	N	N	NA
811	811	2012-10-04	2012-04-15	2012	Tsholotsho	sihazela	520770	7853725	521352	7854312	1	donkey	0	NA	Hyaena	N	N	N
812	812	2012-06-29	2012-04-15	2012	Mabale	Gwaai	588738	7884620	588637	7884417	2	donkey	1	donkey	Lion	N	N	Y
813	813	2012-05-04	2012-04-25	2012	Tsholotsho	Nsingweni	514032	7854341	516161	7854329	2	donkey	0	NA	Hyaena	N	N	NA
814	814	2012-05-04	2012-04-25	2012	Tsholotsho	zanqaweni	502489	7854088	501922	7855498	1	donkey	0	NA	Hyaena	N	N	NA
815	815	2012-05-04	2012-04-25	2012	Tsholotsho	sihazela	520543	7854331	523046	7859755	1	cattle	1	cattle	Hyaena	N	N	NA
816	816	2012-05-02	2012-04-25	2012	Tsholotsho	makeni	522864	7857270	520426	7856480	1	cattle	0	NA	Hyaena	N	N	NA
817	817	2012-05-04	2012-04-25	2012	Tsholotsho	gibixhegu	497210	7853961	496027	7852386	1	cattle	0	NA	Hyaena	N	N	NA
818	818	2012-05-02	2012-04-25	2012	Tsholotsho	makeni	522932	7857503	540567	7868434	1	donkey	1	donkey	Hyaena	N	N	NA
819	819	2012-05-04	2012-04-25	2012	Tsholotsho	gibixhegu	497477	7854109	496190	7852059	1	cattle	0	NA	Hyaena	N	N	NA
820	820	2012-05-02	2012-04-25	2012	Tsholotsho	ziga	550096	7875833	543024	7874002	2	cattle	0	NA	Lion	N	N	NA
821	821	2012-05-03	2012-04-25	2012	Tsholotsho	gwabazabuya	499675	7851961	497606	7849584	1	cattle	0	NA	Hyaena	N	D	NA
822	822	2012-06-27	2012-04-25	2012	Tsholotsho	Bemba	529301	7849058	528234	7848736	1	donkey	1	donkey	Hyaena	N	N	NA
823	823	2012-05-02	2012-04-26	2012	Tsholotsho	Mhlabeni	538078	7872369	537918	7872360	1	cattle	0	NA	Lion	N	N	NA
824	824	2012-05-02	2012-04-26	2012	Tsholotsho	Mhlabeni	538078	7872369	537961	7872355	1	cattle	0	NA	Lion	N	N	NA
825	825	2012-05-02	2012-04-26	2012	Tsholotsho	Mhlabeni	538078	7872369	537856	7872355	1	cattle	0	NA	Lion	N	N	NA
826	826	2012-06-28	2012-04-26	2012	Tsholotsho	Dibutibu	570480	7885302	572195	7887195	2	cattle	2	cattle	Hyaena	N	N	NA
827	827	2012-05-02	2012-05-01	2012	Tsholotsho	Mlevu	546444	7869786	547315	7870847	1	cattle	0	NA	Lion	N	D	NA
828	828	2012-05-02	2012-05-01	2012	Tsholotsho	Mlevu	546444	7869786	547360	7870804	1	cattle	0	NA	Lion	N	D	NA
829	829	2012-05-02	2012-05-01	2012	Tsholotsho	mlevu	546444	7869786	547336	7870823	1	cattle	2	cattle	Lion	N	D	NA
830	830	2012-06-27	2012-05-01	2012	Tsholotsho	Bemba	528959	7849624	527929	7849195	1	donkey	0	NA	Hyaena	N	N	NA
831	831	2012-05-03	2012-05-02	2012	Tsholotsho	Mlevu	546173	7868942	546370	7869971	1	donkey	0	NA	Lion	N	N	NA
832	832	2012-05-03	2012-05-02	2012	Tsholotsho	Mlevu	545280	7869318	546377	7869907	1	donkey	0	NA	Lion	N	N	NA
833	833	2012-05-26	2012-05-05	2012	Mabale	Jwapi	492810	7952021	492424	7948391	1	cattle	3	cattle	Lion	N	D	NA
834	834	2012-06-28	2012-05-05	2012	Tsholotsho	Dibutibu	571308	7885485	572303	7885303	1	cattle	0	NA	Hyaena	N	N	NA
835	835	2012-05-26	2012-05-15	2012	Mabale	Lupote	498931	7954742	498929	7954730	2	cattle	0	NA	Lion	Y	N	NA
836	836	2012-05-26	2012-05-15	2012	Mabale	Jwapi	493109	7951799	493460	7952754	0	NA	1	cattle	Hyaena	N	N	NA
837	837	2012-06-27	2012-05-15	2012	Tsholotsho	Nyemba	557258	7870652	555028	7874241	3	cattle	0	NA	Lion	N	N	NA
838	838	2012-06-26	2012-05-15	2012	Tsholotsho	emanaleni	502860	7857713	501937	7857875	2	cattle	1	cattle	Hyaena	N	N	NA
839	839	2012-05-26	2012-05-16	2012	Mabale	Dingani	488743	7951072	488750	7951042	3	cattle	0	NA	Hyaena	Y	N	NA
840	840	2012-05-24	2012-05-20	2012	Mabale	Magoli	487684	7949344	486810	7949536	1	cattle	0	NA	Lion	N	D	NA
841	841	2012-05-24	2012-05-21	2012	Mabale	Magoli	487988	7948249	487986	7948237	1	goat	0	NA	Hyaena	N	N	NA
842	842	2012-05-24	2012-05-23	2012	Mabale	Magoli	486352	7949058	486617	7949614	0	NA	1	cattle	Lion	N	D	NA
843	843	2012-06-27	2012-05-25	2012	Tsholotsho	Bemba	528959	7849624	527690	7848125	1	donkey	0	NA	Hyaena	N	N	NA
844	844	2012-10-04	2012-05-25	2012	Tsholotsho	sihazela	520533	7854305	520832	7857193	1	cattle	0	NA	Hyaena	N	N	NA
845	845	2012-10-06	2012-05-25	2012	Tsholotsho	sodaka	509414	7855335	511276	7856384	0	NA	1	cattle	Hyaena	N	D	Y
846	846	2012-06-07	2012-05-31	2012	Mabale	Tinde	520709	7978901	520704	7978141	1	donkey	0	NA	Lion	N	N	NA
847	847	2012-06-07	2012-05-31	2012	Mabale	Tinde	521360	7980089	521259	7981769	2	donkey	0	NA	Lion	N	N	NA
848	848	2012-06-26	2012-06-01	2012	Tsholotsho	Ndodana	524532	7863909	522827	7865055	1	donkey	0	NA	Lion	N	N	NA
849	849	2012-06-07	2012-06-03	2012	Mabale	Tinde	523082	7984320	522569	7983190	1	donkey	0	NA	Lion	N	N	NA
850	850	2012-06-07	2012-06-04	2012	Mabale	Tinde	522445	7983641	522548	7983247	1	donkey	0	NA	Lion	N	N	NA
851	851	2012-06-07	2012-06-05	2012	Mabale	Tinde	522445	7983641	522343	7983073	1	donkey	0	NA	Lion	N	N	NA
852	852	2012-06-27	2012-06-05	2012	Tsholotsho	Bemba	529192	7848917	528493	7848271	1	donkey	0	NA	Hyaena	N	N	NA
853	853	2012-06-27	2012-06-05	2012	Tsholotsho	Bemba	528959	7849624	528248	7847921	1	donkey	0	NA	Hyaena	N	N	NA
854	854	2012-06-27	2012-06-05	2012	Tsholotsho	Bemba	529068	7849250	527747	7847705	1	donkey	0	NA	Hyaena	N	N	NA
855	855	2012-10-04	2012-06-05	2012	Tsholotsho	sihazela	520532	7854305	520946	7854469	1	cattle	0	NA	Hyaena	N	N	N
856	856	2012-06-28	2012-06-08	2012	Tsholotsho	Lupane	574915	7885400	567950	7887687	2	cattle	1	cattle	Lion	N	N	NA
857	857	2012-06-28	2012-06-08	2012	Tsholotsho	Mkombolupane	574915	7885400	567950	7887687	2	cattle	0	NA	Lion	N	N	NA
858	858	2012-06-27	2012-06-15	2012	Tsholotsho	Bemba	529193	7848916	529150	7848375	1	donkey	0	NA	Hyaena	N	N	NA
859	859	2012-06-27	2012-06-15	2012	Tsholotsho	Bonke	538466	7864284	536992	7861799	1	donkey	0	NA	Hyaena	N	N	NA
860	860	2012-06-28	2012-06-15	2012	Tsholotsho	stambaraold	553001	7880306	553089	7878010	1	donkey	0	NA	Hyaena	N	N	NA
861	861	2012-06-28	2012-06-15	2012	Tsholotsho	stambaraold	553359	7880609	548255	7885653	1	cattle	0	NA	Lion	N	N	NA
862	862	2012-06-27	2012-06-15	2012	Tsholotsho	bonke	538361	7863950	529245	7853790	1	donkey	0	NA	Hyaena	N	N	NA
863	863	2012-06-26	2012-06-21	2012	Tsholotsho	emanaleni	500860	7857713	502418	7857736	1	cattle	0	NA	Hyaena	N	N	NA
864	864	2012-06-28	2012-06-25	2012	Tsholotsho	Dibutibu	573434	7888315	573369	7890130	2	cattle	1	cattle	Hyaena	N	N	NA
865	865	2012-10-06	2012-06-25	2012	Tsholotsho	emanaleni	506655	7854979	506651	7854982	0	NA	1	cattle	Hyaena	N	N	Y
866	866	2012-10-17	2012-06-26	2012	Mabale	mambanje	479857	7948250	479845	7948250	3	goat	0	NA	Leopard	Y	N	NA
867	867	2012-10-06	2012-06-29	2012	Tsholotsho	sodaka	509414	7855335	509026	7855702	1	cattle	0	NA	Hyaena	N	N	Y
868	868	2012-10-06	2012-07-06	2012	Tsholotsho	emanaleni	506374	7855077	506746	7854581	1	donkey	0	NA	Hyaena	N	N	Y
869	869	2012-10-30	2012-07-15	2012	Mabale	Dopota	499818	7948737	499663	7948701	4	goat	0	NA	Hyaena	Y	N	Y
870	870	2012-10-17	2012-07-15	2012	Mabale	Mambanje	477840	7950514	477496	7950529	2	cattle	0	NA	Leopard	N	D	NA
871	871	2012-10-17	2012-07-15	2012	Mabale	Mambanje	477760	7950679	477767	7950679	3	goat	0	NA	Leopard	Y	N	NA
872	872	2012-10-17	2012-07-15	2012	Mabale	Mambanje	477659	7950487	477668	7950505	1	goat	0	NA	Leopard	Y	N	NA
873	873	2012-10-17	2012-07-15	2012	Mabale	mambanje	477840	7950514	477842	7950494	1	goat	0	NA	Leopard	Y	N	NA
874	874	2012-10-06	2012-07-15	2012	Tsholotsho	sodaka	509696	7855093	510763	7857491	1	cattle	0	NA	Hyaena	N	N	Y
875	875	2012-10-17	2012-07-16	2012	Mabale	mambanje	478180	7949950	478150	7949966	3	goat	0	NA	Leopard	Y	N	NA
876	876	2012-10-17	2012-07-27	2012	Mabale	mambanje	478542	7948999	478562	7949015	2	goat	0	NA	Leopard	Y	N	NA
877	877	2012-10-06	2012-08-02	2012	Tsholotsho	sodaka	508588	7855033	506436	7856365	0	NA	3	cattle	Hyaena	N	N	Y
878	878	2012-10-25	2012-08-05	2012	Mabale	Mazwa	530182	7939210	530434	7939320	2	cattle	0	NA	Lion	N	N	N
879	879	2012-10-06	2012-08-05	2012	Tsholotsho	sodaka	509011	7855350	508348	7857756	1	cattle	1	cattle	Hyaena	N	N	Y
880	880	2012-03-24	2012-08-05	2011	Tsholotsho	Dibutibu	571524	7885546	571977	7885897	1	cattle	0	NA	Hyaena	N	N	NA
881	881	2012-09-19	2012-08-15	2012	Tsholotsho	Ngamo	550542	7883295	547773	7884186	1	cattle	0	NA	Lion	N	N	Y
882	882	2012-09-19	2012-08-15	2012	Tsholotsho	Ngamo	550542	7883293	547754	7884308	1	cattle	0	NA	Lion	N	N	Y
883	883	2012-09-19	2012-08-15	2012	Tsholotsho	Ngamo	550542	7883295	547676	7884230	1	cattle	0	NA	Lion	N	N	N
884	884	2012-10-04	2012-08-15	2012	Tsholotsho	sodaka	509080	7855316	507151	7855043	1	donkey	0	NA	Hyaena	N	N	N
885	885	2012-10-04	2012-08-15	2012	Tsholotsho	sihazela	520533	7854305	518090	7854363	1	cattle	0	NA	Hyaena	N	N	NA
886	886	2012-10-06	2012-08-15	2012	Tsholotsho	sodaka	510330	7855084	510590	7855643	1	donkey	0	NA	Hyaena	N	N	NA
887	887	2012-12-13	2012-08-15	2012	Tsholotsho	makeni	522962	7857594	523474	7859289	1	donkey	0	NA	Hyaena	N	N	NA
888	888	2012-09-19	2012-09-01	2012	Tsholotsho	Nganyana	549654	7882809	547743	7884622	1	cattle	0	NA	Lion	N	D	NA
889	889	2012-09-19	2012-09-01	2012	Tsholotsho	Nganyana	549654	7882809	547692	7884704	1	cattle	0	NA	Lion	N	D	N
890	890	2012-09-19	2012-09-01	2012	Tsholotsho	Nganyana	549654	7882809	547723	7884620	1	cattle	0	NA	Lion	N	D	N
891	891	2012-09-19	2012-09-01	2012	Tsholotsho	nganyana	549654	7882809	547540	7884801	1	cattle	0	NA	Lion	N	D	NA
892	892	2012-09-19	2012-09-01	2012	Tsholotsho	Nganyana	549687	7882809	547629	7884589	1	cattle	0	NA	Lion	N	D	Y
893	893	2012-10-06	2012-09-05	2012	Tsholotsho	Mangutana	536433	7855806	536049	7857107	3	cattle	0	NA	Hyaena	N	N	Y
894	894	2012-10-03	2012-09-11	2012	Tsholotsho	stambaraold	552987	788308	554143	7880789	1	donkey	0	NA	Hyaena	N	N	NA
895	895	2012-10-03	2012-09-15	2012	Tsholotsho	Siwela	553664	7877831	553220	7877691	1	donkey	0	NA	Hyaena	N	N	NA
896	896	2012-10-03	2012-09-15	2012	Tsholotsho	Siwela	553664	7877831	553685	7877846	1	goat	0	NA	Hyaena	Y	N	NA
897	897	2012-10-25	2012-09-15	2012	Mabale	gwaai	519269	7942294	520726	7941319	1	cattle	0	NA	Leopard	N	D	NA
898	898	2012-10-03	2012-09-15	2012	Tsholotsho	Mvana	556688	7875764	557385	7875764	1	cattle	0	NA	Hyaena	N	N	NA
899	899	2012-10-06	2012-09-15	2012	Tsholotsho	emanaleni	503135	7846811	502100	7846811	1	cattle	0	NA	Hyaena	N	N	NA
900	900	2012-10-06	2012-09-15	2012	Tsholotsho	emanaleni	502796	7847218	502578	7847343	1	donkey	0	NA	Hyaena	N	N	Y
901	901	2012-10-06	2012-09-15	2012	Tsholotsho	emanaleni	499606	7857540	500225	7857540	0	NA	1	cattle	Hyaena	N	N	NA
902	902	2012-12-13	2012-09-15	2012	Tsholotsho	makeni	522990	7858120	522988	7850497	1	donkey	0	NA	Hyaena	N	N	Y
903	903	2012-09-20	2012-09-17	2012	Mabale	Ndajila	508901	7947653	509013	7947318	0	NA	1	goat	Hyaena	Y	N	NA
904	904	2012-09-21	2012-09-18	2012	Mabale	Ndajila	508012	7946759	508980	7947741	0	NA	1	goat	Hyaena	N	N	NA
905	905	2012-09-19	2012-09-18	2012	Tsholotsho	Ngamo	550751	7884357	548037	7885703	1	cattle	0	NA	Lion	N	N	NA
906	906	2012-10-04	2012-09-20	2012	Tsholotsho	sihazela	520110	7853517	518408	7853519	1	cattle	0	NA	Hyaena	N	N	NA
907	907	2012-10-02	2012-09-25	2012	Tsholotsho	Ngamo	550524	7883556	551339	7882668	1	cattle	0	NA	Hyaena	N	N	Y
908	908	2012-10-03	2012-09-25	2012	Tsholotsho	Mtshwayeli	553415	7864484	536092	7861207	1	donkey	0	NA	Hyaena	N	N	Y
909	909	2012-10-26	2012-09-25	2012	Mabale	mabale	500639	7951478	500315	7951442	5	goat	0	NA	Hyaena	Y	N	Y
910	910	2012-11-07	2012-09-25	2012	Mabale	mabale	503300	7947554	503260	7947509	3	sheep	1	sheep	Hyaena	Y	N	NA
911	911	2012-10-03	2012-09-25	2012	Tsholotsho	Bonke	539665	7864399	536973	7861963	1	donkey	0	NA	Hyaena	N	N	N
912	912	2012-10-04	2012-09-25	2012	Tsholotsho	Ndodana	525201	7864315	526284	7864315	1	cattle	0	NA	Hyaena	N	N	N
913	913	2012-10-03	2012-09-25	2012	Tsholotsho	Fambatshena	560289	7874930	557065	7875013	0	NA	1	cattle	Hyaena	N	N	NA
914	914	2012-10-06	2012-09-25	2012	Tsholotsho	sodaka	510001	7855027	511089	7854575	1	cattle	0	NA	Hyaena	N	N	N
915	915	2012-10-03	2012-09-25	2012	Tsholotsho	Fambatshena	560289	7874930	557065	7875013	0	NA	1	cattle	Hyaena	N	N	NA
916	916	2012-10-17	2012-09-26	2012	Mabale	mambanje	477760	7950679	477775	7950691	1	cattle	0	NA	Leopard	Y	N	NA
917	917	2012-10-04	2012-10-03	2012	Tsholotsho	Mashula	539624	7861750	536356	7861544	1	cattle	0	NA	Hyaena	N	N	Y
918	918	2012-10-25	2012-10-05	2012	Mabale	Hankano	523656	7948352	522078	7950904	1	cattle	1	cattle	Hyaena	N	N	NA
919	919	2012-11-06	2012-10-06	2012	Mabale	mabale	510640	7947491	510598	7947500	1	goat	0	NA	Hyaena	N	N	Y
920	920	2012-10-26	2012-10-08	2012	Mabale	mabale	501844	7951705	502163	7951671	1	goat	0	NA	Hyaena	N	N	N
921	921	2012-10-30	2012-10-09	2012	Mabale	mabale	503019	7948452	502932	7948232	5	goat	0	NA	Hyaena	Y	N	Y
922	922	2012-10-18	2012-10-13	2012	Mabale	Chezhou	480995	7951257	477390	7950454	1	cattle	0	NA	Leopard	N	D	NA
923	923	2012-10-17	2012-10-14	2012	Mabale	mabale	510610	7947243	510611	7947325	3	goat	2	goat	Hyaena	Y	N	N
924	924	2012-10-25	2012-10-15	2012	Mabale	Hankano	526812	7945766	523630	7950214	1	cattle	0	NA	Hyaena	N	N	Y
925	925	2012-10-24	2012-10-17	2012	Mabale	mabale	502591	7948669	503259	7948246	4	goat	0	NA	Hyaena	N	N	Y
926	926	2012-10-25	2012-10-20	2012	Mabale	Gundwane	542379	7928870	542962	7927445	0	NA	1	cattle	Hyaena	N	N	NA
927	927	2012-11-09	2012-10-22	2012	Mabale	Dopota	500902	7948394	500759	7948047	1	goat	0	NA	Hyaena	Y	N	NA
928	928	2012-11-09	2012-10-22	2012	Mabale	Dopota	500803	7948522	500789	7948619	2	goat	0	NA	Hyaena	Y	N	NA
929	929	2012-10-25	2012-10-24	2012	Mabale	Gundwane	542490	7928914	542323	7933620	1	cattle	0	NA	Lion	N	N	N
930	930	2012-11-01	2012-10-25	2012	Mabale	mabale	508228	7949804	507014	7949129	1	donkey	0	NA	Hyaena	N	N	NA
931	931	2012-11-21	2012-10-25	2012	Mabale	mabale	511072	7950576	511472	7952135	1	cattle	0	NA	Hyaena	N	N	Y
932	932	2012-10-30	2012-10-25	2012	Mabale	mambanje	486333	7948825	486079	7948559	1	donkey	0	NA	Hyaena	N	N	NA
933	933	2012-10-30	2012-10-28	2012	Mabale	magoli	485863	7948921	485852	7948915	1	goat	0	NA	Hyaena	Y	N	NA
934	934	2012-10-31	2012-10-29	2012	Mabale	mabale	505412	7946126	503813	7943302	1	cattle	0	NA	Lion	N	N	N
935	935	2012-11-07	2012-10-31	2012	Mabale	mabale	503300	7947554	503278	7947565	1	goat	1	goat	Hyaena	Y	N	Y
936	936	2012-11-06	2012-11-01	2012	Mabale	mabale	505693	7944522	510008	7947280	1	donkey	0	NA	Hyaena	N	N	N
937	937	2012-11-08	2012-11-01	2012	Mabale	mabale	503037	7948258	502503	7947052	0	NA	3	cattle	Hyaena	N	N	Y
938	938	2012-11-05	2012-11-02	2012	Mabale	mabale	503332	7947257	501506	7945285	1	cattle	0	NA	Hyaena	N	N	N
939	939	2012-11-05	2012-11-04	2012	Mabale	sialwindi	487418	7948648	489858	7947113	0	NA	1	cattle	Hyaena	N	N	NA
940	940	2012-11-05	2012-11-04	2012	Mabale	sialwindi	487633	7948950	489858	7947113	1	cattle	1	cattle	Hyaena	N	N	NA
941	941	2012-11-12	2012-11-05	2012	Mabale	mabale	510860	7947343	510169	7947853	1	donkey	0	NA	Hyaena	N	N	NA
942	942	2012-11-08	2012-11-05	2012	Mabale	dopota	501153	7948052	498973	7946313	1	cattle	0	NA	Hyaena	N	N	Y
943	943	2012-12-13	2012-11-05	2012	Tsholotsho	Bemba	529297	7849065	527093	7853831	1	cattle	0	NA	Hyaena	N	N	Y
944	944	2012-12-13	2012-11-05	2012	Tsholotsho	Nkoba	528742	7864649	530430	7863643	1	donkey	0	NA	Hyaena	N	N	Y
945	945	2012-12-12	2012-11-05	2012	Tsholotsho	ziga	550082	7875971	546575	7879141	1	cattle	0	NA	Leopard	N	N	NA
946	946	2012-12-12	2012-11-05	2012	Tsholotsho	ziga	550023	7876024	545869	7875296	1	cattle	0	NA	Leopard	N	N	NA
947	947	2012-11-12	2012-11-11	2012	Mabale	Jwapi	491912	7952557	494321	7948034	2	cattle	0	NA	Hyaena	N	N	NA
948	948	2012-11-12	2012-11-11	2012	Mabale	Jwapi	492186	7952202	494277	7947946	1	cattle	2	cattle	Hyaena	N	N	NA
949	949	2012-11-27	2012-11-12	2012	Mabale	mabale	505080	7946753	505047	7946760	3	goat	1	goat	Hyaena	Y	N	NA
950	950	2012-11-14	2012-11-13	2012	Mabale	sialwindi	487975	7950250	490891	7947827	3	cattle	1	cattle	Hyaena	N	N	NA
951	951	2012-11-14	2012-11-13	2012	Mabale	sialwindi	487627	7949443	490891	7947827	1	cattle	0	NA	Hyaena	N	N	NA
952	952	2012-11-13	2012-11-13	2012	Mabale	mabale	503435	7947413	502977	7945917	1	cattle	0	NA	Lion	N	D	N
953	953	2012-12-13	2012-11-14	2012	Tsholotsho	Bemba	529138	7849106	530606	7853609	1	cattle	0	NA	Hyaena	N	N	NA
954	954	2012-12-13	2012-11-14	2012	Tsholotsho	Bemba	529001	7849372	525541	7852557	2	cattle	0	NA	Hyaena	N	N	NA
955	955	2012-11-23	2012-11-15	2012	Mabale	mabale	505578	7947263	505582	7947117	3	goat	0	NA	Hyaena	Y	N	NA
956	956	2013-02-20	2012-11-15	2012	Tsholotsho	Dibutibu	571435	7885538	571261	7887070	1	cattle	0	NA	Hyaena	N	N	N
957	957	2013-02-20	2012-11-15	2012	Tsholotsho	Dibutibu	569872	7886252	571809	7884027	1	cattle	0	NA	Lion	N	N	NA
958	958	2012-11-19	2012-11-17	2012	Mabale	mabale	504296	7946197	504263	7947067	1	donkey	0	NA	Hyaena	N	N	Y
959	959	2012-11-28	2012-11-22	2012	Mabale	mabale	508894	7947741	509080	7947978	1	cattle	0	NA	Hyaena	N	N	NA
960	960	2012-11-22	2012-11-22	2012	Mabale	mabale	504336	7947193	504575	7943836	1	cattle	0	NA	Lion	N	D	Y
961	961	2012-11-26	2012-11-23	2012	Mabale	mabale	510066	7946853	511684	7946176	1	cattle	0	NA	Lion	N	D	N
962	962	2012-12-11	2012-11-24	2012	Mabale	mabale	504292	794573	504292	794573	2	goat	0	NA	Hyaena	Y	N	NA
963	963	2012-11-28	2012-11-25	2012	Mabale	mabale	504145	7947526	502515	7945309	1	cattle	0	NA	Lion	N	N	NA
964	964	2012-12-12	2012-11-25	2012	Tsholotsho	stambaraold	552121	7883904	556501	7883486	1	cattle	1	cattle	Lion	N	D	NA
965	965	2012-12-13	2012-11-26	2012	Mabale	mambanje	477799	7950369	477734	7950610	1	cattle	0	NA	Leopard	N	D	NA
967	967	2012-11-30	2012-11-28	2012	Mabale	mabale	505429	7946059	503915	7943676	1	cattle	0	NA	Lion	N	N	NA
968	968	2012-12-12	2012-11-28	2012	Tsholotsho	Vulashaba	534275	7869533	537371	7868988	1	donkey	0	NA	Hyaena	N	N	Y
969	969	2012-12-12	2012-12-01	2012	Mabale	mambanje	479688	7948379	479680	7948122	1	cattle	0	NA	Leopard	N	D	NA
970	970	2013-02-11	2012-12-01	2012	Tsholotsho	ngamo	551223	7884610	550323	7886513	1	cattle	1	cattle	Lion	N	D	NA
971	971	2012-12-06	2012-12-03	2012	Mabale	mabale	505432	7949865	505587	7949733	1	goat	0	NA	Hyaena	Y	N	NA
972	972	2012-12-13	2012-12-04	2012	Tsholotsho	mazilingwane	516342	7853690	516053	7861030	1	cattle	0	NA	Hyaena	N	N	NA
973	973	2012-12-13	2012-12-05	2012	Tsholotsho	makeni	522989	7857923	533656	7852469	1	cattle	0	NA	Hyaena	N	N	NA
974	974	2012-12-13	2012-12-05	2012	Tsholotsho	makeni	522508	7856801	524625	7854619	1	cattle	1	cattle	Hyaena	N	N	NA
975	975	2012-12-13	2012-12-05	2012	Tsholotsho	makeni	522508	7856801	524116	7855117	4	goat	0	NA	Leopard	N	D	NA
976	976	2012-12-13	2012-12-05	2012	Tsholotsho	makeni	522783	7857254	526055	7859612	1	goat	0	NA	Leopard	N	D	NA
977	977	2012-12-12	2012-12-05	2012	Tsholotsho	stambaraold	552121	7883904	555958	7880572	1	cattle	0	NA	Lion	N	N	Y
978	978	2012-12-13	2012-12-07	2012	Tsholotsho	makeni	522962	7857594	523777	7860263	1	donkey	0	NA	Hyaena	N	N	Y
979	979	2013-02-08	2012-12-08	2012	Tsholotsho	mashula	539723	7861887	540445	7858996	1	donkey	0	NA	Hyaena	N	N	Y
980	980	2012-12-17	2012-12-09	2012	Mabale	mabale	508214	7951755	508101	7951566	3	goat	0	NA	Hyaena	Y	N	NA
981	981	2012-12-11	2012-12-09	2012	Tsholotsho	Nganyana	550779	7882402	547589	7884127	1	cattle	0	NA	Lion	N	D	NA
982	982	2012-12-11	2012-12-10	2012	Mabale	mabale	503834	7947676	503699	7947693	1	cattle	0	NA	Hyaena	Y	N	NA
983	983	2012-12-13	2012-12-10	2012	Tsholotsho	Bemba	529297	7849065	526972	7847854	1	donkey	0	NA	Hyaena	N	N	N
984	984	2012-12-12	2012-12-11	2012	Tsholotsho	mlevu	545704	7869293	546854	7872237	1	cattle	0	NA	Leopard	N	N	NA
985	985	2012-12-13	2012-12-11	2012	Tsholotsho	makeni	522962	7837594	525291	7847027	2	donkey	0	NA	Hyaena	N	N	Y
986	986	2012-12-12	2012-12-11	2012	Tsholotsho	Manjelengwa	538491	7868944	537824	7868826	1	donkey	0	NA	Hyaena	N	N	NA
987	987	2012-12-17	2012-12-12	2012	Mabale	mabale	505738	7947681	505885	7947585	6	goat	0	NA	Hyaena	Y	N	Y
988	988	2012-12-19	2012-12-12	2012	Mabale	mabale	505695	7946897	505469	7947069	3	goat	0	NA	Hyaena	N	N	Y
989	989	2012-12-13	2012-12-12	2012	Mabale	dingani	488580	7949727	491419	7951233	1	cattle	0	NA	Hyaena	N	N	NA
990	990	2013-02-04	2012-12-15	2012	Tsholotsho	makeni	522803	7857057	522052	7861843	1	cattle	0	NA	Hyaena	N	N	Y
991	991	2013-01-02	2012-12-20	2012	Mabale	lupote	497358	7952118	496965	7950063	0	NA	1	donkey	Lion	N	D	NA
992	992	2012-12-31	2012-12-21	2012	Mabale	mabale	505760	7945474	0	0	0	NA	1	cattle	Lion	N	D	NA
993	993	2013-02-14	2012-12-23	2012	Tsholotsho	Siwela	553721	7877889	551534	7879743	1	cattle	0	NA	Hyaena	N	N	NA
994	994	2012-12-26	2012-12-24	2012	Mabale	mabale	503224	794578	503501	7947547	1	cattle	0	NA	Hyaena	Y	N	NA
995	995	2012-12-26	2012-12-24	2012	Mabale	mabale	503224	794578	503501	7947547	1	sheep	0	NA	Hyaena	Y	N	NA
996	996	2012-12-12	2012-12-25	2012	Tsholotsho	stambaraold	552202	7883812	558407	7884315	5	cattle	0	NA	Lion	N	N	Y
997	997	2013-01-02	2012-12-26	2012	Mabale	lupote	497251	7951795	497214	7951787	2	goat	0	NA	Hyaena	Y	N	NA
998	998	2013-02-14	2012-12-28	2012	Tsholotsho	Siwela	553761	7877913	553786	7877941	1	goat	0	NA	Hyaena	N	N	NA
999	999	2013-01-03	2012-12-29	2012	Mabale	mabale	500518	7951357	500460	7951524	1	goat	1	cattle	Hyaena	Y	N	NA
1000	1000	2013-02-19	2012-12-31	2012	Tsholotsho	mtombeni	553605	7881048	553181	7880239	1	donkey	0	NA	Hyaena	N	N	N
1001	1001	2013-01-04	2013-01-04	2013	Mabale	dingani	488844	7952988	488844	7952988	2	goat	0	NA	Hyaena	Y	N	NA
1002	1002	2013-01-04	2013-01-04	2013	Mabale	dingani	488690	7953108	488690	7953108	2	goat	0	NA	Hyaena	Y	N	NA
1003	1003	2013-01-09	2013-01-05	2013	Mabale	mabale	509950	7946584	510033	7946126	2	goat	0	NA	Hyaena	Y	N	NA
1004	1004	2013-02-04	2013-01-05	2013	Tsholotsho	makeni	522522	7856807	520774	7855530	1	donkey	0	NA	Hyaena	N	N	N
1005	1005	2013-02-14	2013-01-06	2013	Tsholotsho	Siwela	553313	787811	552799	7878712	1	cattle	0	NA	Hyaena	N	N	NA
1006	1006	2013-01-09	2013-01-07	2013	Mabale	mabale	507418	7945358	505915	7944130	0	NA	1	cattle	Lion	N	D	NA
1007	1007	2013-01-09	2013-01-07	2013	Mabale	masikili	509950	7946584	510512	7945506	1	cattle	0	NA	Lion	N	N	NA
1008	1008	2013-01-11	2013-01-11	2013	Mabale	dingani	488849	7952989	488849	7952989	2	goat	0	NA	Hyaena	Y	N	NA
1009	1009	2013-02-08	2013-01-15	2013	Tsholotsho	Bemba	528413	7848609	529265	7848747	1	cattle	0	NA	Hyaena	N	N	NA
1010	1010	2013-02-04	2013-01-15	2013	Tsholotsho	makeni	522666	7856691	521029	7855072	1	donkey	0	NA	Hyaena	N	N	Y
1011	1011	2013-02-08	2013-01-21	2013	Tsholotsho	stambara	529066	7849256	528990	7851078	1	cattle	3	cattle	Hyaena	N	N	NA
1012	1012	2013-02-08	2013-01-22	2013	Tsholotsho	Bemba	529066	7849256	529479	7850210	1	cattle	0	NA	Hyaena	N	N	NA
1013	1013	2013-01-25	2013-01-24	2013	Mabale	mabale	506225	7945297	507063	7944207	0	NA	1	cattle	Lion	N	D	NA
1014	1014	2013-03-14	2013-01-25	2013	Tsholotsho	nganyana	548469	7882275	548500	7882240	1	goat	0	NA	Lion	Y	N	NA
1015	1015	2013-02-06	2013-02-05	2013	Tsholotsho	Manjelengwa	538679	7868932	536188	7865729	1	cattle	0	NA	Hyaena	N	N	NA
1016	1016	2013-02-12	2013-02-08	2013	Mabale	mabale	503265	7947775	503519	7947705	1	donkey	0	NA	Hyaena	N	N	N
1017	1017	2013-02-12	2013-02-11	2013	Mabale	mabale	504330	7947187	504163	7947449	1	donkey	0	NA	Hyaena	N	N	N
1018	1018	2013-02-13	2013-02-12	2013	Mabale	magoli	488444	7946304	491371	7946505	2	cattle	0	NA	Hyaena	N	N	NA
1019	1019	2013-02-14	2013-02-13	2013	Mabale	dingani	488525	7949806	489023	7949639	1	donkey	1	donkey	Hyaena	N	N	NA
1020	1020	2013-02-15	2013-02-14	2013	Mabale	mabale	509910	7946182	511854	7945293	0	NA	1	cattle	Lion	N	D	NA
1021	1021	2013-02-16	2013-02-15	2013	Mabale	mabale	506202	7945286	506458	7944054	1	cattle	0	NA	Lion	N	D	NA
1022	1022	2013-02-25	2013-02-18	2013	Mabale	mabale	503354	7947746	502100	7946291	1	cattle	0	NA	Lion	N	D	N
1023	1023	2013-02-14	2013-02-20	2013	Tsholotsho	Siwela	553313	7878110	555157	7879256	1	cattle	0	NA	Hyaena	N	N	Y
1024	1024	2013-03-05	2013-03-01	2013	Tsholotsho	gwenga	542966	7870360	542839	7872473	2	cattle	0	NA	Leopard	N	D	NA
1025	1025	2013-03-04	2013-03-05	2013	Tsholotsho	Vozheka	555085	7883684	557465	7882782	1	cattle	0	NA	Hyaena	N	N	NA
1026	1026	2013-03-14	2013-03-06	2013	Mabale	mabale	508369	7951857	511081	7954738	2	cattle	0	NA	Hyaena	N	N	NA
1027	1027	2013-03-08	2013-03-07	2013	Tsholotsho	Mtshayeli	535658	7865048	537098	7865010	1	donkey	0	NA	Hyaena	N	N	NA
1028	1028	2013-04-19	2013-03-10	2013	Tsholotsho	Bemba	528982	7849663	528888	7851351	2	cattle	0	NA	Hyaena	N	N	NA
1029	1029	2013-04-19	2013-03-13	2013	Tsholotsho	Bemba	528951	7851354	528947	7851357	1	cattle	0	NA	Hyaena	N	N	N
1030	1030	2013-08-12	2013-03-15	2013	Tsholotsho	vusani	532126	7850521	529369	7851987	0	NA	1	cattle	Hyaena	N	N	N
1031	1031	2013-03-18	2013-03-17	2013	Tsholotsho	Ngamo	550580	7883281	551170	7883707	1	cattle	0	NA	Hyaena	N	N	NA
1032	1032	2013-04-19	2013-03-17	2013	Tsholotsho	Bemba	528968	7850369	529164	7869141	1	cattle	2	cattle	Hyaena	N	N	NA
1033	1033	2013-08-12	2013-03-25	2013	Tsholotsho	vusani	532025	7850395	530081	7851573	1	cattle	0	NA	Hyaena	N	N	NA
1034	1034	2013-08-12	2013-03-25	2013	Tsholotsho	vusani	532665	7850988	531374	7851820	0	NA	1	cattle	Hyaena	N	N	NA
1035	1035	2013-08-12	2013-03-25	2013	Tsholotsho	vusani	532633	7851079	529616	7852432	1	cattle	0	NA	Hyaena	N	N	N
1036	1036	2013-04-03	2013-03-27	2013	Mabale	mabale	500877	7948344	498195	7947242	1	cattle	0	NA	Lion	N	D	Y
1037	1037	2013-04-19	2013-03-28	2013	Tsholotsho	Bemba	529002	7849384	528799	7849787	1	donkey	0	NA	Hyaena	N	N	NA
1038	1038	2013-03-30	2013-03-29	2013	Tsholotsho	Mtshayeli	535934	7864445	536853	7861751	1	cattle	2	cattle	Hyaena	N	N	NA
1039	1039	2013-04-03	2013-03-31	2013	Mabale	mabale	502933	7947776	503014	7944626	1	cattle	0	NA	Lion	N	N	NA
1040	1040	2013-08-12	2013-03-31	2013	Tsholotsho	vusani	532711	7851231	530041	7852699	1	cattle	1	cattle	Hyaena	N	N	NA
1041	1041	2013-04-11	2013-04-10	2013	Tsholotsho	ngamo	553671	7881086	549401	7885758	1	cattle	0	NA	Lion	N	N	NA
1042	1042	2013-04-11	2013-04-10	2013	Tsholotsho	ngamo	553611	7880987	549413	7885729	1	cattle	0	NA	Lion	N	N	NA
1043	1043	2013-04-11	2013-04-10	2013	Tsholotsho	ngamo	553642	7881106	549419	7885705	1	cattle	0	NA	Lion	N	N	N
1044	1044	2013-04-11	2013-04-11	2013	Tsholotsho	Vozheka	554597	7883849	555436	7885515	1	cattle	2	cattle	Lion	N	N	N
1045	1045	2013-04-16	2013-04-15	2013	Mabale	mabale	505564	7944875	505036	7944496	1	goat	0	NA	Lion	N	D	NA
1046	1046	2013-04-27	2013-04-26	2013	Tsholotsho	Mtshayeli	537099	7865011	532551	7862278	1	cattle	0	NA	Hyaena	N	N	NA
1047	1047	2013-04-28	2013-04-28	2013	Mabale	lupote	497374	7951872	497840	7949682	1	cattle	0	NA	Lion	N	D	N
1048	1048	2013-05-10	2013-05-09	2013	Mabale	lupote	493113	7954724	494404	7955408	1	cattle	0	NA	Lion	N	N	Y
1049	1049	2013-05-10	2013-05-09	2013	Mabale	lupote	493113	7954724	494369	7955446	1	cattle	0	NA	Lion	N	N	N
1050	1050	2013-05-13	2013-05-09	2013	Mabale	lupote	494066	7953730	494076	7954100	1	cattle	0	NA	Lion	N	N	NA
1051	1051	2013-05-13	2013-05-12	2013	Mabale	mabale	504437	7948125	504497	7948158	1	cattle	0	NA	Lion	Y	N	NA
1052	1052	2013-05-15	2013-05-14	2013	Mabale	gwenga	544177	7869995	544112	7869932	1	goat	0	NA	Hyaena	N	N	NA
1053	1053	2013-05-16	2013-05-14	2013	Mabale	gwenga	544101	7869927	544112	7869932	1	goat	0	NA	Hyaena	N	N	NA
1054	1054	2013-05-24	2013-05-17	2013	Tsholotsho	Vulashaba	539844	7869563	533983	7868859	1	donkey	0	NA	Hyaena	N	N	NA
1055	1055	2013-05-24	2013-05-17	2013	Tsholotsho	Vulashaba	539844	7869563	533983	7868859	1	donkey	0	NA	Hyaena	N	N	NA
1056	1056	2013-05-27	2013-05-19	2013	Mabale	Muphakati	494465	7959696	495225	7958368	1	cattle	0	NA	Lion	N	N	NA
1057	1057	2013-05-21	2013-05-20	2013	Mabale	Songwa	494856	7959457	495073	7958454	1	cattle	0	NA	Lion	N	N	NA
1058	1058	2013-05-23	2013-05-21	2013	Tsholotsho	ziga	549435	7875787	547737	7875803	1	donkey	0	NA	Hyaena	N	N	NA
1059	1059	2013-06-04	2013-06-03	2013	Mabale	Muphakati	494849	7961414	496041	7961699	1	cattle	1	cattle	Lion	N	N	NA
1060	1060	2013-06-05	2013-06-03	2013	Mabale	mambanje	478421	7949972	478444	7949967	1	cattle	0	NA	Leopard	Y	N	NA
1061	1061	2013-06-05	2013-06-03	2013	Mabale	mambanje	477525	7950322	477377	7950527	1	cattle	0	NA	Leopard	N	D	NA
1062	1062	2013-06-05	2013-06-03	2013	Mabale	mambanje	478486	7949272	478491	7949228	2	sheep	0	NA	Leopard	Y	N	NA
1063	1063	2013-06-05	2013-06-03	2013	Mabale	mambanje	478486	7949272	478491	7949228	0	NA	1	cattle	Lion	Y	N	NA
1064	1064	2013-08-10	2013-06-15	2013	Tsholotsho	sodaka	509375	7855200	509847	7862166	2	cattle	0	NA	Hyaena	N	N	NA
1065	1065	2013-08-10	2013-06-20	2013	Tsholotsho	sodaka	509545	7855122	508937	7857941	2	donkey	0	NA	Hyaena	N	N	NA
1066	1066	2013-08-10	2013-06-22	2013	Tsholotsho	simwen	512624	7854774	512529	7853875	1	cattle	0	NA	Hyaena	N	N	NA
1067	1067	2013-06-27	2013-06-25	2013	Mabale	lupote	496612	7951821	496899	7950859	1	cattle	0	NA	Lion	N	D	NA
1068	1068	2013-07-09	2013-06-26	2013	Tsholotsho	ngamo	550651	7883619	547477	7884719	2	cattle	0	NA	Lion	N	N	NA
1069	1069	2013-07-09	2013-06-26	2013	Tsholotsho	ngamo	550651	7883619	547397	7884763	1	cattle	0	NA	Lion	N	N	NA
1070	1070	2013-07-02	2013-06-30	2013	Mabale	Jwapi	490500	7951614	491029	7951016	1	donkey	0	NA	Hyaena	N	N	NA
1071	1071	2013-07-02	2013-07-01	2013	Mabale	lupote	498605	7951620	498592	7951630	2	goat	0	NA	Hyaena	Y	N	NA
1072	1072	2013-07-03	2013-07-04	2013	Mabale	mambanje	478637	7949626	478606	7949632	1	goat	0	NA	Leopard	Y	N	NA
1073	1073	2013-07-03	2013-07-04	2013	Mabale	mambanje	479857	7948250	479718	7948125	1	goat	0	NA	Leopard	N	N	NA
1074	1074	2013-08-10	2013-07-05	2013	Tsholotsho	manaleni	499608	7857538	497990	7859406	3	cattle	0	NA	Lion	N	N	NA
1075	1075	2013-07-11	2013-07-10	2013	Mabale	Muphakati	494969	7961552	496631	7962905	2	cattle	0	NA	Lion	N	N	NA
1076	1076	2013-07-11	2013-07-10	2013	Mabale	Muphakati	494969	7961552	496590	7962767	2	cattle	0	NA	Lion	N	N	NA
1077	1077	2013-07-15	2013-07-12	2013	Mabale	koba	529149	7863797	528021	7865720	1	cattle	0	NA	Leopard	N	N	NA
1078	1078	2013-07-13	2013-07-12	2013	Mabale	lupote	493644	7953398	493366	7953247	0	NA	3	cattle	Hyaena	N	N	NA
1079	1079	2013-08-10	2013-07-15	2013	Tsholotsho	zanqaweni	503262	7854126	504794	7855661	1	cattle	0	NA	Hyaena	N	N	NA
1080	1080	2013-08-15	2013-07-19	2013	Tsholotsho	ngamo	550922	7885033	547992	7886273	0	NA	1	cattle	Lion	N	D	NA
1081	1081	2013-07-23	2013-07-19	2013	Tsholotsho	zandile	549861	7878721	548706	7880612	1	cattle	0	NA	Hyaena	N	N	NA
1082	1082	2013-11-06	2013-07-19	2013	Tsholotsho	ngamo	550174	7883592	550943	7882127	1	cattle	3	cattle	Lion	N	N	NA
1083	1083	2013-07-23	2013-07-22	2013	Tsholotsho	ngamo	550540	7883349	548434	7884039	1	cattle	0	NA	Lion	N	N	NA
1084	1084	2013-08-10	2013-07-25	2013	Tsholotsho	sodaka	508700	7855122	506449	7857074	1	cattle	0	NA	Hyaena	N	N	NA
1085	1085	2013-08-10	2013-07-28	2013	Tsholotsho	sihazela	520460	7854392	517595	7857744	1	cattle	0	NA	Hyaena	N	N	NA
1086	1086	2013-08-10	2013-08-04	2013	Mabale	Jwapi	492866	7952874	492901	7952907	1	cattle	0	NA	Lion	Y	N	Y
1087	1087	2013-08-07	2013-08-05	2013	Tsholotsho	Mtshayeli	535270	7865128	531072	7867918	0	NA	1	cattle	Leopard	N	D	Y
1088	1088	2013-08-15	2013-08-13	2013	Tsholotsho	nganyana	547774	7881065	546762	7882542	1	cattle	1	cattle	Lion	N	N	NA
1089	1089	2013-08-16	2013-08-15	2013	Mabale	Dingani	489231	7950373	489223	7950431	1	cattle	0	NA	Lion	N	N	N
1090	1090	2013-09-01	2013-08-15	2013	Tsholotsho	ngamo	551319	7885349	548308	7888701	0	NA	1	cattle	Lion	N	D	NA
1091	1091	2013-11-03	2013-08-21	2013	Tsholotsho	dibutibu	572975	7885821	572322	7889661	1	cattle	0	NA	Hyaena	N	N	N
1092	1092	2013-11-03	2013-08-21	2013	Tsholotsho	dibutibu	572975	7885821	572322	7889661	1	cattle	0	NA	Hyaena	N	N	Y
1093	1093	2013-09-13	2013-08-29	2013	Tsholotsho	ngamo	551319	7885349	548847	7887901	1	cattle	1	cattle	Lion	N	N	NA
1094	1094	2013-09-02	2013-09-02	2013	Tsholotsho	Vozheka	554363	7883946	556425	7886337	1	cattle	0	NA	Lion	N	N	NA
1095	1095	2013-09-02	2013-09-02	2013	Tsholotsho	Vozheka	554363	7883946	556466	7886365	1	cattle	0	NA	Lion	N	N	NA
1096	1096	2013-09-02	2013-09-02	2013	Tsholotsho	Vozheka	554363	7883946	556474	7886365	1	cattle	0	NA	Lion	N	N	NA
1097	1097	2013-09-12	2013-09-07	2013	Tsholotsho	ngamo	550390	7884565	550594	7886945	1	cattle	0	NA	Lion	N	N	NA
1098	1098	2013-09-13	2013-09-12	2013	Tsholotsho	Vozheka	553010	7883713	554698	7882965	1	cattle	0	NA	Lion	N	N	Y
1099	1099	2013-09-17	2013-09-16	2013	Tsholotsho	gwenga	542098	7870240	540731	7869806	1	cattle	0	NA	Hyaena	N	D	NA
1100	1100	2013-09-20	2013-09-19	2013	Tsholotsho	ngamo	550516	7884450	547299	7885531	1	cattle	0	NA	Lion	N	N	NA
1101	1101	2013-09-20	2013-09-21	2013	Tsholotsho	Manjelengwa	538417	7868930	537203	7868350	1	cattle	0	NA	Hyaena	N	N	N
1102	1102	2014-01-10	2013-09-27	2013	Tsholotsho	ngamo	548833	7882278	547778	7884503	1	cattle	0	NA	Lion	N	N	NA
1103	1103	2013-11-06	2013-09-29	2013	Tsholotsho	ngamo	550174	7883592	547514	7885113	2	cattle	0	NA	Lion	N	N	N
1104	1104	2013-10-03	2013-09-30	2013	Mabale	masikili	505422	7945087	505366	7945163	1	goat	0	NA	Hyaena	Y	D	NA
1105	1105	2013-10-01	2013-09-30	2013	Mabale	magoli	488546	7946406	488548	7946398	0	NA	1	cattle	Lion	Y	N	Y
1106	1106	2013-10-01	2013-10-01	2013	Mabale	magoli	488004	7948240	488868	7947070	0	NA	1	cattle	Lion	N	D	NA
1107	1107	2013-10-04	2013-10-02	2013	Tsholotsho	ndodana	523913	7864451	524317	7861536	2	goat	1	cattle	Leopard	N	D	NA
1108	1108	2013-10-02	2013-10-02	2013	Tsholotsho	ndodana	525952	7864463	524317	7861536	3	goat	0	NA	Leopard	N	N	NA
1109	1109	2013-11-09	2013-10-05	2013	Tsholotsho	manguta	534947	7853027	539987	7852206	1	donkey	0	NA	Hyaena	N	N	N
1110	1110	2013-12-16	2013-10-05	2013	Tsholotsho	Mashula	539644	7861827	536411	7862881	1	cattle	0	NA	Hyaena	N	N	NA
1111	1111	2013-12-16	2013-10-05	2013	Tsholotsho	Mashula	539644	7861827	536411	7862881	1	donkey	0	NA	Hyaena	N	N	NA
1112	1112	2013-10-14	2013-10-10	2013	Mabale	magoli	487271	7945049	487047	7943595	1	cattle	3	cattle	Lion	N	D	N
1113	1113	2013-10-20	2013-10-19	2013	Tsholotsho	Manjelengwa	539393	7870175	540085	7871490	1	cattle	0	NA	Hyaena	N	N	NA
1114	1114	2013-10-27	2013-10-25	2013	Tsholotsho	elangeni	503130	7846798	501733	7848582	0	NA	1	cattle	Hyaena	N	N	Y
1115	1115	2013-11-09	2013-10-27	2013	Tsholotsho	elangeni	503419	7846240	501733	7848582	1	cattle	0	NA	Hyaena	N	N	NA
1116	1116	2013-11-03	2013-11-02	2013	Tsholotsho	nkiwana	552571	7883316	553420	7883440	1	cattle	0	NA	Hyaena	N	N	NA
1117	1117	2013-11-03	2013-11-03	2013	Mabale	magoli	488444	7946304	489704	7943599	2	cattle	0	NA	Lion	N	N	NA
1118	1118	2013-11-09	2013-11-03	2013	Tsholotsho	sihazela	520541	7854335	520241	7853215	1	cattle	0	NA	Hyaena	N	N	NA
1119	1119	2013-11-05	2013-11-05	2013	Mabale	magoli	487154	7946932	490505	7945944	2	cattle	0	NA	Lion	N	N	NA
1120	1120	2013-11-06	2013-11-05	2013	Tsholotsho	Manjelengwa	539221	7869027	535501	7867674	1	cattle	0	NA	Hyaena	N	N	NA
1121	1121	2013-11-08	2013-11-07	2013	Mabale	Dingani	488128	7948567	489976	7948744	1	cattle	0	NA	Lion	N	N	NA
1122	1122	2013-12-01	2013-11-17	2013	Tsholotsho	ngamo	550636	7885221	552787	7887544	2	cattle	0	NA	Lion	N	N	NA
1123	1123	2013-11-20	2013-11-19	2013	Tsholotsho	zandile	549183	7878719	547722	7878687	1	cattle	0	NA	Lion	N	N	N
1124	1124	2013-11-20	2013-11-19	2013	Tsholotsho	zandile	549183	7878981	547726	7878719	1	cattle	0	NA	Lion	N	N	NA
1125	1125	2013-11-19	2013-11-20	2013	Mabale	magoli	485239	7947193	484841	7944738	1	cattle	1	cattle	Lion	N	N	NA
1126	1126	2013-11-19	2013-11-20	2013	Mabale	magoli	485685	7947627	489160	7945700	1	cattle	0	NA	Lion	N	N	NA
1127	1127	2013-12-01	2013-11-27	2013	Tsholotsho	ngamo	550313	7884660	549730	7886786	1	cattle	0	NA	Lion	N	N	NA
1128	1128	2013-12-01	2013-11-29	2013	Mabale	Jwapi	491684	7951369	492390	7948424	3	cattle	0	NA	Hyaena	N	N	NA
1129	1129	2013-12-24	2013-12-03	2013	Tsholotsho	stambara	552027	7884248	552898	7887463	0	NA	1	cattle	Lion	N	N	NA
1130	1130	2013-12-24	2013-12-03	2013	Tsholotsho	stambara	552237	7883769	553879	7884747	2	cattle	0	NA	Lion	N	N	NA
1131	1131	2013-12-14	2013-12-06	2013	Tsholotsho	mlevu	544282	7869836	541943	7870253	1	donkey	0	NA	Hyaena	N	N	NA
1132	1132	2013-12-14	2013-12-11	2013	Tsholotsho	mlevu	545399	7869522	545002	7875085	1	cattle	0	NA	Lion	N	N	NA
1133	1133	2013-12-14	2013-12-11	2013	Tsholotsho	mlevu	545399	7869522	545000	7875111	1	cattle	0	NA	Lion	N	N	NA
1134	1134	2013-12-14	2013-12-12	2013	Tsholotsho	mlevu	545537	7869514	544989	7875163	1	cattle	0	NA	Lion	N	N	NA
1135	1135	2013-12-14	2013-12-12	2013	Tsholotsho	mlevu	545399	7869522	544978	7875134	1	cattle	0	NA	Lion	N	N	NA
1136	1136	2013-12-14	2013-12-12	2013	Tsholotsho	mlevu	545399	7869522	544937	7875171	1	cattle	0	NA	Lion	N	N	NA
1137	1137	2013-12-14	2013-12-13	2013	Tsholotsho	mlevu	545424	7869509	544959	7875160	1	cattle	0	NA	Lion	N	D	NA
1138	1138	2013-12-23	2013-12-16	2013	Tsholotsho	mlevu	545701	7869587	548997	7877758	1	donkey	0	NA	Hyaena	N	N	NA
1139	1139	2013-12-24	2013-12-18	2013	Tsholotsho	ngamo	550730	7884436	550303	7884645	0	NA	1	cattle	Lion	N	D	NA
1140	1140	2013-12-22	2013-12-19	2013	Tsholotsho	mangutana	536514	7855964	536486	7856157	1	cattle	0	NA	Lion	N	N	NA
1141	1141	2013-12-22	2013-12-19	2013	Tsholotsho	mangutana	536514	7855964	536459	7856137	1	cattle	0	NA	Lion	N	N	NA
1142	1142	2013-12-22	2013-12-19	2013	Tsholotsho	mangutana	536514	7855964	536471	7856019	1	goat	0	NA	Lion	N	N	NA
1143	1143	2013-12-22	2013-12-19	2013	Tsholotsho	mangutana	536514	7855964	536488	7856008	1	goat	0	NA	Lion	N	N	NA
1144	1144	2013-12-22	2013-12-20	2013	Tsholotsho	mangutana	536488	7856008	536493	7856161	1	dog	0	NA	Lion	N	N	NA
1145	1145	2013-12-22	2013-12-20	2013	Tsholotsho	mangutana	536466	7855759	537662	7856058	1	cattle	0	NA	Lion	N	N	NA
1146	1146	2013-12-22	2013-12-20	2013	Tsholotsho	Mangutana	536466	7855759	536788	7856174	1	cattle	2	cattle	Lion	N	N	NA
1147	1147	2014-01-09	2013-12-24	2013	Tsholotsho	Manguta	534627	7852975	534412	7852833	1	donkey	0	NA	Lion	N	N	N
1148	1148	2014-01-09	2013-12-24	2013	Tsholotsho	Manguta	534865	7852924	534488	7852882	1	donkey	0	NA	Lion	N	N	NA
1149	1149	2014-01-09	2013-12-24	2013	Tsholotsho	Manguta	534865	7852924	534882	7852980	0	NA	1	cattle	Lion	N	N	NA
1150	1150	2012-02-01	NA	2012	Mabale	Chimwaravillage5	535010	7932989	535038	7932986	1	cattle	0	NA	Lion	Y	N	NA
1151	1151	2012-02-01	NA	2012	Mabale	Chimwaravillage5	535010	7932989	535038	7932986	1	goat	0	NA	Lion	N	N	NA
1152	1152	2011-03-07	2011-03-01	2011	Mabale	NA	NA	NA	488478	7949609	2	goat	0	NA	Hyaena	Y	N	Y
1153	1153	2011-03-07	2011-03-02	2011	Mabale	NA	NA	NA	488478	7949609	2	goat	0	NA	Hyaena	Y	N	Y
1154	1154	2011-03-07	2011-03-03	2011	Mabale	NA	NA	NA	488478	7949609	2	goat	0	NA	Hyaena	Y	N	Y
1155	1155	2011-03-07	2011-01-01	2011	Mabale	NA	NA	NA	484036	7949162	1	goat	0	NA	Hyaena	Y	N	Y
1156	1156	2011-03-07	2011-02-24	2011	Mabale	NA	NA	NA	484002	7949122	2	goat	0	NA	Hyaena	N	N	N
1157	1157	2011-03-07	2011-02-21	2011	Mabale	NA	NA	NA	488743	7949678	1	goat	0	NA	Hyaena	Y	N	Y
1158	1158	2011-03-07	2011-03-05	2011	Mabale	NA	NA	NA	488377	7949607	1	goat	0	NA	Hyaena	Y	N	Y
1159	1159	2011-03-07	2011-03-05	2011	Mabale	NA	NA	NA	488377	7949607	1	goat	0	NA	Hyaena	Y	N	Y
1160	1160	2011-03-07	2011-03-01	2011	Mabale	NA	NA	NA	488426	7949774	0	NA	1	goat	Hyaena	Y	NA	Y
1161	1161	2011-03-07	2011-02-25	2011	Mabale	NA	NA	NA	488611	7949746	2	goat	0	NA	Hyaena	Y	N	N
1162	1162	2011-03-14	2011-02-25	2011	Mabale	NA	NA	NA	481674	7954111	2	goat	0	NA	Hyaena	Y	NA	Y
1163	1163	2011-03-17	2011-02-01	2011	Mabale	NA	NA	NA	479562	7949302	1	goat	0	NA	Hyaena	Y	N	Y
1164	1164	2011-03-17	2011-02-01	2011	Mabale	NA	NA	NA	479551	7949339	1	goat	0	NA	Hyaena	Y	N	Y
1165	1165	2011-03-17	2011-02-19	2011	Mabale	NA	NA	NA	480760	7944938	1	cattle	0	NA	Hyaena	N	N	N
1166	1166	2011-03-17	2011-03-15	2011	Mabale	NA	NA	NA	477961	7946811	3	sheep	0	NA	Hyaena	N	N	Y
1167	1167	2011-03-17	2011-03-15	2011	Mabale	NA	NA	NA	477961	7946811	17	goat	0	NA	Hyaena	N	N	Y
1168	1168	2011-04-09	2011-04-08	2011	Mabale	NA	NA	NA	488934	7947314	0	NA	1	cattle	Hyaena	N	N	Y
1169	1169	2011-04-26	2011-04-09	2011	Mabale	NA	NA	NA	484032	7949166	1	goat	0	NA	Hyaena	Y	N	Y
1170	1170	2011-06-15	2011-04-13	2011	Mabale	NA	NA	NA	477967	7951140	5	goat	0	NA	Hyaena	Y	N	Y
1171	1171	2011-04-26	2011-04-09	2011	Mabale	NA	NA	NA	484168	7949061	1	goat	0	NA	Hyaena	Y	N	N
1172	1172	2011-05-31	2011-05-29	2011	Mabale	NA	NA	NA	487952	7950510	2	goat	0	NA	Hyaena	Y	N	Y
1173	1173	2011-06-15	2011-06-04	2011	Mabale	NA	NA	NA	479128	7949118	0	NA	1	goat	Hyaena	Y	N	Y
1174	1174	2011-06-23	2011-06-05	2011	Mabale	NA	NA	NA	483172	7954510	3	goat	0	NA	Hyaena	Y	N	Y
1175	1175	2011-06-25	2011-06-10	2011	Mabale	NA	NA	NA	484012	7954530	0	NA	1	goat	Hyaena	Y	N	Y
1176	1176	2011-06-26	2011-06-01	2011	Mabale	NA	NA	NA	483376	7954391	0	NA	1	goat	Hyaena	Y	N	Y
1177	1177	2011-06-25	2011-06-23	2011	Mabale	NA	NA	NA	487916	7948251	8	goat	0	NA	Hyaena	Y	N	Y
1178	1178	2011-06-26	2011-06-25	2011	Mabale	NA	NA	NA	487767	7948399	1	goat	0	NA	Hyaena	Y	N	N
1179	1179	2011-06-30	2011-05-01	2011	Mabale	NA	NA	NA	484002	7949122	1	goat	0	NA	Hyaena	Y	N	Y
1180	1180	2011-07-01	2011-06-01	2011	Mabale	NA	NA	NA	484862	7948738	1	goat	0	NA	Hyaena	Y	N	Y
1181	1181	2011-07-01	2011-07-01	2011	Mabale	NA	NA	NA	484862	7948738	1	goat	0	NA	Hyaena	Y	N	N
1182	1182	2011-07-01	2011-06-11	2011	Mabale	NA	NA	NA	482311	7948612	2	goatandsheep	0	NA	Hyaena	Y	N	Y
1183	1183	2011-07-01	2011-06-12	2011	Mabale	NA	NA	NA	482311	7948612	4	goat	0	NA	Hyaena	Y	N	Y
1184	1184	2011-07-01	2011-06-13	2011	Mabale	NA	NA	NA	482311	7948612	2	goatandsheep	0	NA	Hyaena	Y	N	Y
1185	1185	2011-06-30	2011-06-25	2011	Mabale	NA	NA	NA	485352	7949880	0	NA	1	goat	Hyaena	Y	N	Y
1186	1186	2011-06-30	2011-06-29	2011	Mabale	NA	NA	NA	484366	7949341	0	NA	1	goatandsheep	Hyaena	Y	N	Y
1187	1187	2011-07-05	2011-07-05	2011	Mabale	NA	NA	NA	488018	7948532	1	goat	0	NA	Hyaena	Y	N	Y
1188	1188	2011-07-21	2011-07-21	2011	Mabale	NA	NA	NA	486525	7948272	2	goat	0	NA	Hyaena	Y	N	Y
1189	1189	2011-07-27	2011-07-23	2011	Mabale	NA	NA	NA	482857	7952375	1	cattle	0	NA	Hyaena	Y	N	Y
1190	1190	2011-03-08	2011-08-02	2011	Mabale	NA	NA	NA	NA	NA	1	goat	0	NA	Hyaena	Y	N	N
1191	1191	2011-04-08	2011-04-08	2011	Mabale	NA	NA	NA	NA	NA	1	cattle	0	NA	Hyaena	N	N	Y
1192	1192	2011-04-08	2011-07-24	2011	Mabale	NA	NA	NA	NA	NA	6	goatandsheep	0	NA	Hyaena	Y	N	Y
1193	1193	NA	NA	2009	Mabale	Lupote	497377	7953530	497382	7953557	NA	goat	NA	NA	Hyaena	NA	NA	NA
1194	1194	NA	NA	2010	Mabale	Lupote	497443	7952444	497419	7952437	NA	goat	NA	NA	Hyaena	NA	NA	NA
1195	1195	NA	NA	2009	Mabale	Lupote	497214	7951764	NA	NA	NA	cattle	NA	NA	Hyaena	NA	NA	NA
1196	1196	NA	NA	2009	Mabale	Jwapi	493443	7951320	NA	NA	NA	cattle	NA	NA	Hyaena	NA	NA	NA
1197	1197	NA	NA	2009	Mabale	Jwapi	493491	7952819	NA	NA	NA	cattle	NA	NA	Hyaena	NA	NA	NA
1198	1198	NA	NA	2009	Mabale	Magoli	488005	7948236	NA	NA	NA	cattle	NA	NA	Hyaena	NA	NA	NA
1199	1199	NA	NA	2010	Mabale	Magoli	486488	7947374	486488	7947374	NA	goat	NA	NA	Hyaena	NA	NA	NA
1200	1200	NA	NA	2010	Mabale	Chezhou	482364	7947459	482363	7947459	NA	goat	NA	NA	Hyaena	NA	NA	NA
1201	1201	NA	NA	NA	Mabale	Makwandara	483059	7954969	NA	NA	NA	goat	NA	NA	Hyaena	NA	NA	NA
1202	1202	NA	NA	2010	Mabale	Makwandara	483687	7954272	483687	7954272	NA	goat	NA	NA	Hyaena	NA	NA	NA
1203	1203	NA	NA	2010	Mabale	Makwandara	481597	7954228	481597	7954228	NA	goat	NA	NA	Hyaena	NA	NA	NA
1204	1204	NA	NA	2009	Mabale	Nabushome	507016	7949232	507039	7949248	NA	goat	NA	NA	Hyaena	NA	NA	NA
1205	1205	NA	NA	2009	Mabale	Simukulule	503914	7947105	NA	NA	NA	cattle	NA	NA	Hyaena	NA	NA	NA
1206	1206	NA	NA	2009	Mabale	Simukulule	504228	7946912	504042	7948043	NA	donkey	NA	NA	Hyaena	NA	NA	NA
1207	1207	NA	NA	2009	Mabale	Simukulule	503950	7948800	503952	7948807	NA	goat	NA	NA	Hyaena	NA	NA	NA
1208	1208	NA	NA	2009	Mabale	Simukulule	503307	7947551	503660	7947767	NA	donkey	NA	NA	Hyaena	NA	NA	NA
1209	1209	NA	NA	2009	Mabale	Simukulule	502651	7948801	502690	7949173	NA	goat	NA	NA	Hyaena	NA	NA	NA
1210	1210	NA	NA	2009	Mabale	Ndajila	505085	7946729	NA	NA	NA	donkey	NA	NA	Hyaena	NA	NA	NA
1211	1211	NA	NA	2009	Mabale	Masikili	510510	7947415	510093	7947512	NA	donkey	NA	NA	Hyaena	NA	NA	NA
1212	1212	NA	NA	2009	Mabale	Dopota	500143	7948683	500149	7948704	NA	goat	NA	NA	Hyaena	NA	NA	NA
1213	1213	NA	NA	2009	Mabale	Sianyanga	503183	7954663	NA	NA	NA	cattle	NA	NA	Hyaena	NA	NA	NA
1214	1214	NA	NA	2009	Mabale	Sianyanga	503866	7953970	NA	NA	NA	cattle	NA	NA	Hyaena	NA	NA	NA
1215	1215	NA	NA	2009	Mabale	Sianyanga	502076	7953945	NA	NA	NA	donkey	NA	NA	Hyaena	NA	NA	NA
1216	1216	NA	NA	2010	Mabale	Lupote	497443	7952444	497419	7952437	NA	goat	NA	NA	Hyaena	NA	NA	NA
1217	1217	NA	NA	2009	Mabale	Jwapi	495121	7952252	NA	NA	NA	cattle	NA	NA	Hyaena	NA	NA	NA
1218	1218	NA	NA	2009	Mabale	Jwapi	493443	7951320	NA	NA	NA	goat	NA	NA	Hyaena	NA	NA	NA
1219	1219	NA	NA	2009	Mabale	Magoli	486488	7947374	486488	7947374	NA	goat	NA	NA	Hyaena	NA	NA	NA
1220	1220	NA	NA	2010	Mabale	Makwandara	483687	7954272	NA	NA	NA	sheep	NA	NA	Hyaena	NA	NA	NA
1221	1221	NA	NA	2009	Mabale	Makwandara	481597	7954228	NA	NA	NA	cattle	NA	NA	Hyaena	NA	NA	NA
1222	1222	NA	NA	2009	Mabale	Nabushome	507016	7949232	507039	7949248	NA	goat	NA	NA	Hyaena	NA	NA	NA
1223	1223	NA	NA	2009	Mabale	Simukulule	503307	7947551	503660	7947767	NA	donkey	NA	NA	Hyaena	NA	NA	NA
1224	1224	NA	NA	2009	Mabale	Dopota	500143	7948683	500149	7948704	NA	goat	NA	NA	Hyaena	NA	NA	NA
1225	1225	NA	NA	2009	Mabale	Sianyanga	503183	7954663	NA	NA	NA	cattle	NA	NA	Hyaena	NA	NA	NA
1226	1226	NA	NA	2010	Mabale	Lupote	497443	7952444	497419	7952437	NA	goat	NA	NA	Hyaena	NA	NA	NA
1227	1227	NA	NA	2009	Mabale	Simukulule	503307	7947551	503410	7947638	NA	goat	NA	NA	Hyaena	NA	NA	NA
1228	1228	NA	NA	2009	Mabale	Sianyanga	503183	7954663	NA	NA	NA	cattle	NA	NA	Hyaena	NA	NA	NA
1229	1229	NA	NA	2009	Mabale	Nabushome	507016	7949232	507011	7949254	NA	pig	NA	NA	Hyaena	NA	NA	NA
1230	1230	NA	NA	2009	Mabale	Simukulule	503307	7947551	503836	7947776	NA	donkey	NA	NA	Hyaena	NA	NA	NA
12271	1231	14.07.2011	01.12.2009	2009	Mvuthu_ShaMabalea	Mondevilage	378385	8007253	380574	8006911	1	cattle	0	NA	Lion	N	N	N
12281	1232	15.07.2011	15.11.2009	2009	Mvuthu_ShaMabalea	Mondevilage	377567	8007281	376244	8011096	1	cattle	0	NA	Hyaena	N	N	N
12291	1233	18.07.2011	01.06.2009	2009	Mvuthu_ShaMabalea	Sikandakubivillage5	402451	7994844	403466	7994179	2	cattle	2	cattle	Lion	N	N	Y
12301	1234	15.07.2011	01.08.2009	2009	Mvuthu_ShaMabalea	Mondevilage	379102	8007867	373544	8006984	1	donkey	0	NA	Lion	N	N	N
1231	1235	18.07.2011	15.01.2009	2009	Mvuthu_ShaMabalea	Sikandakubivillage5	402451	7994844	403587	7994060	1	donkey	0	NA	Hyaena	N	N	N
1232	1236	12.08.2011	15.02.2009	2009	Mvuthu_ShaMabalea	Dibutibuvillage	384993	8007465	384993	8007465	1	donkey	0	NA	Hyaena	N	N	Y
1233	1237	12.08.2011	15.11.2009	2009	Mvuthu_ShaMabalea	Dibutibuvillage	384993	8007465	384442	8007186	1	donkey	0	NA	Hyaena	N	N	Y
1234	1238	12.08.2011	15.11.2009	2009	Mvuthu_ShaMabalea	Dibutibuvillage	384993	8007465	384712	8007034	1	donkey	0	NA	Hyaena	N	N	Y
1235	1239	21.08.2011	15.11.2009	2009	Mvuthu_ShaMabalea	Dibutibuvillage	386332	8007918	384033	8010347	1	cattle	0	NA	Hyaena	N	N	N
1236	1240	30.08.2011	01.05.2009	2009	Mvuthu_ShaMabalea	Sizinda03village	377520	8005676	377502	8005685	1	sheep	0	NA	Leopard	Y	N	N
1237	1241	04.08.2011	01.07.2009	2009	Mvuthu_ShaMabalea	ChisumaNo01village	389620	8007772	389656	8007156	1	cattle	0	NA	Hyaena	N	N	N
1238	1242	31.08.2011	02.06.2009	2009	Mvuthu_ShaMabalea	ChidobeNo02village	382106	8003681	378539	8003606	2	cattle	0	NA	Hyaena	N	D	Y
1239	1243	25.11.2011	15.03.2009	2009	Mvuthu_ShaMabalea	SidobeNo01village	383135	8004045	384041	8005080	1	cattle	0	NA	Hyaena	N	N	N
1240	1244	25.11.2011	30.06.2009	2009	Mvuthu_ShaMabalea	SidobeNo01village	382984	8004008	383019	8003850	3	cattle	0	NA	Hyaena	N	N	N
1241	1245	09.12.2011	15.03.2009	2009	Mvuthu_ShaMabalea	SidobeNo05village	384413	8002834	385987	8004616	10	goat	0	NA	Hyaena	N	N	N
1242	1246	09.12.2011	01.01.2009	2009	Mvuthu_ShaMabalea	SidobeNo05village	384413	8002834	386029	8004167	3	cattle	1	cattle	Hyaena	N	N	Y
1243	1247	09.12.2011	15.07.2009	2009	Mvuthu_ShaMabalea	SidobeNo05village	384397	8002787	384101	8003391	2	donkey	1	donkey	Hyaena	N	N	Y
1244	1248	09.12.2011	30.11.2009	2009	Mvuthu_ShaMabalea	SidobeNo05village	384397	8002787	384807	8003909	1	cattle	1	cattle	Hyaena	N	N	Y
1245	1249	11.01.2012	15.04.2009	2009	Mvuthu_ShaMabalea	BH33Kachechetevillage	384894	8001092	384921	8001025	3	donkey	0	NA	Lion	Y	N	Y
1246	1250	13.01.2012	15.09.2009	2009	Mvuthu_ShaMabalea	BH36Kachechetevillage	387795	8001519	386652	8000672	1	donkey	0	NA	Hyaena	N	N	Y
1247	1251	13.01.2012	15.09.2009	2009	Mvuthu_ShaMabalea	BH36Kachechetevillage	387795	8001519	386921	8000887	1	donkey	0	NA	Hyaena	N	N	Y
1248	1252	13.09.2012	15.09.2009	2009	Mvuthu_ShaMabalea	BH36Kachechetevillage	387795	8001519	386777	8000740	1	donkey	0	NA	Hyaena	N	N	Y
1249	1253	16.02.2012	15.09.2009	2009	Mvuthu_ShaMabalea	BH28Hlangananivillage	384588	7997436	384644	7997702	1	donkey	0	NA	Lion	N	N	N
1250	1254	18.02.2012	15.06.2009	2009	Mvuthu_ShaMabalea	BH28Hlangananivillage	383887	7997555	383000	7997999	1	donkey	0	NA	Hyaena	N	N	N
1251	1255	18.02.2012	15.11.2009	2009	Mvuthu_ShaMabalea	BH28Hlangananivillage	383739	7997405	384589	7999355	1	cattle	0	NA	Lion	N	N	N
1252	1256	18.02.2012	15.06.2009	2009	Mvuthu_ShaMabalea	BH28Hlangananivillage	383768	7997308	383805	7996985	2	donkey	0	NA	Lion	N	N	Y
1253	1257	22.02.2012	15.07.2009	2009	Mvuthu_ShaMabalea	BH28Hlangananivillage	383145	7997738	383988	7997741	6	pig	0	NA	Lion	N	N	N
1254	1258	23.02.2012	01.11.2009	2009	Mvuthu_ShaMabalea	BH27Mvuthuvillage	385294	7996795	384954	7996939	1	cattle	0	NA	Lion	N	N	Y
1255	1259	23.02.2012	15.03.2009	2009	Mvuthu_ShaMabalea	BH27Mvuthuvillage	385294	7996795	NA	NA	1	cattle	0	NA	Lion	N	N	Y
1256	1260	23.07.2011	15.11.2010	2010	Mvuthu_ShaMabalea	Sizindavillage	381147	8006514	380663	8005907	1	donkey	0	NA	Hyaena	N	N	N
1257	1261	23.07.2011	01.11.2010	2010	Mvuthu_ShaMabalea	Sizindavillage	381147	8006514	379688	8005296	1	donkey	0	NA	Hyaena	N	N	Y
1258	1262	23.07.2011	10.11.2010	2010	Mvuthu_ShaMabalea	Sizindavillage	381147	8006514	380460	8005696	1	donkey	0	NA	Hyaena	N	N	Y
1259	1263	21.07.2011	15.11.2010	2010	Mvuthu_ShaMabalea	Sizindavillage	382031	8007346	382370	8006731	1	donkey	0	NA	Hyaena	N	N	Y
1260	1264	21.07.2011	15.03.2010	2010	Mvuthu_ShaMabalea	Sizindavillage	382031	8007346	382370	8006731	1	donkey	0	NA	Hyaena	N	N	Y
1261	1265	21.07.2011	15.03.2010	2010	Mvuthu_ShaMabalea	Sizindavillage	382031	8007346	382370	8006731	1	donkey	0	NA	Hyaena	N	N	Y
1262	1266	21.07.2011	01.03.2010	2010	Mvuthu_ShaMabalea	Sizindavillage	382031	8007346	384243	8007925	5	donkey	0	NA	Hyaena	N	N	N
1263	1267	21.07.2011	15.03.2010	2010	Mvuthu_ShaMabalea	Sizindavillage	382031	8007346	381991	8007281	1	donkey	0	NA	Hyaena	N	N	N
1264	1268	01.08.2010	01.10.2010	2010	Mvuthu_ShaMabalea	BH13village	400937	7998040	400022	7999030	2	donkey	0	NA	Lion	N	N	Y
1265	1269	01.08.2010	16.06.2010	2010	Mvuthu_ShaMabalea	Chikandakubimitimitemavillage3	399053	7994141	399133	7994037	2	cattle	0	NA	Lion	N	N	Y
1266	1270	02.08.2011	01.01.2010	2010	Mvuthu_ShaMabalea	Sizindavillage	383763	8007937	383460	8007703	2	donkey	0	NA	Hyaena	N	N	N
1267	1271	03.08.2011	30.02.2010	2010	Mvuthu_ShaMabalea	Sizindavillage	382468	8008677	382264	8008739	1	cattle	0	NA	Hyaena	Y	N	N
1268	1272	04.08.2011	15.12.2010	2010	Mvuthu_ShaMabalea	ChisumaNo02villge	388365	8006623	388737	8004993	1	cattle	0	NA	Hyaena	N	N	Y
1269	1273	04.08.2011	30.10.2010	2010	Mvuthu_ShaMabalea	ChisumaNo02villge	388889	8006233	388737	8004993	1	donkey	0	NA	Hyaena	N	N	Y
1270	1274	05.08.2011	15.07.2010	2010	Mvuthu_ShaMabalea	ChisumaNo01Avillage	388857	8007857	389554	8007367	2	donkey	0	NA	Hyaena	N	N	N
1271	1275	05.08.2011	30.07.2010	2010	Mvuthu_ShaMabalea	ChisumaNo02village	389448	8006236	389109	8005798	1	donkey	0	NA	Hyaena	N	N	Y
1272	1276	12.08.2011	03.08.2010	2010	Mvuthu_ShaMabalea	Dibutibuvillage	384407	8008930	384661	8008308	1	donkey	0	NA	Hyaena	N	N	N
1273	1277	18.08.2011	01.11.2010	2010	Mvuthu_ShaMabalea	ChisumaNo01Avillage	388484	8008393	387832	8008152	2	donkey	0	NA	Hyaena	N	N	Y
1274	1278	18.08.2011	15.09.2010	2010	Mvuthu_ShaMabalea	ChisumaNo01Avillage	388484	8008393	388449	8008403	1	donkey	0	NA	Hyaena	N	N	Y
1275	1279	04.08.2011	15.05.2010	2010	Mvuthu_ShaMabalea	Dibutibuvillage	385438	8007703	385686	8007521	7	goat	0	NA	Lion	N	N	Y
1276	1280	21.08.2011	30.04.2010	2010	Mvuthu_ShaMabalea	Dibutibuvillage	385387	8007682	385386	8007756	1	cattle	0	NA	Lion	N	N	Y
1277	1281	15.08.2011	15.05.2010	2010	Mvuthu_ShaMabalea	ChisumaNo02villge	388686	8006653	388703	8005761	1	cattle	0	NA	Hyaena	N	N	N
1278	1282	05.08.2011	30.11.2010	2010	Mvuthu_ShaMabalea	ChisumaNo01Avillage	388824	8008207	389045	8008411	1	cattle	0	NA	Hyaena	N	N	N
1279	1283	05.08.2011	01.09.2010	2010	Mvuthu_ShaMabalea	ChisumaNo02village	389286	8006708	388287	8006278	1	donkey	0	NA	Hyaena	N	N	Y
1280	1284	18.08.2011	01.08.2010	2010	Mvuthu_ShaMabalea	ChisumaNo01Bvillage	389485	8007753	389309	8008024	1	cattle	0	NA	Hyaena	N	N	Y
1281	1285	18.08.2011	30.11.2010	2010	Mvuthu_ShaMabalea	ChisumaNo01Bvillage	390063	8008286	390085	8008700	1	cattle	0	NA	Lion	N	N	Y
1282	1286	18.08.2011	30.11.2010	2010	Mvuthu_ShaMabalea	ChisumaNo01Bvillage	390063	8008286	390028	8008300	1	cattle	0	NA	Lion	Y	N	N
1283	1287	05.08.2011	15.03.2010	2010	Mvuthu_ShaMabalea	ChisumaNo02village	389286	8006708	388287	8006278	1	donkey	0	NA	Hyaena	N	N	Y
1284	1288	12.08.2011	15.08.2010	2010	Mvuthu_ShaMabalea	Dibutibuvillage	385387	8007682	385145	8007424	1	cattle	0	NA	Lion	Y	N	N
1285	1289	04.08.2011	01.09.2010	2010	Mvuthu_ShaMabalea	ChisumaNo02village	388451	8006797	387137	8007686	1	donkey	1	donkey	Hyaena	N	N	Y
1286	1290	30.08.2011	01.05.2010	2010	Mvuthu_ShaMabalea	Sizinda03village	378072	8005983	378056	8005947	1	cattle	0	NA	Lion	Y	N	N
1287	1291	01.09.2011	15.09.2010	2010	Mvuthu_ShaMabalea	ChidobeNo02village	381574	8004084	381535	8004066	2	cattleandgoat	0	NA	Lion	Y	N	N
1288	1292	31.08.2011	01.03.2010	2010	Mvuthu_ShaMabalea	SidobeNo02village	382106	8003681	378626	8003752	1	cattle	0	NA	Lion	N	N	Y
1289	1293	01.09.2011	15.11.2010	2010	Mvuthu_ShaMabalea	SidobeNo02village	381667	8003860	381571	8004039	1	goat	0	NA	Hyaena	N	N	N
1290	1294	29.10.2011	15.03.2010	2010	Mvuthu_ShaMabalea	SidobeNo03village	381081	8003762	382149	8002107	1	cattle	0	NA	Lion	N	N	N
1291	1295	25.11.2011	15.03.2010	2010	Mvuthu_ShaMabalea	SidobeNo01village	382984	8004008	383769	8005798	2	cattle	0	NA	Lion	N	D	N
1292	1296	25.11.2011	15.03.2010	2010	Mvuthu_ShaMabalea	SidobeNo01village	382984	8004008	383768	8005945	1	cattle	0	NA	Lion	N	D	Y
1293	1297	08.12.2011	30.11.2010	2010	Mvuthu_ShaMabalea	SidobeNo05village	382880	8001864	382912	8001922	1	cattle	0	NA	Lion	N	D	Y
1294	1298	08.12.2011	30.11.2010	2010	Mvuthu_ShaMabalea	SidobeNo05village	382880	8001864	382912	8001922	2	pig	0	NA	Lion	Y	N	N
1295	1299	08.12.2011	30.11.2010	2010	Mvuthu_ShaMabalea	SidobeNo05village	382880	8001864	382912	8001922	3	goat	0	NA	Lion	Y	N	N
1296	1300	09.12.2011	15.02.2010	2010	Mvuthu_ShaMabalea	SidobeNo05village	384413	8002834	384540	8003143	2	donkey	0	NA	Hyaena	N	N	Y
1297	1301	09.12.2011	15.06.2010	2010	Mvuthu_ShaMabalea	SidobeNo05village	384397	8002787	385742	8001923	1	cattle	0	NA	Hyaena	N	N	N
1298	1302	09.12.2011	01.03.2010	2010	Mvuthu_ShaMabalea	SidobeNo05village	384397	8002787	385987	8004616	1	donkey	0	NA	Hyaena	N	N	N
1299	1303	13.01.2012	15.05.2010	2010	Mvuthu_ShaMabalea	BH36Kachechetevillage	387795	8001519	387339	8000774	1	donkey	0	NA	Hyaena	N	N	Y
1300	1304	18.01.2011	15.03.2010	2010	Mvuthu_ShaMabalea	LupinyuJabulanivillage	379611	7997671	379614	7997661	1	cattle	0	NA	Lion	N	D	Y
1301	1305	19.01.2012	30.07.2010	2010	Mvuthu_ShaMabalea	BH114Lupinyuvillage	380440	7998252	380461	7998289	2	cattle	0	NA	Lion	N	D	Y
1302	1306	16.02.2012	15.08.2010	2010	Mvuthu_ShaMabalea	BH28Hlangananivillage	384588	7997436	384470	7997029	2	cattle	0	NA	Lion	N	N	N
1303	1307	16.02.2012	30.08.2010	2010	Mvuthu_ShaMabalea	BH28Hlangananivillage	384588	7997436	384435	7999279	2	donkey	0	NA	Lion	N	N	Y
1304	1308	22.02.2012	15.06.2010	2010	Mvuthu_ShaMabalea	BH27Mvuthuvillage	385522	7997127	385932	7999968	1	cattle	0	NA	Lion	N	D	Y
1305	1309	22.02.2012	01.06.2010	2010	Mvuthu_ShaMabalea	BH27Mvuthuvillage	385522	7997127	385932	7999968	1	cattle	0	NA	Lion	N	D	Y
1306	1310	23.02.2012	15.11.2010	2010	Mvuthu_ShaMabalea	BH27Mvuthuvillage	385294	7996795	385720	7999174	1	cattle	0	NA	Lion	N	N	Y
1307	1311	23.02.2012	15.11.2010	2010	Mvuthu_ShaMabalea	BH27Mvuthuvillage	385294	7996795	385720	7999174	1	cattle	0	NA	Lion	N	N	Y
1308	1312	24.02.2012	01.06.2010	2010	Mvuthu_ShaMabalea	BH27Hlangananivillage	384949	7997374	385103	7998917	1	cattle	0	NA	Lion	N	N	Y
1309	1313	03.93.2012	30.06.2010	2010	Mvuthu_ShaMabalea	BH10Mpumelelovillage	388652	7996217	388184	7995149	1	cattle	0	NA	Lion	N	D	Y
1310	1314	03.03.2012	30.04.2010	2010	Mvuthu_ShaMabalea	BH10Mpumelelovillage	388652	7996217	388594	7996243	5	cattle	0	NA	Lion	Y	N	Y
1311	1315	30.03.2012	15.10.2010	2010	Mvuthu_ShaMabalea	BH25Mpumelelovillage	390558	7997159	390601	7997161	1	donkey	0	NA	Lion	N	N	Y
1312	1316	30.03.2012	15.10.2010	2010	Mvuthu_ShaMabalea	BH25Mpumelelovillage	390558	7997159	390001	7998228	1	cattle	0	NA	Lion	N	D	N
1313	1317	30.03.2012	01.10.2010	2010	Mvuthu_ShaMabalea	BH25Mpumelelovillage	390558	7997159	389513	7995151	1	cattle	0	NA	Lion	N	D	N
1314	1318	31.03.2012	15.07.2010	2010	Mvuthu_ShaMabalea	BH25Mpumelelovillage	389806	7996726	389495	7995230	1	cattle	0	NA	Lion	N	N	Y
1315	1319	05.04.2012	15.01.2010	2010	Mvuthu_ShaMabalea	BH08Ndlovuvillage	395247	7998945	395234	7999024	2	donkey	0	NA	Lion	N	N	Y
1316	1320	13.04.2012	30.04.2010	2010	Mvuthu_ShaMabalea	BH07Chewumbavillage	398497	8000517	400490	8000803	1	donkey	0	NA	Hyaena	N	N	N
1317	1321	13.04.2012	15.10.2010	2010	Mvuthu_ShaMabalea	BH07Chewumbavillage	398402	8000163	399387	7999216	1	cattle	0	NA	Lion	N	N	N
1318	1322	13.04.2012	30.12.2010	2010	Mvuthu_ShaMabalea	BH07Chewumbavillage	398376	8000316	398146	7999791	1	donkey	0	NA	Hyaena	N	N	N
1319	1323	13.04.2012	15.04.2010	2010	Mvuthu_ShaMabalea	BH07Chewumbavillage	398497	8000517	398806	8000920	1	donkey	0	NA	Hyaena	N	N	Y
1320	1324	13.04.2012	15.06.2010	2010	Mvuthu_ShaMabalea	BH07Chewumbavillage	399105	8000479	399387	7999210	1	donkey	0	NA	Lion	N	N	Y
1321	1325	19.03.2012	15.05.2010	2010	Mvuthu_ShaMabalea	BH12Chewumbavillage	401687	8000062	401355	7999522	1	donkey	0	NA	Hyaena	N	N	Y
1322	1326	21.04.2012	01.06.2010	2010	Mvuthu_ShaMabalea	BH06Chewumbavillage	401304	8000360	400583	7999273	1	cattle	0	NA	Lion	N	N	N
1323	1327	21.04.2012	30.09.2010	2010	Mvuthu_ShaMabalea	BH06Chewumbavillage	401370	8000848	401489	8000684	1	donkey	0	NA	Hyaena	N	N	Y
1324	1328	21.04.2012	15.08.2010	2010	Mvuthu_ShaMabalea	BH06Chewumbavillage	401304	8000360	401238	8000825	1	cattle	0	NA	Hyaena	N	N	N
1325	1329	21.04.2012	15.08.2010	2010	Mvuthu_ShaMabalea	BH06Chewumbavillage	401370	8000848	401488	8000689	1	donkey	0	NA	Hyaena	Y	N	Y
1326	1330	03.05.2012	01.12.2010	2010	Mvuthu_ShaMabalea	Chikandakubimitimitemavillage3	402316	7994842	404331	7989654	6	cattle	0	NA	Lion	N	D	Y
1327	1331	03.05.2012	13.08.2010	2010	Mvuthu_ShaMabalea	Chikandakubimitimitemavillage3	402226	7994229	402234	7994262	1	cattle	0	NA	Lion	Y	N	Y
1328	1332	03.05.2012	13.08.2010	2010	Mvuthu_ShaMabalea	Chikandakubimitimitemavillage3	402159	7994321	402155	7994299	1	pig	0	NA	Lion	Y	N	N
1329	1333	30.06.2011	15.03.2011	2011	Mvuthu_ShaMabalea	Mondevillage	378115	8009369	378275	8009329	1	cattle	0	NA	Lion	N	D	N
1330	1334	07.07.2011	30.04.2011	2011	Mvuthu_ShaMabalea	Mondevillage	377199	8007374	376015	8011944	1	cattle	0	NA	Lion	N	D	N
1331	1335	14.07.2011	01.12.2009	2011	Mvuthu_ShaMabalea	Mondevillage	378385	8007253	380574	8006911	1	cattle	0	NA	Lion	N	N	N
1332	1336	15.07.2011	15.11.2009	2011	Mvuthu_ShaMabalea	Mondevillage	377567	8007281	376244	8011096	1	cattle	0	NA	Hyaena	N	N	N
1333	1337	17.07.2011	09.07.2011	2011	Mvuthu_ShaMabalea	BH13Musenikavillage	401328	7997869	402340	7996356	1	cattle	0	NA	Lion	N	N	N
1334	1338	15.07.2011	01.08.2009	2011	Mvuthu_ShaMabalea	Mondevillage	379102	8007867	373544	8006984	1	donkey	0	NA	Lion	N	N	N
1335	1339	17.07.2011	01.06.2011	2011	Mvuthu_ShaMabalea	Chikandakubivillage5	402081	7994687	403452	7993586	1	cattle	0	NA	Lion	N	N	N
1336	1340	17.07.2011	15.06.2011	2011	Mvuthu_ShaMabalea	BH13Musenikavillage	401188	7998110	402592	7997591	1	cattle	0	NA	Lion	N	N	N
1337	1341	17.07.2011	15.05.2011	2011	Mvuthu_ShaMabalea	BH13Musenikavillage	400937	7998040	401178	7997639	1	cattle	0	NA	Lion	N	N	N
1338	1342	17.07.2011	09.07.2011	2011	Mvuthu_ShaMabalea	BH13Musenikavillage	400937	7998040	402636	7996920	1	cattle	0	NA	Lion	N	N	N
1339	1343	17.07.2011	30.05.2011	2011	Mvuthu_ShaMabalea	BH13Musenikavillage	400937	7998040	403836	7998039	1	cattle	1	cattle	Lion	N	N	N
1340	1344	17.07.2011	11.07.2011	2011	Mvuthu_ShaMabalea	Chikandakubivillage5	401955	7995402	402030	7996408	1	pig	0	NA	Lion	N	N	N
1341	1345	18.07.2011	15.06.2011	2011	Mvuthu_ShaMabalea	ChikandakubiMitimitemavillage2	402141	7994122	401932	7993929	1	cattle	0	NA	Lion	N	N	N
1342	1346	18.07.2011	15.01.2009	2011	Mvuthu_ShaMabalea	Chikandakubivillage	402451	7994844	403587	7994060	1	donkey	0	NA	Hyaena	N	N	N
1343	1347	20.07.2011	15.05.2011	2011	Mvuthu_ShaMabalea	Sizindavillage	381147	8006514	381131	8005855	1	donkey	0	NA	Lion	N	N	N
1344	1348	20.07.2011	15.05.2011	2011	Mvuthu_ShaMabalea	Sizindavillage	381147	8006514	380896	8005636	1	cattle	0	NA	Lion	N	D	N
1345	1349	21.07.2011	01.02.2011	2011	Mvuthu_ShaMabalea	Sizindavillage	383743	8007949	383633	8007963	2	donkey	0	NA	Lion	N	N	N
1346	1350	17.07.2011	01.06.2011	2011	Mvuthu_ShaMabalea	BH13Musenikavillage	400937	7998040	403099	7997181	1	cattle	0	NA	Lion	N	N	N
1347	1351	28.07.2011	09.05.2011	2011	Mvuthu_ShaMabalea	Chikandakubivillage4	400301	7993913	400297	7993884	1	donkey	0	NA	Lion	Y	N	N
1348	1352	28.07.2011	27.07.2011	2011	Mvuthu_ShaMabalea	Chikandakubivillage4	400381	7994164	400155	7994896	0	NA	1	cattle	Lion	N	N	N
1349	1353	28.07.2011	20.07.2011	2011	Mvuthu_ShaMabalea	Chikandakubivillage5	401669	7994148	402135	7993944	1	donkey	0	NA	Lion	N	N	N
1350	1354	30.07.2011	30.07.2011	2011	Mvuthu_ShaMabalea	ChikandakubiMitimitemavillage1	401448	7994875	400354	7994798	1	donkey	0	NA	Lion	N	N	N
1351	1355	28.07.2011	01.07.2011	2011	Mvuthu_ShaMabalea	Sizindavillage	383190	8008968	383186	8008925	1	cattle	0	NA	Hyaena	N	N	N
1352	1356	04.08.2011	20.07.2011	2011	Mvuthu_ShaMabalea	ChisumaNo01village	388857	8007857	389419	8006992	1	donkey	0	NA	Hyaena	N	N	N
1353	1357	04.08.2011	04.04.2011	2011	Mvuthu_ShaMabalea	ChisumaNo02village	388596	8006633	388885	8006686	1	donkey	0	NA	Hyaena	Y	N	N
1354	1358	16.08.2011	30.05.2011	2011	Mvuthu_ShaMabalea	Dibutibuvillage	385949	8007766	385430	8007902	1	donkey	0	NA	Hyaena	N	N	N
1355	1359	04.08.2011	15.02.2011	2011	Mvuthu_ShaMabalea	ChisumaNo1Avillage	388160	8008166	388152	8008244	1	donkey	0	NA	Hyaena	N	N	N
1356	1360	04.09.2011	27.08.2011	2011	Mvuthu_ShaMabalea	BH13Musenikavillage	401241	7998415	400632	7999388	1	cattle	0	NA	Lion	N	N	N
1357	1361	04.09.2011	12.08.2011	2011	Mvuthu_ShaMabalea	BH13Musenikavillage	401241	7998415	401279	7996661	1	cattle	0	NA	Lion	N	N	N
1358	1362	04.09.2011	20.08.2011	2011	Mvuthu_ShaMabalea	BH13Musenikavillage	400923	7998003	401608	7996570	1	cattle	0	NA	Lion	N	N	N
1359	1363	04.09.2011	18.08.2011	2011	Mvuthu_ShaMabalea	BH13Musenikavillage	400923	7998003	402482	7996684	1	cattle	0	NA	Lion	N	N	N
1360	1364	04.09.2011	27.08.2011	2011	Mvuthu_ShaMabalea	BH13Musenikavillage	401256	7997997	401074	7997937	1	donkey	0	NA	Hyaena	N	N	N
1361	1365	04.09.2011	01.08.2011	2011	Mvuthu_ShaMabalea	BH13Musenikavillage	401186	7998112	401428	7996566	1	cattle	0	NA	Lion	N	N	N
1362	1366	03.09.2011	15.06.2011	2011	Mvuthu_ShaMabalea	Dibutibuvillage	386058	8008124	386058	8008124	3	goat	0	NA	Hyaena	N	N	N
1363	1367	21.08.2011	15.06.2011	2011	Mvuthu_ShaMabalea	Dibutibuvillage	385387	8007682	385197	8007466	1	cattle	1	cattle	Hyaena	N	N	N
1364	1368	31.08.2011	15.03.2011	2011	Mvuthu_ShaMabalea	SidobeNo02village	382106	8003681	380315	8004859	1	cattle	0	NA	Lion	N	D	N
1365	1369	18.09.2011	18.09.2011	2011	Mvuthu_ShaMabalea	SidobeNo04village	380614	8002697	380236	8001715	1	donkey	0	NA	Lion	N	N	N
1366	1370	27.09.2011	22.09.2011	2011	Mvuthu_ShaMabalea	BH118Jabulanivillage	379250	7998381	377745	7999974	1	cattle	0	NA	Lion	N	D	N
1367	1371	22.10.2011	21.10.2011	2011	Mvuthu_ShaMabalea	Mondevillage	377188	8007497	375533	8007335	1	cattle	0	NA	Lion	N	N	N
1368	1372	22.10.2011	21.10.2011	2011	Mvuthu_ShaMabalea	Mondevillage	377188	8007497	375533	8007335	1	cattle	0	NA	Lion	N	N	N
1369	1373	22.10.2011	21.10.2011	2011	Mvuthu_ShaMabalea	Mondevillage	377735	8007468	375533	8007335	1	cattle	0	NA	Lion	N	N	N
1370	1374	27.10.2011	15.03.2011	2011	Mvuthu_ShaMabalea	SidobeNo03village	379802	8004547	379752	8004537	2	goat	0	NA	Lion	N	D	N
1371	1375	27.10.2011	17.10.2011	2011	Mvuthu_ShaMabalea	SidobeNo03village	379802	8004547	379083	8004137	1	cattle	0	NA	Hyaena	N	N	N
1372	1376	27.10.2011	28.01.2011	2011	Mvuthu_ShaMabalea	SidobeNo03village	379656	8004281	379592	8004242	6	goat	0	NA	Lion	N	D	N
1373	1377	28.10.2011	01.01.2011	2011	Mvuthu_ShaMabalea	SidobeNo04village	380677	8002373	380734	8002458	1	cattle	0	NA	Lion	N	D	N
1374	1378	28.10.2011	15.05.2011	2011	Mvuthu_ShaMabalea	SidobeNo04village	380677	8002373	380050	8002582	1	goat	0	NA	Jackal	N	D	N
1375	1379	27.10.2011	10.04.2011	2011	Mvuthu_ShaMabalea	SidobeNo01village	384268	8003289	386015	8005146	3	cattle	0	NA	Lion	N	D	N
1376	1380	28.10.2011	15.04.2011	2011	Mvuthu_ShaMabalea	SidobeNo02village	382057	8003853	382010	8003893	1	pig	0	NA	Lion	Y	N	N
1377	1381	28.09.2011	28.09.2011	2011	Mvuthu_ShaMabalea	BH26Mpumelelovillage	387377	7997189	387700	7994646	1	cattle	0	NA	Lion	N	N	N
1378	1382	24.11.2011	22.11.2011	2011	Mvuthu_ShaMabalea	SidobeNo04village	380582	8002260	378768	8001782	5	cattle	0	NA	Lion	N	D	N
1379	1383	25.11.2011	15.03.2011	2011	Mvuthu_ShaMabalea	SidobeNo01village	382984	8004008	384246	8006303	3	cattle	2	cattle	Lion	N	D	N
1380	1384	25.11.2011	10.04.2011	2011	Mvuthu_ShaMabalea	SidobeNo01village	384171	8003346	386015	8005146	1	cattle	0	NA	Lion	N	N	N
1381	1385	26.11.2011	26.11.2011	2011	Mvuthu_ShaMabalea	Sizinda3village	379041	8006257	378726	8004742	2	cattle	2	NA	Lion	N	D	N
1382	1386	06.12.2011	04.12.2011	2011	Mvuthu_ShaMabalea	SidobeNo05village	383621	8002168	383574	8000956	1	cattle	0	NA	Lion	N	N	N
1383	1387	09.12.2011	15.09.2011	2011	Mvuthu_ShaMabalea	SidobeNo05village	384397	8002787	385084	8001640	1	donkey	0	NA	Hyaena	N	N	N
1384	1388	17.12.2011	15.12.2011	2011	Mvuthu_ShaMabalea	BH28Hlangananivillage	384017	7997237	383986	7997260	1	cattle	0	NA	Lion	Y	N	N
1385	1389	21.12.2011	10.12.2011	2011	Mvuthu_ShaMabalea	BH29Jabulanivillage	382375	7996744	384630	7995535	1	cattle	0	NA	Lion	N	N	N
1386	1390	21.12.2011	11.12.2011	2011	Mvuthu_ShaMabalea	BH09Ndlovuvillage	391380	7997501	390205	7994826	2	cattle	0	NA	Leopard	N	D	N
1387	1391	21.12.2011	30.11.2011	2011	Mvuthu_ShaMabalea	Chenamisavillage	405019	7993031	404703	7993031	1	cattle	0	NA	Leopard	N	D	N
1388	1392	21.12.2011	21.12.2011	2011	Mvuthu_ShaMabalea	BH13Musenikavillage	401201	7998095	400956	7995326	1	cattle	0	NA	Lion	N	N	N
1389	1393	21.12.2011	21.12.2011	2011	Mvuthu_ShaMabalea	Chenamisavillage	405306	7995078	406336	7993192	1	cattle	0	NA	Leopard	N	D	N
1390	1394	22.12.2011	13.12.2011	2011	Mvuthu_ShaMabalea	MbizhaTakazipiravillage4	409377	7998024	409987	7992218	1	cattle	0	NA	Lion	N	D	N
1391	1395	22.12.2011	17.12.2011	2011	Mvuthu_ShaMabalea	MbizhaVillage5	409608	7997352	410039	7992201	1	cattle	0	NA	Lion	N	N	N
1392	1396	22.12.2011	17.12.2011	2011	Mvuthu_ShaMabalea	MbizhaTakazipiravillage4	409682	7997204	410085	7992241	1	cattle	1	cattle	Lion	N	D	N
1393	1397	23.12.2011	09.12.2011	2011	Mvuthu_ShaMabalea	BH10Kachechetevillage	388555	7996925	390703	7993331	1	cattle	1	cattle	Lion	N	D	N
1394	1398	23.12.2011	10.12.2011	2011	Mvuthu_ShaMabalea	BH11ChiefMvuthuvillage	384839	7995621	384636	7995535	1	dog	0	NA	Lion	N	N	N
1395	1399	27.01.2012	15.03.2011	2011	Mvuthu_ShaMabalea	BH29Hlangananivillage	382413	7996179	381992	7996285	2	cattle	0	NA	Lion	N	D	N
1396	1400	09.02.2012	14.02.2011	2011	Mvuthu_ShaMabalea	BH29Jabulanivillage	381467	7997855	381462	7997832	1	cattle	0	NA	Lion	Y	N	N
1397	1401	11.02.2012	15.12.2011	2011	Mvuthu_ShaMabalea	BH10Kachechetevillage	388965	7996359	389437	7994263	1	cattle	0	NA	Lion	N	D	N
1398	1402	16.02.2012	01.01.2011	2011	Mvuthu_ShaMabalea	BH28Hlangananivillage	384588	7997436	384564	7997558	1	donkey	0	NA	Hyaena	N	N	N
1399	1403	18.02.2011	15.03.2011	2011	Mvuthu_ShaMabalea	BH28Hlangananivillage	383554	7997629	384066	7995883	1	donkey	0	NA	Hyaena	N	N	N
1400	1404	18.02.2012	15.07.2011	2011	Mvuthu_ShaMabalea	BH28Hlangananivillage	383768	7997308	384114	7997750	1	donkey	0	NA	Hyaena	N	N	N
1401	1405	18.02.2012	15.06.2011	2011	Mvuthu_ShaMabalea	BH28Hlangananivillage	383118	7998100	384095	7998683	1	cattle	0	NA	Lion	N	N	N
1402	1406	02.03.2011	15.05.2012	2011	Mvuthu_ShaMabalea	BH26Mvuthuvillage	387243	7997177	387547	7994457	1	donkey	0	NA	Lion	N	N	N
1403	1407	02.03.2011	01.11.2011	2011	Mvuthu_ShaMabalea	BH26Mvuthuvillage	386716	7997465	384968	7997428	1	donkey	0	NA	Hyaena	N	N	N
1404	1408	02.03.2012	15.06.2011	2011	Mvuthu_ShaMabalea	BH26Mvuthuvillage	386716	7997465	386380	7995937	1	donkey	0	NA	Lion	N	N	N
1405	1409	03.03.2012	15.12.2011	2011	Mvuthu_ShaMabalea	BH10Mpumelelovillage	388010	7996088	388010	7996088	3	goat	0	NA	Lion	Y	N	N
1406	1410	03.03.2012	15.12.2011	2011	Mvuthu_ShaMabalea	BH10Mpumelelovillage	388010	7996088	388010	7996088	1	cattle	0	NA	Lion	Y	N	N
1407	1411	03.03.2012	15.12.2011	2011	Mvuthu_ShaMabalea	BH10Mpumelelovillage	388010	7996088	388010	7996088	2	sheep	0	NA	Lion	Y	N	N
1408	1412	03.03.2012	15.06.2011	2011	Mvuthu_ShaMabalea	BH10Mpumelelovillage	388460	7996277	388181	7995147	1	cattle	0	NA	Lion	N	N	N
1409	1413	08.03.2012	15.04.2011	2011	Mvuthu_ShaMabalea	MnunaMakunivillage	424918	7996664	428203	7996076	1	cattle	0	NA	Lion	N	D	N
1410	1414	08.03.2012	01.08.2011	2011	Mvuthu_ShaMabalea	MnunaMakunivillage	423269	7997382	428262	7996001	1	cattle	0	NA	Lion	N	D	N
1411	1415	31.03.2012	15.09.2011	2011	Mvuthu_ShaMabalea	BH25Mpumelelovillage	389806	7996726	389441	7995082	1	cattle	0	NA	Lion	N	N	N
1412	1416	04.04.2012	15.08.2011	2011	Mvuthu_ShaMabalea	BH09Ndlovuvillage	391956	7997470	391831	7998549	1	donkey	0	NA	Lion	N	N	N
1413	1417	05.04.2012	15.01.2011	2011	Mvuthu_ShaMabalea	BH08Ndlovuvillage	395247	7998945	395179	7999083	1	donkey	0	NA	Hyaena	N	N	N
1414	1418	05.04.2012	15.09.2011	2011	Mvuthu_ShaMabalea	BH24Ndlovuvillage	393322	7999222	394119	7999360	1	donkey	0	NA	Hyaena	N	N	N
1415	1419	05.04.2012	30.05.2011	2011	Mvuthu_ShaMabalea	BH24Ndlovuvillage	393322	7999222	394630	7999570	1	donkey	0	NA	Hyaena	N	N	N
1416	1420	12.04.2012	15.05.2011	2011	Mvuthu_ShaMabalea	BH37Kachechetevillage	389502	8000641	388670	7998549	2	donkey	0	NA	Lion	N	N	N
1417	1421	13.04.2012	15.06.2011	2011	Mvuthu_ShaMabalea	BH07Chewumbavillage	399240	8000431	400416	8000898	1	cattle	0	NA	Hyaena	N	N	N
1418	1422	13.04.2012	15.04.2011	2011	Mvuthu_ShaMabalea	BH07Chewumbavillage	398376	8000316	398820	8000939	1	donkey	0	NA	Hyaena	N	N	N
1419	1423	13.04.2012	15.04.2011	2011	Mvuthu_ShaMabalea	BH07Chewumbavillage	398376	8000316	398010	8000051	5	goat	0	NA	Hyaena	N	N	N
1420	1424	13.04.2012	01.04.2011	2011	Mvuthu_ShaMabalea	BH07Chewumbavillage	399105	8000479	401907	8000458	1	donkey	0	NA	Lion	N	N	N
1421	1425	18.04.2012	15.10.2011	2011	Mvuthu_ShaMabalea	BH12Chewumbavillage	400995	7999510	400304	7999445	2	cattle	0	NA	Lion	N	N	N
1422	1426	18.04.2012	15.10.2011	2011	Mvuthu_ShaMabalea	BH12Chewumbavillage	400995	7999510	400473	7999351	1	cattle	0	NA	Lion	N	N	N
1423	1427	20.04.2012	30.05.2011	2011	Mvuthu_ShaMabalea	BH13Musenyikavillage	401520	8000104	402641	7997561	1	donkey	0	NA	Hyaena	N	N	N
1424	1428	11.05.2012	15.12.2011	2011	Mvuthu_ShaMabalea	ChikandakubiBatananivillage4	402310	7995320	403623	7988709	1	cattle	0	NA	Lion	N	D	N
1425	1429	17.05.2012	15.11.2011	2011	Mvuthu_ShaMabalea	Chishangavillage1	405340	7995103	NA	NA	1	cattle	0	NA	Lion	N	D	N
1426	1430	19.05.2012	28.02.2011	2011	Mvuthu_ShaMabalea	Chishangavillage2	406031	7994859	NA	NA	1	cattle	0	NA	Lion	N	N	N
1427	1431	29.01.2012	22.01.2012	2012	Mvuthu_ShaMabalea	BH10Kachechetevillage	388523	7996899	389443	7995088	2	donkey	1	donkey	Lion	N	D	N
1428	1432	17.02.2012	14.02.2012	2012	Mvuthu_ShaMabalea	Mondevillage	378607	8008991	375845	8012506	0	cattle	3	cattle	Leopard	N	D	N
1429	1433	08.03.2012	06.03.2012	2012	Mvuthu_ShaMabalea	MnunaMakunivillage	423636	7996155	427028	7996805	1	cattle	0	NA	Lion	N	N	N
1430	1434	04.04.2012	15.01.2012	2012	Mvuthu_ShaMabalea	BH09Ndlovuvillage	391541	7997778	391692	7998114	1	goat	0	NA	Jackal	N	D	N
1431	1435	04.04.2012	04.04.2012	2012	Mvuthu_ShaMabalea	BH24Ndlovuvillage	393090	7999249	394010	7998164	1	donkey	0	NA	Hyaena	N	N	N
1432	1436	17.04.2012	15.02.2012	2012	Mvuthu_ShaMabalea	BH82Chewumbavillage	397392	8000444	396907	7999689	2	donkey	0	NA	Hyaena	N	N	N
1433	1437	17.04.2012	10.02.2012	2012	Mvuthu_ShaMabalea	BH82Chewumbavillage	396653	8000659	396715	8001329	2	donkey	0	NA	Lion	N	N	N
1434	1438	20.04.2012	01.03.2012	2012	Mvuthu_ShaMabalea	BH130Musenyikavillage	402721	7997498	401207	7996618	1	cattle	0	NA	Hyaena	N	N	N
1435	1439	05.05.2012	05.05.2012	2012	Mvuthu_ShaMabalea	BH13Musenyikavillage	401361	7997856	401744	7997462	5	goat	0	NA	Hyaena	N	N	N
1436	1440	05.05.2012	05.05.2012	2012	Mvuthu_ShaMabalea	BH13Musenyikavillage	401361	7997856	402074	7997381	5	goat	0	NA	Hyaena	N	N	N
1437	1441	16.05.2012	30.01.2012	2012	Mvuthu_ShaMabalea	ChikandakubiMitimitemavillage1	399872	7993900	399727	7993860	2	goat	0	NA	Hyaena	N	N	N
1438	1442	14.06.2012	09.06.2012	2012	Mvuthu_ShaMabalea	BH28Hlangananivillage	383327	7997678	384937	7998323	1	donkey	0	NA	Hyaena	N	N	N
1439	1443	14.06.2012	12.06.2012	2012	Mvuthu_ShaMabalea	BH28Hlangananivillage	383327	7997678	384938	7998326	1	donkey	0	NA	Hyaena	N	N	N
1440	1444	20.06.2012	20.06.2012	2012	Mvuthu_ShaMabalea	DibutibuVillage	385632	8007790	385602	8007793	1	goat	0	NA	Lion	N	N	N
1441	1445	07.07.2012	07.07.2012	2012	Mvuthu_ShaMabalea	Mondevillage	378204	8007200	378378	8007190	2	cattle	0	NA	Lion	N	N	N
1442	1446	07.07.2012	07.07.2012	2012	Mvuthu_ShaMabalea	BH13Musenyikavillage	400938	7998043	401929	7996795	1	cattle	0	NA	Lion	N	N	N
1443	1447	13.07.2012	05.07.2012	2012	Mvuthu_ShaMabalea	BH13Musenyikavillage	400938	7998043	401333	7996265	1	cattle	0	NA	Lion	N	N	N
1444	1448	13.07.2012	11.07.2012	2012	Mvuthu_ShaMabalea	BH13Musenyikavillage	400938	7998043	401388	7996580	1	cattle	0	NA	Lion	N	N	N
1445	1449	13.07.2012	20.06.2012	2012	Mvuthu_ShaMabalea	BH13Musenyikavillage	400938	7998043	400713	7998054	1	cattle	0	NA	Lion	N	N	N
1446	1450	19.07.2012	15.07.2012	2012	Mvuthu_ShaMabalea	ChisumaVillage	391936	8006629	391961	8006659	1	goat	0	NA	Lion	N	N	N
1447	1451	18.07.2012	18.07.2012	2012	Mvuthu_ShaMabalea	ChikandakubiMitimitemavillage1	402087	7994479	403444	7993507	1	donkey	0	NA	Lion	N	N	N
1448	1452	25.10.2012	30.05.2012	2012	Mvuthu_ShaMabalea	Simadubishantanivillage2	411557	7992407	411545	7992485	1	donkey	0	NA	Lion	N	N	N
1449	1453	31.10.2012	15.10.2012	2012	Mvuthu_ShaMabalea	Siamwelevillage4	403204	8000271	402705	8000590	1	donkey	0	NA	Hyaena	N	N	N
1450	1454	08.11.2012	15.01.2012	2012	Mvuthu_ShaMabalea	Siamwelevillage5	404140	8000998	404942	8001425	1	donkey	0	NA	Hyaena	N	N	N
1451	1455	08.11.2012	30.01.2012	2012	Mvuthu_ShaMabalea	Siamwelevillage5	404140	8000998	404358	8001499	1	donkey	0	NA	Hyaena	N	N	N
1452	1456	08.11.2012	15.01.2012	2012	Mvuthu_ShaMabalea	Siamwelevillage5	404140	8000998	404421	8001357	1	donkey	0	NA	Hyaena	N	N	N
1453	1457	08.11.2012	15.10.2012	2012	Mvuthu_ShaMabalea	Siamwelevillage5	404140	8000998	404421	8001357	1	donkey	0	NA	Hyaena	N	N	N
1454	1458	08.11.2012	15.02.2012	2012	Mvuthu_ShaMabalea	Siamwelevillage5	404140	8000998	403888	8001235	1	donkey	0	NA	Hyaena	N	N	N
1455	1459	08.11.2012	15.02.2012	2012	Mvuthu_ShaMabalea	Siamwelevillage5	403889	8001266	403569	8001080	1	donkey	0	NA	Hyaena	N	N	N
1456	1460	28.11.2012	30.08.2012	2012	Mvuthu_ShaMabalea	Nemanangavillage2	412880	8002986	413078	8004745	1	cattle	0	NA	Hyaena	N	N	N
1457	1461	06.12.2012	30.05.2012	2012	Mvuthu_ShaMabalea	Nyikanyorovillage2	414578	8003184	414562	8003233	1	cattle	0	NA	Hyaena	N	N	N
1458	1462	06.12.2012	28.02.2012	2012	Mvuthu_ShaMabalea	Nyikanyorovillage2	414563	8003176	414288	8005128	1	cattle	0	NA	Hyaena	N	N	N
1459	1463	06.12.2012	15.11.2012	2012	Mvuthu_ShaMabalea	Nyikanyorovillage2	414563	8003176	414288	8005131	1	cattle	0	NA	Hyaena	N	N	N
1460	1464	20.12.2012	15.05.2012	2012	Mvuthu_ShaMabalea	Chenjirivillage1	421488	8006417	421303	8008353	1	donkey	0	NA	Hyaena	N	N	N
1461	1465	20.12.2012	15.03.2012	2012	Mvuthu_ShaMabalea	Chenjirivillage1	421150	8006718	422964	8007652	1	donkey	0	NA	Hyaena	N	N	N
1462	1466	24.12.2012	10.12.2012	2012	Mvuthu_ShaMabalea	ChenjevillageD	416401	8009401	416402	8010160	1	cattle	0	NA	Hyaena	N	N	N
1463	1467	24.12.2012	30.04.2012	2012	Mvuthu_ShaMabalea	ChenjevillageD	416401	8009401	416814	8009037	1	donkey	0	NA	Hyaena	N	N	N
1464	1468	27.12.2012	22.12.2012	2012	Mvuthu_ShaMabalea	GavuBupenyubamangwanavillage1	421992	8008621	422430	8008809	1	goat	0	NA	Jackal	N	D	N
1465	1469	27.12.2012	15.08.2012	2012	Mvuthu_ShaMabalea	GavuBupenyubamangwanavillage1	421992	8008621	421813	8008162	2	goat	0	NA	Jackal	N	D	N
1466	1470	27.12.2012	30.12.2012	2012	Mvuthu_ShaMabalea	GavuBupenyubamangwanavillage1	421992	8008621	421922	8008006	1	goat	0	NA	Jackal	N	D	N
1467	1471	28.12.2012	15.06.2012	2012	Mvuthu_ShaMabalea	GavuBupenyubamangwanavillage2	419684	8007667	419901	8007693	2	donkey	0	NA	Hyaena	N	N	N
1468	1472	28.12.2012	30.11.2012	2012	Mvuthu_ShaMabalea	GavuBupenyubamangwanavillage2	419684	8007667	419713	8008641	1	donkey	0	NA	Hyaena	N	N	N
1469	1473	28.12.2012	30.01.2012	2012	Mvuthu_ShaMabalea	GavuBupenyubamangwanavillage2	419684	8007667	419065	8008553	1	donkey	0	NA	Hyaena	N	N	N
1470	1474	16.01.2013	16.01.2013	2013	Mvuthu_ShaMabalea	Lumboravillage1	432750	8000296	431980	8000076	1	cattle	0	NA	Lion	N	D	N
1471	1475	02.07.2013	20.06.2013	2013	Mvuthu_ShaMabalea	Mvuthuvillage	385481	7997052	385633	7996888	7	goat	0	NA	Lion	Y	N	N
1472	1476	02.07.2013	20.06.2013	2013	Mvuthu_ShaMabalea	Hlangananivillage	382705	7997041	382674	7996993	1	cattle	1	cattle	Lion	Y	N	N
1473	1477	02.07.2013	15.01.2013	2013	Mvuthu_ShaMabalea	Hlangananivillage	382465	7996966	382484	7996743	1	cattle	0	NA	Lion	N	N	N
1474	1478	02.07.2013	25.07.2013	2013	Mvuthu_ShaMabalea	Hlangananivillage	383752	7997361	384171	7997763	1	donkey	0	NA	Lion	N	N	N
1475	1479	03.07.2013	20.06.2013	2013	Mvuthu_ShaMabalea	Ndlovuvillage	392881	7999051	393552	7999502	2	donkey	0	NA	Lion	N	N	N
1476	1480	03.07.2013	20.06.2013	2013	Mvuthu_ShaMabalea	Ndlovuvillage	392682	7999158	393017	7999285	1	donkey	0	NA	Lion	N	N	N
1477	1481	03.07.2013	20.06.2013	2013	Mvuthu_ShaMabalea	Ndlovuvillage	392682	7999158	393045	7999258	1	donkey	0	NA	Lion	N	N	N
1478	1482	04.07.2013	15.06.2013	2013	Mvuthu_ShaMabalea	Chewumbavillage	400931	7998040	402840	7996985	1	donkey	0	NA	Hyaena	N	N	N
1479	1483	04.07.2013	20.06.2013	2013	Mvuthu_ShaMabalea	ChikandakubiBatananivillage2	402547	7994568	402529	7994568	4	goat	0	NA	Lion	Y	N	N
1480	1484	04.07.2013	25.06.2013	2013	Mvuthu_ShaMabalea	Chewumbavillage	400931	7998040	401635	7996946	1	cattle	0	NA	Lion	N	N	N
1481	1485	04.07.2013	15.06.2013	2013	Mvuthu_ShaMabalea	ChikandakubiMitimitemavillage3	399813	7993778	399807	7993780	2	goat	0	NA	Lion	Y	N	N
1482	1486	04.07.2013	25.06.2013	2013	Mvuthu_ShaMabalea	Chewumbavillage	401223	7998113	401636	7996943	1	cattle	0	NA	Lion	N	N	N
1483	1487	05.07.2013	05.07.2013	2013	Mvuthu_ShaMabalea	Jembwevillage	393262	8007533	393267	8007493	1	cattle	0	NA	Lion	Y	N	N
1484	1488	05.07.2013	05.07.2013	2013	Mvuthu_ShaMabalea	Jembwevillage	393262	8007533	393267	8007493	2	goat	0	NA	Lion	Y	N	N
1485	1489	05.07.2013	05.07.2013	2013	Mvuthu_ShaMabalea	Jembwevillage	393774	8007486	393774	8007486	2	goat	0	NA	Lion	Y	N	N
1486	1490	15.07.2013	15.07.2013	2013	Mvuthu_ShaMabalea	BH57village	403499	8007074	403977	8007066	1	donkey	0	NA	Lion	Y	N	N
1487	1491	08.07.2013	08.07.2013	2013	Mvuthu_ShaMabalea	Jembwevillage	392706	8008742	392671	8008794	6	pig	0	NA	Lion	Y	N	N
1488	1492	27.08.2013	27.08.2013	2013	Mvuthu_ShaMabalea	Mondevillage	378018	8007764	378005	8007807	1	donkey	0	NA	Lion	Y	N	N
1489	1493	29.08.2013	29.08.2013	2013	Mvuthu_ShaMabalea	Ndlovuvillage	395413	7999361	395398	7999648	1	donkey	0	NA	Hyaena	N	N	N
1490	1494	04.09.2013	04.09.2013	2013	Mvuthu_ShaMabalea	Jembwevillage	392161	8008621	390884	8008378	1	donkey	0	NA	Hyaena	N	N	N
1491	1495	04.09.2013	28.08.2013	2013	Mvuthu_ShaMabalea	BH85village	406892	8001136	405737	8002328	3	cattle	0	NA	Lion	N	N	N
1492	1496	04.09.2013	23.08.2013	2013	Mvuthu_ShaMabalea	BH85village	406531	8001141	406498	8001178	1	donkey	0	NA	Lion	N	N	N
1493	1497	04.09.2013	25.08.2013	2013	Mvuthu_ShaMabalea	BH85village	406531	8001141	406698	8001890	1	cattle	0	NA	Lion	N	N	N
1494	1498	05.09.2013	30.07.2013	2013	Mvuthu_ShaMabalea	BH83village	404447	8000926	405380	8001013	1	donkey	0	NA	Lion	N	N	Y
1495	1499	05.09.2013	30.07.2013	2013	Mvuthu_ShaMabalea	BH83village	404447	8000926	405380	8001013	1	donkey	0	NA	Lion	N	N	Y
1496	1500	18.12.2013	01.08.2013	2013	Mvuthu_ShaMabalea	Ndlovuvillage	391331	7997611	391821	7992874	1	cattle	0	NA	Lion	N	D	N
1497	1501	18.12.2013	18.12.2013	2013	Mvuthu_ShaMabalea	Ndlovuvillage	391369	7997434	394219	7994389	1	cattle	0	NA	Lion	N	D	Y
1498	1502	18.12.2013	18.12.2013	2013	Mvuthu_ShaMabalea	Ndlovuvillage	391331	7997611	394190	7994346	1	cattle	0	NA	Lion	N	D	Y
1499	1503	24.12.2013	18.12.2013	2013	Mvuthu_ShaMabalea	Ndlovuvillage	392951	7999022	394278	7994474	1	cattle	0	NA	Lion	N	D	N
1500	1504	24.12.2013	18.12.2013	2013	Mvuthu_ShaMabalea	Ndlovuvillage	392951	7999022	394218	7994438	1	cattle	0	NA	Lion	N	D	N
1501	1505	24.12.2013	18.12.2013	2013	Mvuthu_ShaMabalea	Ndlovuvillage	392951	7999022	394291	7994488	1	cattle	0	NA	Lion	N	D	N
1502	1506	24.12.2013	24.12.2013	2013	Mvuthu_ShaMabalea	Mvuthuvillage	385516	7996211	387626	7994514	0	NA	3	cattle	Lion	N	D	Y
1503	1507	25.12.2013	25.12.2013	2013	Mvuthu_ShaMabalea	Mvuthuvillage	385026	7996297	383789	7995097	1	cattle	0	NA	Lion	N	D	Y
1504	1508	25.12.2013	25.12.2013	2013	Mvuthu_ShaMabalea	Mvuthuvillage	384199	7996038	383789	7995097	3	cattle	0	NA	Lion	N	D	Y
1505	1509	30.12.2013	21.12.2013	2013	Mvuthu_ShaMabalea	ChikandakubiMitimitemavillage3	399842	7993892	399824	7993910	6	goat	0	NA	Lion	Y	N	Y
1506	1510	30.12.2013	21.12.2013	2013	Mvuthu_ShaMabalea	ChikandakubiMitimitemavillage3	399842	7993892	399824	7993910	2	goat	0	NA	Lion	Y	N	Y
1507	1511	30.12.2013	21.12.2013	2013	Mvuthu_ShaMabalea	ChikandakubiMitimitemavillage3	399842	7993892	399824	7993910	3	goat	0	NA	Lion	Y	N	Y
1508	1512	30.12.2013	21.12.2013	2013	Mvuthu_ShaMabalea	ChikandakubiMitimitemavillage3	399842	7993892	399824	7993910	2	goat	0	NA	Lion	Y	N	Y
1509	1513	30.12.2013	15.11.2013	2013	Mvuthu_ShaMabalea	Chewumbavillage	400927	7998043	400369	8000637	1	cattle	0	NA	Lion	N	N	N
1510	1514	30.12.2013	15.11.2013	2013	Mvuthu_ShaMabalea	Chewumbavillage	400927	7998043	400369	8000637	1	cattle	0	NA	Lion	N	N	Y
1511	1515	30.12.2013	01.11.2013	2013	Mvuthu_ShaMabalea	Chewumbavillage	400927	7998043	401283	7996016	1	cattle	0	NA	Hyaena	N	N	N
1512	1516	30.12.2013	15.09.2013	2013	Mvuthu_ShaMabalea	Chewumbavillage	401338	7997880	401183	7996598	1	donkey	0	NA	Hyaena	N	N	Y
1513	1517	30.12.2013	15.11.2013	2013	Mvuthu_ShaMabalea	Chewumbavillage	401223	7998117	401365	7997618	1	cattle	0	NA	Hyaena	N	N	N
1514	1518	30.12.2013	01.12.2013	2013	Mvuthu_ShaMabalea	Chewumbavillage	400927	7998043	401543	7998169	0	NA	1	donkey	Hyaena	N	N	N
1515	1519	30.12.2013	15.11.2012	2013	Mvuthu_ShaMabalea	Chewumbavillage	401223	7998117	401543	7998169	1	donkey	0	NA	Hyaena	N	N	N
1516	1520	30.12.2013	15.11.2013	2013	Mvuthu_ShaMabalea	Chewumbavillage	401303	7998054	397858	7993276	1	cattle	0	NA	Lion	N	D	N
1517	1521	25.11.2013	25.11.2013	2013	Mvuthu_ShaMabalea	Mpumelelovillage	388377	7996460	389457	7994127	1	cattle	0	NA	Lion	N	N	N
1518	1522	15.10.2013	15.11.2013	2013	Mvuthu_ShaMabalea	Chenamisavillage	404338	7995123	404349	7995155	1	donkey	0	NA	Lion	Y	N	N
1519	1523	15.10.2013	15.10.2013	2013	Mvuthu_ShaMabalea	Chenamisavillage	404338	7995123	403508	7994608	1	cattle	0	NA	Lion	N	D	N
1520	1524	25.11.2013	25.11.2013	2013	Mvuthu_ShaMabalea	Mvuthuvillage	387786	7996884	388022	7993817	2	cattle	0	NA	Lion	N	D	Y
1521	1525	08.01.2014	01.11.2013	2013	Mvuthu_ShaMabalea	Chenamisavillage	406074	7994852	405995	7994846	1	donkey	0	NA	Lion	Y	N	N
1522	1526	01.01.2013	01.11.2013	2013	Mvuthu_ShaMabalea	Chenamisavillage	406074	7994852	406043	7994864	2	goat	0	NA	Lion	Y	N	N
1523	1527	08.01.2013	09.03.2013	2013	Mvuthu_ShaMabalea	Chenamisavillage	405490	7994776	405700	7994210	4	donkey	0	NA	Lion	N	D	Y
1524	1528	08.01.2013	01.11.2013	2013	Mvuthu_ShaMabalea	Chenamisavillage	404949	7994731	403122	7994312	2	donkey	0	NA	Lion	N	D	Y
1525	1529	08.01.2014	01.11.2013	2013	Mvuthu_ShaMabalea	Chenamisavillage	406074	7994852	403533	7994285	1	cattle	0	NA	Lion	N	D	Y
1526	1530	09.01.2014	01.10.2013	2013	Mvuthu_ShaMabalea	Chenamisavillage	404344	7995545	404380	7995543	3	goat	0	NA	Lion	Y	N	Y
1527	1531	09.01.2014	15.10.2013	2013	Mvuthu_ShaMabalea	Ndimakulevillage	408436	7996375	408161	7995293	2	donkey	0	NA	Lion	N	N	Y
1528	1532	09.01.2014	15.10.2013	2013	Mvuthu_ShaMabalea	Ndimakulevillage	408436	7996375	403142	7994372	3	donkey	0	NA	Lion	N	N	Y
1529	1533	09.01.2014	15.10.2013	2013	Mvuthu_ShaMabalea	Ndimakulevillage	408494	7996424	408149	7995290	1	donkey	0	NA	Lion	N	N	N
1530	1534	09.01.2014	01.12.2013	2013	Mvuthu_ShaMabalea	Ndlovuvillage	392046	7997554	390228	7994767	1	cattle	0	NA	Lion	N	D	Y
